# Supplementary material for: Global estimates and determinants of antituberculosis drug pharmacokinetics in children and adolescents: a systematic review and individual patient data meta-analysis
Source: PubMed Central journal article supplement — Eur Respir J. 2023 Mar 9;61(3):2201596. doi: 10.1183/13993003.01596-2022 (PMC9996834; doi:10.1183/13993003.01596-2022), 2023-03-09

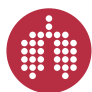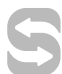

SHAREABLE PDF

# Global estimates and determinants of antituberculosis drug pharmacokinetics in children and adolescents: a systematic review and individual patient data meta-analysis

Fajri Gafar <sup>1</sup>, Roeland E. Wasmann<sup>2</sup>, Helen M. McIlleron<sup>2,3</sup>, Rob E. Aarnoutse<sup>4</sup>, H. Simon Schaaf <sup>5</sup>, Ben J. Marais <sup>6,7</sup>, Dipti Agarwal<sup>8</sup>, Sampson Antwi<sup>9,10</sup>, Nguyen D. Bang<sup>11</sup>, Adrie Bekker<sup>5</sup>, David J. Bell<sup>12</sup>, Chishala Chabala <sup>13,14</sup>, Louise Choo<sup>15</sup>, Geraint R. Davies<sup>16,17</sup>, Jeremy N. Day<sup>18,19</sup>, Rajeshwar Dayal<sup>20</sup>, Paolo Denti<sup>2</sup>, Peter R. Donald<sup>5</sup>, Ephrem Engidawork <sup>21</sup>, Anthony J. Garcia-Prats <sup>22</sup>, Diana Gibb <sup>15</sup>, Stephen M. Graham <sup>23,24</sup>, Anneke C. Hesselink<sup>5</sup>, Scott K. Heysell<sup>25</sup>, Misgana I. Idris<sup>26</sup>, Sushil K. Kabra<sup>27</sup>, Aarti Kinikar<sup>28</sup>, Agibothu K. Hemanth Kumar<sup>29</sup>, Awewura Kwara<sup>30</sup>, Rakesh Lodha<sup>27</sup>, Cecile Magis-Escurra<sup>31</sup>, Nilza Martinez<sup>32</sup>, Binu S. Mathew<sup>33</sup>, Vidya Mave<sup>28,34</sup>, Estomih Mduma <sup>35</sup>, Rachel Mlotha-Mitole<sup>36</sup>, Stellah G. Mpagama<sup>37</sup>, Aparna Mukherjee<sup>27</sup>, Heda M. Nataprawira<sup>38</sup>, Charles A. Peloquin<sup>39</sup>, Thomas Pouplin<sup>40</sup>, Geetha Ramachandran<sup>29</sup>, Jaya Ranjalkar<sup>33</sup>, Vandana Roy<sup>41</sup>, Rovina Ruslami<sup>42</sup>, Ira Shah<sup>43</sup>, Yatish Singh<sup>20</sup>, Marieke G.G. Sturkenboom<sup>44</sup>, Elin M. Svensson<sup>4,45</sup>, Soumya Swaminathan<sup>29,46</sup>, Urmila Thatte<sup>47</sup>, Stephanie Thee <sup>48</sup>, Tania A. Thomas<sup>25</sup>, Tjokosela Tikiso<sup>2</sup>, Daan J. Touw<sup>44</sup>, Anna Turkova<sup>15</sup>, Thirumurthy Velpandian<sup>49</sup>, Lilly M. Verhagen<sup>50,51,52</sup>, Jana L. Winckler<sup>5</sup>, Hongmei Yang<sup>53</sup>, Vycke Yunivita<sup>42</sup>, Katja Taxis<sup>1</sup>, Jasper Stevens<sup>44,56</sup> and Jan-Willem C. Alffenaar <sup>7,54,55,56</sup> for the Global Collaborative Group for Meta-Analysis of Paediatric Individual Patient Data in Pharmacokinetics of Anti-TB Drugs

<sup>1</sup>University of Groningen, Groningen Research Institute of Pharmacy, Unit of Pharmacotherapy, -Epidemiology and -Economics, Groningen, The Netherlands. <sup>2</sup>University of Cape Town, Department of Medicine, Division of Clinical Pharmacology, Cape Town, South Africa. <sup>3</sup>University of Cape Town, Institute of Infectious Disease and Molecular Medicine, Wellcome Centre for Infectious Diseases Research in Africa (CIDRI-Africa), Cape Town, South Africa. <sup>4</sup>Radboud University Medical Center, Radboud Institute of Health Sciences, Department of Pharmacy, Nijmegen, The Netherlands. <sup>5</sup>Stellenbosch University, Faculty of Medicine and Health Sciences, Department of Paediatrics and Child Health, Desmond Tutu Tuberculosis Centre, Tygerberg, South Africa. <sup>6</sup>The Children's Hospital at Westmead, Sydney, Australia. <sup>7</sup>The University of Sydney, Sydney Institute for Infectious Diseases, Sydney, Australia. <sup>8</sup>Ram Manohar Lohia Institute of Medical Sciences, Department of Paediatrics, Lucknow, India. <sup>9</sup>Komfo Anokye Teaching Hospital, Department of Child Health, Kumasi, Ghana. <sup>10</sup>Kwame Nkrumah University of Science and Technology, School of Medical Sciences, Department of Child Health, Kumasi, Ghana. <sup>11</sup>Pham Ngoc Thach Hospital, Ho Chi Minh City, Vietnam. <sup>12</sup>NHS Greater Glasgow and Clyde, Infectious Diseases Unit, Glasgow, UK. <sup>13</sup>University of Zambia, School of Medicine, Department of Paediatrics, Lusaka, Zambia. <sup>14</sup>University Teaching Hospitals – Children's Hospital, Lusaka, Zambia. <sup>15</sup>University College London, Medical Research Council Clinical Trials Unit, London, UK. <sup>16</sup>Malawi Liverpool Wellcome Clinical Research Programme, Clinical Department, Blantyre, Malawi. <sup>17</sup>University of Liverpool, Institute of Infection, Veterinary and Ecological Sciences, Liverpool, UK. <sup>18</sup>Oxford University Clinical Research Unit, Ho Chi Minh City, Vietnam. <sup>19</sup>University of Oxford, Nuffield Department of Medicine, Centre for Tropical Medicine and Global Health, Oxford, UK. <sup>20</sup>Sarojini Naidu Medical College, Department of Pediatrics, Agra, India. <sup>21</sup>Addis Ababa University, College of Health Sciences, School of Pharmacy, Department of Pharmacology and Clinical Pharmacy, Addis Ababa, Ethiopia. <sup>22</sup>University of Wisconsin-Madison, School of Medicine and Public Health, Department of Pediatrics, Madison, WI, USA. <sup>23</sup>University of Melbourne, Department of Paediatrics and Murdoch Children's Research Institute, Royal Children's Hospital, Melbourne, Australia. <sup>24</sup>International Union Against Tuberculosis and Lung Disease, Paris, France. <sup>25</sup>University of Virginia, Division of Infectious Diseases and International Health, Charlottesville, VA, USA. <sup>26</sup>University of Alabama at Birmingham, Department of Biology, Birmingham, AL, USA. <sup>27</sup>All India Institute of Medical Sciences, Departments of Pediatrics, New Delhi, India. <sup>28</sup>Byramjee Jeejeebhoy Government Medical College – Johns Hopkins University Clinical Research Site, Pune, India. <sup>29</sup>Indian Council of Medical Research, National Institute for Research in Tuberculosis, Chennai, India. <sup>30</sup>University of Florida, Emerging Pathogens Institute, College of Medicine, Gainesville, FL, USA. <sup>31</sup>Radboud University Medical Center – TB Expert Centre, Nijmegen, The Netherlands. <sup>32</sup>Instituto Nacional de Enfermedades Respiratorias y Del Ambiente, Asunción, Paraguay. <sup>33</sup>Christian Medical College and Hospital, Department of Pharmacology and Clinical Pharmacology, Vellore, India. <sup>34</sup>Johns Hopkins University, Department of Medicine and Infectious Diseases, Baltimore, MD, USA. <sup>35</sup>Haydom Lutheran Hospital, Center for Global Health Research, Haydom, Tanzania. <sup>36</sup>Queen Elizabeth Central Hospital, Department of Paediatrics, Blantyre, Malawi. <sup>37</sup>Kibong'oto Infectious Diseases Hospital, Sanya Juu, Tanzania. <sup>38</sup>Universitas Padjadjaran, Hasan Sadikin Hospital, Faculty of Medicine, Department of Child Health, Division of Paediatric Respiriology, Bandung, Indonesia. <sup>39</sup>University of Florida College of Pharmacy, Gainesville, FL, USA. <sup>40</sup>Mahidol University, Faculty of Tropical Medicine, Mahidol-Oxford Tropical Medicine Research Unit, Bangkok, Thailand. <sup>41</sup>Maulana Azad Medical College, Department of Pharmacology, New Delhi, India. <sup>42</sup>Universitas Padjadjaran, Faculty of Medicine, Department of Biomedical Sciences, Division of Pharmacology and Therapy, Bandung, Indonesia. <sup>43</sup>Bai Jerbai Wadia Hospital for Children, Department of Pediatric Infectious Diseases, Pediatric TB Clinic, Mumbai, India. <sup>44</sup>University of Groningen,

University Medical Center Groningen, Department of Clinical Pharmacy and Pharmacology, Groningen, The Netherlands. <sup>45</sup>Uppsala University, Department of Pharmacy, Uppsala, Sweden. <sup>46</sup>World Health Organization, Public Health Division, Geneva, Switzerland. <sup>47</sup>Seth Gordhandas Sunderdas Medical College and King Edward Memorial Hospital, Department of Clinical Pharmacology, Mumbai, India. <sup>48</sup>Charité-Universitätsmedizin Berlin, Corporate Member of Freie Universität Berlin, Humboldt-Universität zu Berlin, Department of Pediatric Respiratory Medicine, Immunology and Critical Care Medicine, Berlin, Germany. <sup>49</sup>All India Institute of Medical Sciences, Ocular Pharmacology and Pharmacy Division, Dr R.P. Centre, New Delhi, India. <sup>50</sup>Radboud University Medical Center, Radboud Center for Infectious Diseases, Laboratory of Medical Immunology, Section of Pediatric Infectious Diseases, Nijmegen, The Netherlands. <sup>51</sup>Radboud University Medical Center, Amalia Children's Hospital, Department of Paediatric Infectious Diseases and Immunology, Nijmegen, The Netherlands. <sup>52</sup>Stellenbosch University, Family Centre for Research with UBUNTU, Department of Paediatrics and Child Health, Cape Town, South Africa. <sup>53</sup>University of Rochester, School of Medicine and Dentistry, Department of Biostatistics and Computational Biology, Rochester, NY, USA. <sup>54</sup>The University of Sydney, Faculty of Medicine and Health, School of Pharmacy, Sydney, Australia. <sup>55</sup>Westmead Hospital, Sydney, Australia. <sup>56</sup>Both authors contributed equally and shared senior authorship.

Corresponding author: Fajri Gafar (f.gafar@rug.nl)

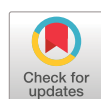

Shareable abstract (@ERSpublications)

**Summary estimates and key determinants of anti-TB drug pharmacokinetics in children and adolescents were assessed from globally available data, advocating for dose adjustment or therapeutic drug monitoring in certain groups at risk of suboptimal exposures** <https://bit.ly/3Vzw4f0>

**Cite this article as:** Gafar F, Wasmann RE, McIlleron HM, *et al.* Global estimates and determinants of antituberculosis drug pharmacokinetics in children and adolescents: a systematic review and individual patient data meta-analysis. *Eur Respir J* 2023; 61: 2201596 [DOI: 10.1183/13993003.01596-2022].

This single-page version can be shared freely online.

Copyright ©The authors 2023.

This version is distributed under the terms of the Creative Commons Attribution Non-Commercial Licence 4.0. For commercial reproduction rights and permissions contact [permissions@ersnet.org](mailto:permissions@ersnet.org)

This article has an editorial commentary:  
<https://doi.org/10.1183/13993003.02003-2022>

Received: 12 Aug 2022  
Accepted: 10 Oct 2022

## Abstract

**Background** Suboptimal exposure to antituberculosis (anti-TB) drugs has been associated with unfavourable treatment outcomes. We aimed to investigate estimates and determinants of first-line anti-TB drug pharmacokinetics in children and adolescents at a global level.

**Methods** We systematically searched MEDLINE, Embase and Web of Science (1990–2021) for pharmacokinetic studies of first-line anti-TB drugs in children and adolescents. Individual patient data were obtained from authors of eligible studies. Summary estimates of total/extrapolated area under the plasma concentration–time curve from 0 to 24 h post-dose ( $AUC_{0-24}$ ) and peak plasma concentration ( $C_{max}$ ) were assessed with random-effects models, normalised with current World Health Organization-recommended paediatric doses. Determinants of  $AUC_{0-24}$  and  $C_{max}$  were assessed with linear mixed-effects models.

**Results** Of 55 eligible studies, individual patient data were available for 39 (71%), including 1628 participants from 12 countries. Geometric means of steady-state  $AUC_{0-24}$  were summarised for isoniazid (18.7 (95% CI 15.5–22.6) h·mg·L<sup>-1</sup>), rifampicin (34.4 (95% CI 29.4–40.3) h·mg·L<sup>-1</sup>), pyrazinamide (375.0 (95% CI 339.9–413.7) h·mg·L<sup>-1</sup>) and ethambutol (8.0 (95% CI 6.4–10.0) h·mg·L<sup>-1</sup>). Our multivariate models indicated that younger age (especially <2 years) and HIV-positive status were associated with lower  $AUC_{0-24}$  for all first-line anti-TB drugs, while severe malnutrition was associated with lower  $AUC_{0-24}$  for isoniazid and pyrazinamide. *N*-acetyltransferase 2 rapid acetylators had lower isoniazid  $AUC_{0-24}$  and slow acetylators had higher isoniazid  $AUC_{0-24}$  than intermediate acetylators. Determinants of  $C_{max}$  were generally similar to those for  $AUC_{0-24}$ .

**Conclusions** This study provides the most comprehensive estimates of plasma exposures to first-line anti-TB drugs in children and adolescents. Key determinants of drug exposures were identified. These may be relevant for population-specific dose adjustment or individualised therapeutic drug monitoring.

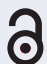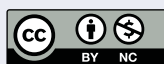

Supplement: ERJ-01596-2022.Shareable.pdf [file ERJ-01596-2022.Shareable.pdf]
