# Supplementary material for: Global estimates and determinants of antituberculosis drug pharmacokinetics in children and adolescents: a systematic review and individual patient data meta-analysis
Source: PubMed Central journal article supplement — Eur Respir J. 2023 Mar 9;61(3):2201596. doi: 10.1183/13993003.01596-2022 (PMC9996834; doi:10.1183/13993003.01596-2022), 2023-03-09
Supplement: ERJ-01596-2022.Supplement.pdf [file ERJ-01596-2022.Supplement.pdf]

## Online data supplement

### **Global estimates and determinants of antituberculosis drug pharmacokinetics in children and adolescents: a systematic review and individual patient data meta-analysis**

Fajri Gafar,\* Roeland E. Wasmann, Helen M. McIlleron, Rob E. Aarnoutse, H. Simon Schaaf, Ben J. Marais, Dipti Agarwal, Sampson Antwi, Nguyen D. Bang, Adrie Bekker, David J. Bell, Chishala Chabala, Louise Choo, Geraint R. Davies, Jeremy N. Day, Rajeshwar Dayal, Paolo Denti, Peter R. Donald, Ephrem Engidawork, Anthony J. Garcia-Prats, Diana Gibb, Stephen M. Graham, Anneke C. Hesseling, Scott K. Heysell, Misgana I. Idris, Sushil K. Kabra, Aarti Kinikar, Agibothu K. Hemanth Kumar, Awewura Kwara, Rakesh Lodha, Cecile Magis-Escurra, Nilza Martinez, Binu S. Mathew, Vidya Mave, Estomih Mduma, Rachel Mlotha-Mitole, Stellah G. Mpagama, Aparna Mukherjee, Heda M. Nataprawira, Charles A. Peloquin, Thomas Pouplin, Geetha Ramachandran, Jaya Ranjalkar, Vandana Roy, Rovina Ruslami, Ira Shah, Yatish Singh, Marieke G. G. Sturkenboom, Elin M. Svensson, Soumya Swaminathan, Urmilla Thatte, Stephanie Thee, Tania A. Thomas, Tjokosela Tikiso, Daan J. Touw, Anna Turkova, Thirumurthy Velpandian, Lilly M. Verhagen, Jana Winckler, Hongmei Yang, Vycke Yunivita, Katja Taxis, Jasper Stevens, Jan-Willem C. Alffenaar.

**\*Corresponding author:**

Fajri Gafar (f.gafar@rug.nl)

## Table of contents

|            | <i>Page</i> |
|------------|-------------|
| Appendix 1 | 4           |
| Appendix 2 | 6           |
| Appendix 3 | 10          |
| Appendix 4 | 11          |
| Appendix 5 | 12          |
| Table E1   | 13          |
| Table E2   | 14          |
| Table E3   | 15          |
| Table E4   | 16          |
| Table E5   | 17          |
| Figure E1  | 18          |
| Figure E2  | 19          |
| Table E6   | 20          |
| Figure E3  | 21          |
| Figure E4  | 22          |
| Figure E5  | 23          |
| Figure E6  | 24          |
| Figure E7  | 25          |
| Figure E8  | 26          |
| Table E7   | 27          |
| Table E8   | 28          |
| Table E9   | 29          |
| Table E10  | 30          |
| Table E11  | 31          |
| Table E12  | 32          |
| Table E13  | 33          |

|            |                                                                                                                                                                                                                                                                                                             | <i>Page</i> |
|------------|-------------------------------------------------------------------------------------------------------------------------------------------------------------------------------------------------------------------------------------------------------------------------------------------------------------|-------------|
| Table E14  | Linear mixed-effects models of dose-adjusted $C_{\max}$ in log-transformed values for ethambutol in children and adolescents with tuberculosis, by patient characteristics.                                                                                                                                 | 34          |
| Table E15  | Multivariate linear mixed-effects analyses of factors associated with log-transformed $AUC_{0-24}$ values for isoniazid in children under 5 years of age with tuberculosis.                                                                                                                                 | 35          |
| Table E16  | Multivariate linear mixed-effects analyses of factors associated with log-transformed $C_{\max}$ values for isoniazid in children under 5 years of age with tuberculosis.                                                                                                                                   | 36          |
| Table E17  | Multivariate linear mixed-effects analyses of factors associated with log-transformed $AUC_{0-24}$ values for isoniazid in children under 2 years of age with tuberculosis.                                                                                                                                 | 37          |
| Table E18  | Multivariate linear mixed-effects analyses of factors associated with log-transformed $C_{\max}$ values for isoniazid in children under 2 years of age with tuberculosis.                                                                                                                                   | 38          |
| Table E19  | Multivariate linear mixed-effects analyses of factors associated with log-transformed $AUC_{0-24}$ values for first-line antituberculosis drugs in children and adolescents with tuberculosis who had pharmacokinetic sampling at steady state or approaching steady state                                  | 39          |
| Table E20  | Multivariate linear mixed-effects analyses of factors associated with log-transformed $C_{\max}$ values for first-line antituberculosis drugs in children and adolescents with tuberculosis who had pharmacokinetic sampling at steady state or approaching steady state.                                   | 40          |
| Table E21  | Multivariate linear mixed-effects analyses of factors associated with log-transformed $AUC_{0-24}$ values for first-line antituberculosis drugs, in children and adolescents with tuberculosis who had pharmacokinetic sampling at steady state or approaching steady state, and who received daily dosing. | 41          |
| Table E22  | Multivariate linear mixed-effects analyses of factors associated with log-transformed $C_{\max}$ values for first-line antituberculosis drugs, in children and adolescents with tuberculosis who had pharmacokinetic sampling at steady state or approaching steady state, and who received daily dosing.   | 42          |
| Table E23  | Multivariate linear mixed-effects analyses of factors associated with log-transformed $AUC_{0-24}$ values for first-line antituberculosis drugs in children and adolescents with tuberculosis, considering WHO region as a third-level clustering variable.                                                 | 43          |
| Table E24  | Multivariate linear mixed-effects analyses of factors associated with log-transformed $C_{\max}$ values for first-line antituberculosis drugs in children and adolescents with tuberculosis, considering WHO region as a third-level clustering variable.                                                   | 44          |
| Table E25  | Multivariate linear mixed-effects analyses on the effect of paediatric/adult dosing category on log-transformed $AUC_{0-24}$ values for isoniazid, rifampicin and pyrazinamide in tuberculosis patients weighing $\geq 25$ kg, adjusted for at least age, sex, nutritional status, and HIV status.          | 45          |
| Table E26  | Multivariate linear mixed-effects analyses on the effect of paediatric/adult dosing category on log-transformed $C_{\max}$ values for isoniazid, rifampicin and pyrazinamide in tuberculosis patients weighing $\geq 25$ kg, adjusted for at least age, sex, nutritional status, and HIV status.            | 46          |
| Table E27  | Summary estimates of $T_{\max}$ , $t_{1/2}$ , and $K_e$ for first-line antituberculosis drugs in children and adolescents with tuberculosis, by study characteristics.                                                                                                                                      | 47          |
| References |                                                                                                                                                                                                                                                                                                             | 48          |

## Appendix 1. Search strategy

### PubMed:

("Tuberculosis"[Mesh] OR tubercul\*[tiab] OR TB[tiab] OR TBC[tiab])  
AND  
("Antitubercular Agents"[Mesh] OR antitubercul\*[tiab] OR anti-tubercul\*[tiab] OR "anti-TB"[tiab] OR "Isoniazid"[Mesh] OR isoniazid[tiab] OR INH[tiab] OR "Rifampin"[Mesh] OR rifampi\*[tiab] OR RMP[tiab] OR RIF[tiab] OR "Pyrazinamide"[Mesh] OR pyrazinamide[tiab] OR PZA[tiab] OR "Ethambutol"[Mesh] OR ethambutol[tiab] OR EMB[tiab])  
AND  
("Pharmacokinetics"[Mesh] OR "pharmacokinetics"[Subheading] OR pharmacokinetic\*[tiab] OR PK OR kinetic\*[tiab] OR "clinical pharmacology"[tiab] OR AUC[tiab] OR AUCs[tiab] OR area under the curve\*[tiab] OR area under curve\*[tiab] OR Cmax[tiab] OR concentration\*[tiab] OR level\*[tiab] OR (drug\*[tiab] AND monitor\*[tiab]) OR (therapeutic[tiab] AND monitor\*[tiab]) OR TDM[tiab] OR exposure\*[tiab])  
AND  
("Child"[Mesh] OR "Infant"[Mesh] OR "Child, Preschool"[Mesh] OR "Infant, Newborn"[Mesh] OR child\*[tiab] OR pediater\*[tiab] OR paediatric\*[tiab] OR infant\*[tiab] OR baby[tiab] OR babies[tiab] OR toddler\*[tiab] OR kids[tiab] OR minors[tiab] OR newborn\*[tiab] OR neonate\*[tiab] OR "Adolescent"[Mesh] OR adolescen\*[tiab] OR teen\*[tiab] OR youth\*[tiab] OR young[tiab])

Total articles retrieved from PubMed between January 1<sup>st</sup>, 1990, and February 2<sup>nd</sup>, 2021: 2000.

Total articles retrieved from PubMed between February 3<sup>rd</sup>, 2021, and December 31<sup>st</sup>, 2021: 113.

### Embase:

('tuberculosis'/exp OR (tubercul\* OR TB OR TBC):ab,ti)  
AND  
('isoniazid'/exp OR 'rifampicin'/exp OR 'pyrazinamide'/exp OR 'ethambutol'/exp OR 'tuberculostatic agent'/exp OR (antitubercul\* OR 'anti-tubercul\*' OR 'anti-TB' OR isoniazid OR INH OR rifampi\* OR RMP OR RIF OR pyrazinamide OR PZA OR ethambutol OR EMB):ab,ti)  
AND  
('pharmacokinetics'/exp OR (pharmacokinet\* OR PK OR kinetic\* OR 'clinical pharmacology' OR AUC OR AUCs OR 'area under the curve\*' OR 'area under curve\*' OR Cmax OR concentration\* OR level\* OR (drug\* AND monitor\*)) OR (therapeutic AND monitor\*)) OR TDM OR exposure\*):ab,ti)  
AND  
('child'/exp OR 'adolescent'/exp OR 'infant'/exp OR (child\* OR pediater\* OR paediatric\* OR infant\* OR baby OR babies OR toddler\* OR kids OR minors OR newborn\* OR neonate\* OR adolescen\* OR teen\* OR youth OR young):ab,ti)

Total articles retrieved from Embase between January 1<sup>st</sup>, 1990, and February 2<sup>nd</sup>, 2021: 2416.

Total articles retrieved from Embase between February 3<sup>rd</sup>, 2021, and December 31<sup>st</sup>, 2021: 155

### **Web of Science:**

TS=(tuberculosis OR tubercul\* OR TB OR TBC)

AND

TS=(isoniazid OR INH OR rifampicin OR Rifampi\* OR RMP OR RIF OR pyrazinamide OR PZA OR ethambutol OR EMB OR antitubercul\* OR “anti-tubercul\*” OR “anti-TB”)

AND

TS=(Pharmacokinet\* OR PK OR kinetic\* OR “clinical pharmacology” OR AUC OR AUCs OR “area under the curve\*” OR “area under curve\*” OR Cmax OR concentration\* OR level\* OR (drug\* AND monitor\*) OR (therapeutic AND monitor\*) OR TDM OR exposure\*)

AND

TS=(child\* OR pediatr\* OR paediatr\* OR infant\* OR baby OR babies OR toddler\* OR kids OR minors OR newborn\* OR neonate\* OR adolescen\* OR youth OR teen\* OR young)

Total articles retrieved from Web of Science between January 1<sup>st</sup>, 1990, and February 2<sup>nd</sup>, 2021: 901.

Total articles retrieved from Web of Science between February 3<sup>rd</sup>, 2021, and December 31<sup>st</sup>, 2021: 79

## Appendix 2. Checklist and interpretation for quality assessment of included studies

In the absence of a validated tool for quality assessment of pharmacokinetic studies, we developed a checklist to assess the quality of included studies by including some relevant criteria according to the ROBINS-I tool for non-randomized studies of interventions,<sup>1</sup> supplemented by the proposed essential components required for a critical appraisal of clinical pharmacokinetic studies by Soliman et al.<sup>2</sup> The checklist was slightly modified to suit pharmacokinetic studies of first-line antituberculosis drugs in children and adolescents. An expert panel (DJT, MS, JS, and JWCA) evaluated and approved the components to be included in the checklist.

The maximum points obtained from this checklist is 33, including 12 points from the modified ROBINS-I tool,<sup>1</sup> and 21 points from the critical appraisal tool for clinical pharmacokinetic studies.<sup>2</sup> Every 'Yes' answer was given the corresponding two or one point, and every 'No/NA' answer was given zero point. Studies with a total of 23-33 points, 12-22 points, and  $\leq 11$  points, were classified as high, moderate, and low quality, respectively.

Below are the study specification, and items to be included in the checklist:

- Design : Pharmacokinetic or pharmacokinetic/pharmacodynamic study.
- Participants : Children and adolescents aged 0-18 years with tuberculosis.
- Intervention : First-line anti-TB drugs, including isoniazid, rifampicin, pyrazinamide and/or ethambutol.
- Comparator : None
- Outcomes : Pharmacokinetic measures or clinical responses to treatment, where applicable.

| Items adapted from the modified ROBINS-I tool. <sup>1</sup> |                                                                                                                                                                                                                                                                                                                                                                                                                             | Answer    | Point given |
|-------------------------------------------------------------|-----------------------------------------------------------------------------------------------------------------------------------------------------------------------------------------------------------------------------------------------------------------------------------------------------------------------------------------------------------------------------------------------------------------------------|-----------|-------------|
| <i>Bias due to confounding</i>                              |                                                                                                                                                                                                                                                                                                                                                                                                                             |           |             |
| 1.                                                          | No confounding is expected;                                                                                                                                                                                                                                                                                                                                                                                                 | Yes/No/NA | 2/0/0       |
|                                                             | or                                                                                                                                                                                                                                                                                                                                                                                                                          |           |             |
|                                                             | Confounding is expected but all known important confounding domains (e.g. co-administration of drugs or foods, liver/kidney impairment, and disease severity, younger vs older age, etc.) are appropriately measured and controlled for.                                                                                                                                                                                    | Yes/No/NA | 1/0/0       |
| <i>Bias due to selection of participants into the study</i> |                                                                                                                                                                                                                                                                                                                                                                                                                             |           |             |
| 2.                                                          | All patients who would have been eligible for the study were included (e.g., participants were consecutively included in the study); and for each participant, start of follow-up and start of intervention coincided;                                                                                                                                                                                                      | Yes/No/NA | 2/0/0       |
|                                                             | or                                                                                                                                                                                                                                                                                                                                                                                                                          |           |             |
|                                                             | Selection into the study may have been related to intervention and outcome, and the authors used appropriate methods to adjust for the selection bias; or start of follow-up and start of intervention do not coincided for all participants, and the proportion of participants for which this was the case was too low to induce important bias or the authors used appropriate methods to adjust for the selection bias. | Yes/No/NA | 1/0/0       |
| <i>Bias in classification of interventions</i>              |                                                                                                                                                                                                                                                                                                                                                                                                                             |           |             |
| 3.                                                          | Intervention status (drug and dosing characteristics) is well-defined; and intervention definition is based solely on information collected at the time of intervention and could have not been affected by knowledge of the outcome;                                                                                                                                                                                       | Yes/No/NA | 2/0/0       |
|                                                             | or                                                                                                                                                                                                                                                                                                                                                                                                                          |           |             |
|                                                             | Intervention status (drug and dosing characteristics) is well-defined; and some aspects of the assignments of intervention status were determined retrospectively (e.g., based on treatment guidelines recommended by authorities)                                                                                                                                                                                          | Yes/No/NA | 1/0/0       |
| <i>Bias due to missing data</i>                             |                                                                                                                                                                                                                                                                                                                                                                                                                             |           |             |
| 4.                                                          | Data were reasonably complete; or proportions of and reasons for missing participants were similar across intervention groups (if there was only one group of intervention                                                                                                                                                                                                                                                  | Yes/No/NA | 2/0/0       |

|                                                                                                         |                                                                                                                                                                                                                                                                                                                                                                                                                |           |       |
|---------------------------------------------------------------------------------------------------------|----------------------------------------------------------------------------------------------------------------------------------------------------------------------------------------------------------------------------------------------------------------------------------------------------------------------------------------------------------------------------------------------------------------|-----------|-------|
|                                                                                                         | available, the proportions of missing participants were similar between pre- and post-intervention); or the analysis addressed missing data and is likely to have removed any risk of bias.                                                                                                                                                                                                                    |           |       |
|                                                                                                         | or                                                                                                                                                                                                                                                                                                                                                                                                             |           |       |
|                                                                                                         | Proportions of and reasons for missing participants differ slightly across intervention groups (if there was only one group of intervention available, the proportions of missing participants differ slightly between pre- and post-intervention).                                                                                                                                                            | Yes/No/NA | 1/0/0 |
| <i>Bias in measurement of outcomes</i>                                                                  |                                                                                                                                                                                                                                                                                                                                                                                                                |           |       |
| 5.                                                                                                      | The methods of outcome assessment were comparable across intervention groups (if applicable); and the outcome measure was unlikely to be influenced by knowledge of the intervention received by study participants (i.e., is objective) or the outcome assessors were unaware of the intervention received by study participants; and any error in measuring the outcome is unrelated to intervention status. | Yes/No/NA | 2/0/0 |
|                                                                                                         | or                                                                                                                                                                                                                                                                                                                                                                                                             |           |       |
|                                                                                                         | The methods of outcome assessment were comparable across intervention groups; and the outcome measure is only minimally influenced by knowledge of the intervention received by study participants (e.g., the intervention received by study participants was according to the guidelines recommended by authorities); and any error in measuring the outcome is minimally related to intervention status.     | Yes/No/NA | 1/0/0 |
| <i>Bias in selection of the reported result</i>                                                         |                                                                                                                                                                                                                                                                                                                                                                                                                |           |       |
| 6.                                                                                                      | There is clear evidence (usually through examination of a pre-registered protocol or statistical analysis plan) that all reported results correspond to all intended outcomes, analyses and sub-cohorts;                                                                                                                                                                                                       | Yes/No/NA | 2/0/0 |
|                                                                                                         | or                                                                                                                                                                                                                                                                                                                                                                                                             |           |       |
|                                                                                                         | The outcome measurements and analyses are consistent with an a priori plan, or are clearly defined and both internally and externally consistent; and there is no indication of selection of the reported analysis from among multiple analyses; and there is no indication of selection of the cohort or subgroups for analysis and reporting on the basis of the results.                                    | Yes/No/NA | 1/0/0 |
| <b>Items adapted from the critical appraisal tool for clinical pharmacokinetic studies.<sup>2</sup></b> |                                                                                                                                                                                                                                                                                                                                                                                                                |           |       |
| <i>Appraising Background</i>                                                                            |                                                                                                                                                                                                                                                                                                                                                                                                                |           |       |
| 7.                                                                                                      | Was a clear description of the objectives of the study provided?                                                                                                                                                                                                                                                                                                                                               | Yes/No/NA | 1/0/0 |
|                                                                                                         | Authors should provide a clear statement of the objectives of the research to clarify the purpose and the scope of the study.                                                                                                                                                                                                                                                                                  |           |       |
| 8.                                                                                                      | Was a clear and comprehensive rationale provided to support the purpose of the study?                                                                                                                                                                                                                                                                                                                          | Yes/No/NA | 1/0/0 |
| <i>Appraising Study Design and Experimental Methods</i>                                                 |                                                                                                                                                                                                                                                                                                                                                                                                                |           |       |
| 9.                                                                                                      | Was the chosen study design appropriately selected and justified?                                                                                                                                                                                                                                                                                                                                              | Yes/No/NA | 1/0/0 |
| 10.                                                                                                     | [Slightly modified from the original version] Was the description of at least the drug dose (in mg or mg/kg of body weight) and dosing interval (single-dose, daily, or intermittent [trice weekly] dose, etc.), with addition of drug administration (taken whole by mouth, crushed/dispersed and taken via syringe/nasogastric tube, etc.) justified for the intended study?                                 | Yes/No/NA | 1/0/0 |
|                                                                                                         | Examples:<br>Authors should justify the use of single-dose versus steady-state dosing, daily versus intermittent dosing, flat-dosing versus weight-band dosing, etc.).                                                                                                                                                                                                                                         |           |       |
| 11.                                                                                                     | Were the outcome measures endpoints of the study appropriate to address the objectives of the study?                                                                                                                                                                                                                                                                                                           | Yes/No/NA | 1/0/0 |
| 12.                                                                                                     | Were the exclusion criteria of participants included and appropriate for the intended outcomes of the study?                                                                                                                                                                                                                                                                                                   | Yes/No/NA | 1/0/0 |

|                                                                                                                                                                                                                                                                                                                                                                                                                                                                                                                   |                                                                                                                                                                                                                                                                                                                                                                                                      |           |       |
|-------------------------------------------------------------------------------------------------------------------------------------------------------------------------------------------------------------------------------------------------------------------------------------------------------------------------------------------------------------------------------------------------------------------------------------------------------------------------------------------------------------------|------------------------------------------------------------------------------------------------------------------------------------------------------------------------------------------------------------------------------------------------------------------------------------------------------------------------------------------------------------------------------------------------------|-----------|-------|
| <p>Examples:<br/>The exclusion criteria should be relevant to assist with decreasing significant confounders (e.g. co-administration of drugs and foods, organ impairment, and special populations) that may impact outcomes</p>                                                                                                                                                                                                                                                                                  |                                                                                                                                                                                                                                                                                                                                                                                                      |           |       |
| 13.                                                                                                                                                                                                                                                                                                                                                                                                                                                                                                               | Were the relevant baseline characteristics of the participants adequately described?                                                                                                                                                                                                                                                                                                                 | Yes/No/NA | 1/0/0 |
| <p>Examples:<br/>Sex, race, age, weight, height, HIV status, nutritional status, concomitant disease, administered medications, severity of illness, and pharmacogenetics that may affect pharmacokinetic parameters, renal function, and hepatic function.</p>                                                                                                                                                                                                                                                   |                                                                                                                                                                                                                                                                                                                                                                                                      |           |       |
| 14.                                                                                                                                                                                                                                                                                                                                                                                                                                                                                                               | Were plausible interacting covariates described <i>a priori</i> or in post hoc evaluation?                                                                                                                                                                                                                                                                                                           | Yes/No/NA | 1/0/0 |
| <p>Examples:<br/>Demographic variables, laboratory values, concomitant medications, and relevant disease states to the drug being studied.</p>                                                                                                                                                                                                                                                                                                                                                                    |                                                                                                                                                                                                                                                                                                                                                                                                      |           |       |
| 15.                                                                                                                                                                                                                                                                                                                                                                                                                                                                                                               | Was the description of the used biological sample analytical methods or citations of prior validation studies provided in the publication or affiliated appendix?                                                                                                                                                                                                                                    | Yes/No/NA | 1/0/0 |
| <p>Examples:<br/>- Chromatography type.<br/>- Assay characteristics: mobile phase composition, gradient and flow rate, chromatographic column (packing material, dimensions).<br/>- Analytical runtime.<br/>- Operating temperature.<br/>- Detection type and parameters.<br/>- Validation method: specificity, recovery, linearity and sensitivity, the stability of the assay and its reproducibility. Refer also to EMA/FDA guidelines for bioanalytical method validation.</p>                                |                                                                                                                                                                                                                                                                                                                                                                                                      |           |       |
| 16.                                                                                                                                                                                                                                                                                                                                                                                                                                                                                                               | Was the method of data sampling of analytics appropriate for the study?                                                                                                                                                                                                                                                                                                                              | Yes/No/NA | 1/0/0 |
| <p>Examples:<br/>- First vs. zero order absorption, and lag time.<br/>- Evaluating for nonlinearity requires multiple dose levels and a complete profile is recommended.<br/>- Researchers obtain these data from previously conducted studies with completed concentration-time profile.<br/>- The method of data sampling should reference previously validated quantitative bioanalytical methods and if those are not available then the full description or defence of data sampling should be included.</p> |                                                                                                                                                                                                                                                                                                                                                                                                      |           |       |
| 17.                                                                                                                                                                                                                                                                                                                                                                                                                                                                                                               | Was a clear description of the sampling site provided and justified?                                                                                                                                                                                                                                                                                                                                 | Yes/No/NA | 1/0/0 |
| <p>Examples:<br/>- Sampling site should be consistent for all subjects in the study.<br/>- Venous sampling is preferable during frequent sampling schedule.</p>                                                                                                                                                                                                                                                                                                                                                   |                                                                                                                                                                                                                                                                                                                                                                                                      |           |       |
| 18.                                                                                                                                                                                                                                                                                                                                                                                                                                                                                                               | [Slightly modified from the original version] Was the number of samples taken within the sampling period appropriate for the assessment of total plasma exposure (i.e., area under the concentration-time curve from 0-24 h post-dose [AUC <sub>0-24</sub> ]), including assessment of AUC <sub>0-24</sub> using non-compartmental pharmacokinetic analysis or population pharmacokinetic modelling? | Yes/No/NA | 1/0/0 |
| <p>Examples:<br/>- Blood samples taken at 0, 1, 2, 4, and 8 h post-dose were considered sufficient for AUC<sub>0-24</sub> calculation of isoniazid, rifampicin, pyrazinamide, or ethambutol.<br/>- Other possible combinations of sampling time points (more points are preferable).</p>                                                                                                                                                                                                                          |                                                                                                                                                                                                                                                                                                                                                                                                      |           |       |
| 19.                                                                                                                                                                                                                                                                                                                                                                                                                                                                                                               | Were sample storage conditions appropriate and described in a manner that could be accurately replicated?                                                                                                                                                                                                                                                                                            | Yes/No/NA | 1/0/0 |
| <p>Examples:<br/>Sample storage, temperature, use and description of anticoagulants, stabilizers, centrifugation etc.</p>                                                                                                                                                                                                                                                                                                                                                                                         |                                                                                                                                                                                                                                                                                                                                                                                                      |           |       |

|                                                                                                                                                                                                                                                                                                                                                                                                                                                                                                                                                                                                                                                                                                    |                                                                                                                                      |           |       |
|----------------------------------------------------------------------------------------------------------------------------------------------------------------------------------------------------------------------------------------------------------------------------------------------------------------------------------------------------------------------------------------------------------------------------------------------------------------------------------------------------------------------------------------------------------------------------------------------------------------------------------------------------------------------------------------------------|--------------------------------------------------------------------------------------------------------------------------------------|-----------|-------|
| 20.                                                                                                                                                                                                                                                                                                                                                                                                                                                                                                                                                                                                                                                                                                | If applicable, was there a clear description of the pharmacokinetic model, its development, validation and justification for use?    | Yes/No/NA | 1/0/0 |
| <p>It is recommended to provide the following details about the selected modelling process:</p> <ul style="list-style-type: none"><li>- Description of studies from which dataset was driven</li><li>- Model structure</li><li>- Validated software for the pharmacokinetic analysis</li><li>- Criteria for accepting valid model's parameters</li><li>- Fitting procedure defined prior to the initiation of the analysis.</li><li>- A reasonable assumption based on which the scheme for weighting is considered to be appropriate and the transformation of data [e.g. logarithmic transformation to achieve the homoscedastic (constant) variance requirements] should be provided.</li></ul> |                                                                                                                                      |           |       |
| 21.                                                                                                                                                                                                                                                                                                                                                                                                                                                                                                                                                                                                                                                                                                | If applicable, was the described population pharmacokinetic approach validation method appropriate for the analysis?                 | Yes/No/NA | 1/0/0 |
| <p>Examples:</p> <ul style="list-style-type: none"><li>- Basic internal method (e.g., visual predictive checks [VPCs], goodness-of-fit [GOF] plot)</li><li>- Advanced internal method</li><li>- External model evaluation</li></ul>                                                                                                                                                                                                                                                                                                                                                                                                                                                                |                                                                                                                                      |           |       |
| 22.                                                                                                                                                                                                                                                                                                                                                                                                                                                                                                                                                                                                                                                                                                | Were the essential pharmacokinetic parameters required to make the results applicable in clinical settings included?                 | Yes/No/NA | 1/0/0 |
| <p>Examples:</p> <p>Primary parameters for non-compartmental PK (AUC and C<sub>max</sub>) and for population PK (total clearance [CL] and volume of distribution at steady state [V<sub>ss</sub>]). Other secondary parameters, if applicable: terminal half-life (t<sub>1/2</sub>), fraction of the unbound drug in plasma (fu), absorption rate constant (Ka), C<sub>min</sub>, t<sub>max</sub>, etc.</p>                                                                                                                                                                                                                                                                                        |                                                                                                                                      |           |       |
| 23.                                                                                                                                                                                                                                                                                                                                                                                                                                                                                                                                                                                                                                                                                                | Were the pharmacokinetic equations used to calculate the patient's pharmacokinetic parameters presented or cited within the article? | Yes/No/NA | 1/0/0 |
| <p>Examples:</p> <p>Equations used to calculate the following pharmacokinetic parameters: creatinine clearance, body weight calculations, elimination rate constant, elimination half-life, area under the concentration-time curve, clearance, volume of distribution, etc.</p>                                                                                                                                                                                                                                                                                                                                                                                                                   |                                                                                                                                      |           |       |
| <i>Appraising Applied Statistics</i>                                                                                                                                                                                                                                                                                                                                                                                                                                                                                                                                                                                                                                                               |                                                                                                                                      |           |       |
| 24                                                                                                                                                                                                                                                                                                                                                                                                                                                                                                                                                                                                                                                                                                 | Were the chosen statistical tests and software to perform the statistical analysis appropriate to achieve the study objectives?      | Yes/No/NA | 1/0/0 |
| <i>Appraising Results</i>                                                                                                                                                                                                                                                                                                                                                                                                                                                                                                                                                                                                                                                                          |                                                                                                                                      |           |       |
| 25                                                                                                                                                                                                                                                                                                                                                                                                                                                                                                                                                                                                                                                                                                 | Were all patients enrolled in the study accounted for?                                                                               | Yes/No/NA | 1/0/0 |
| <p>Examples:</p> <p>Description of patient screening, enrolment, run-in or wash out phases, study period and follow-up periods are adequately described. Any loss to follow-up or withdrawals are described.</p>                                                                                                                                                                                                                                                                                                                                                                                                                                                                                   |                                                                                                                                      |           |       |
| 26                                                                                                                                                                                                                                                                                                                                                                                                                                                                                                                                                                                                                                                                                                 | In the event of missing data or outliers, was the process for analysis justified and appropriate?                                    | Yes/No/NA | 1/0/0 |
| 27                                                                                                                                                                                                                                                                                                                                                                                                                                                                                                                                                                                                                                                                                                 | Were appropriate summary statistics to describe centrality and variance used to present the pharmacokinetic results?                 | Yes/No/NA | 1/0/0 |
| <p>Examples:</p> <p>Descriptive statistics such as confidence interval, standard deviation, mean, median, range, interquartile range, standard error and trimmed range.</p>                                                                                                                                                                                                                                                                                                                                                                                                                                                                                                                        |                                                                                                                                      |           |       |

### Appendix 3. Requested variables from contacted authors with individual-patient data

|                                                                                                                                                                                          |
|------------------------------------------------------------------------------------------------------------------------------------------------------------------------------------------|
| Demographic characteristics:                                                                                                                                                             |
| Age (in years)*                                                                                                                                                                          |
| Sex (male/female)                                                                                                                                                                        |
| Site of study                                                                                                                                                                            |
| Weight (in kg)*                                                                                                                                                                          |
| Height (in cm)                                                                                                                                                                           |
| Clinical characteristics:                                                                                                                                                                |
| Type of tuberculosis (pulmonary, extrapulmonary, and pulmonary + extrapulmonary)                                                                                                         |
| HIV status (positive, negative, and unknown)                                                                                                                                             |
| NAT2 genotypes and acetylator status (slow, intermediate, or rapid acetylator) for isoniazid                                                                                             |
| SLCO1B1 genotypes for rifampicin                                                                                                                                                         |
| Serum creatinine (in mg/dL)*                                                                                                                                                             |
| Serum albumin (in g/dL)*                                                                                                                                                                 |
| Drug and dosing characteristics:                                                                                                                                                         |
| Drug formulation and administration (taken whole tablet orally, crushed tablet swallowed orally or delivered via syringe or nasogastric tube, liquid formulation delivered orally, etc.) |
| Dose-date                                                                                                                                                                                |
| Dose-time (clock time)                                                                                                                                                                   |
| Dose-amount administered (in mg)                                                                                                                                                         |
| Dosing interval (daily or intermittent [e.g. thrice weekly] dosing)                                                                                                                      |
| Confirmation of drug administration at steady state                                                                                                                                      |
| Pharmacokinetic information:                                                                                                                                                             |
| Sampling date                                                                                                                                                                            |
| Sampling time (clock time)                                                                                                                                                               |
| Observed plasma concentrations (in mg/L)                                                                                                                                                 |

\*At baseline and at pharmacokinetic sampling, if both are available. HIV: human immunodeficiency virus; NAT2: N-acetyltransferase 2; SLCO1B1: solute carrier organic anion transporter 1B1.

#### Appendix 4. Methods used in the classification of acetylator status of isoniazid.

Acetylator status was defined genotypically based on arylamine N-acetyltransferase 2 (NAT2) genotypes), and phenotypically based on isoniazid elimination half-life ( $t_{1/2}$ ).

Genotypically, acetylator status was defined based on analysis of arylamine N-acetyltransferase 2 (NAT2) genetic polymorphisms. Data on N-acetyltransferase 2 (NAT2) genotypes were available from eight studies for which AUC<sub>0-24</sub> and C<sub>max</sub> values for isoniazid could be assessed. In six studies (Schaaf et al., 2005;<sup>3</sup> McIlleron et al., 2009;<sup>4</sup> Thee et al., 2011;<sup>5</sup> Verhagen et al., 2012;<sup>6</sup> Ibrahim et al., 2013;<sup>7</sup> and Denti et al., 2021 [Desmond Tutu TB Center study site]<sup>8</sup>), NAT2 genotypes were evaluated according to several established methods for the NAT2\*4, NAT2\*5, NAT2\*6, NAT2\*7, NAT2\*12, NAT2\*13, NAT2\*14 alleles.<sup>9,10</sup> In these studies, allele characterization and designation were performed using NAT2 allele nomenclature consensus.<sup>11,12</sup> Based on this nomenclature, the wild-type rapid alleles (R) were assigned as NAT2\*4, NAT2\*12, and NAT2\*13, while decreased NAT2 enzyme activity is encoded by NAT2\*5, NAT2\*6, NAT2\*7, and NAT2\*14 alleles, which define the slow mutant alleles (S). Depending on the allele combinations observed, the study participants were classified as homozygous rapid (RR), heterozygous intermediate (RS), or homozygous slow (SS) acetylators. Single-nucleotide polymorphisms (SNPs) genotyping were used in three studies, including one SNP (rs1495741) in Denti et al study (Red Cross Children Hospital study site),<sup>8</sup> four SNPs (rs1801279 [191G>A], rs1801280 [341T>C], rs1799930 [590G>A], and rs1799931 [857G>A]) in Antwi et al study,<sup>13</sup> and three SNPs (rs1801280 [341T>C], rs1799930 [590G>A] and rs1208 [803A>G]) in van Aartsen et al study.<sup>14</sup> For each of the three- and four-SNP panel assays, samples homozygous common for all SNPs were classified as rapid acetylator phenotype, samples heterozygous for any of one of the SNPs were classified as intermediate acetylator phenotype, and samples homozygous variant for one or more SNPs or heterozygous for two or more SNPs were classified as slow acetylator phenotype.<sup>15</sup>

Phenotypically, acetylator status was defined based on isoniazid elimination half-life ( $t_{1/2}$ ), in which patients were categorized as rapid ( $t_{1/2} < 1.25$  h), intermediate ( $1.25 \text{ h} \leq t_{1/2} \leq 2 \text{ h}$ ), and slow ( $t_{1/2} > 2 \text{ h}$ ) acetylator phenotypes.<sup>16</sup>

## Appendix 5. Pharmacokinetic assessments

Drug concentrations below the lower limit of quantification (LLOQ) before the time to maximum concentration ( $T_{\max}$ ) were set to half of the LLOQ assuming the drug concentrations to be at steady state ( $\geq 14$  days after the first dose) or approaching steady state (7-11 days after the first dose), and were set to zero following first dose. After  $T_{\max}$ , the first LLOQ values were set to half the LLOQ and subsequent LLOQ values were removed from the analysis. Outliers of concentration-time data points were carefully identified by visual inspection and pharmacokinetic plausibility (e.g., data points deviating more than three times the interquartile range). Two reviewers (FG and JS) first identified the possible outliers of drug concentration data. After consultation and agreement with a third reviewer (JWCA), outliers were then excluded from further pharmacokinetic and statistical analyses.

All pharmacokinetic parameters in patients with intensive sampling (Table E2;  $n=35$  studies)<sup>3-8,13,14,17-43</sup> were calculated non-compartmentally with the *PKNCA* package (version 0.9.4) in R for Windows; sparse sampling data, especially in four studies were excluded from the analysis.<sup>44-47</sup> Assessment of individual parameters included area under the concentration-time curve during the daily dosing interval from 0-24 h post-dose ( $AUC_{0-24}$ ), peak plasma concentration ( $C_{\max}$ ), time to reach peak plasma concentration ( $T_{\max}$ ), first order elimination rate constant ( $K_e$ ), and elimination half-life ( $t_{1/2}$ ). Both  $C_{\max}$  and  $T_{\max}$  were derived directly from the concentration-time observations.  $K_e$  and its individual derived parameters (e.g.  $t_{1/2}$ ) were excluded from analysis when  $K_e$  could not be estimated over at least three data points on the apparent terminal slope. Exclusion was done in the following cases: poor fit (adjusted  $R$ -squared  $< 0.5$ ), a non-positive value for  $K_e$ , and if less than two of the data points were taken after  $T_{\max}$ .

If drug concentration at pre-dose ( $C_0$ ) was not measured,  $C_0$  was assumed to reflect the concentration at 24 h post-dose at steady-state or approaching steady-state ( $C_0 = C_{24}$ ). In studies where patients received first-line antituberculosis drugs at first dose,  $C_0$  was set to zero. If  $C_{24}$  was not measured, it was estimated using the equation:  $C_{24} = C_{\text{last}} \times e^{-K_e \times (24 - T_{\text{last}})}$ , in which  $C_{\text{last}}$  is the last measurable concentration at  $T_{\text{last}}$ . For individuals where  $K_e$  could not reliably be estimated over at least three data points on the apparent terminal slope,  $C_{24}$  was assumed to reflect the concentration at pre-dose at steady-state ( $C_{24} = C_0$ ). In this case, a virtual  $C_{24}$  with the same plasma concentration as  $C_0$  was added. The calculation of  $AUC_{0-24}$  was performed using the linear-up/log-down trapezoidal method. For reporting,  $AUC_{0-24}$  and  $C_{\max}$  data from a larger group of studies with steady-state concentrations, were combined with data from two studies with drug concentrations approaching steady state.<sup>21,35</sup>

**Table E1. Excluded studies with identical or overlapping cohorts with original eligible studies for which individual patient data were or were not provided.**

| No | Publication details of studies with identical or overlapping cohorts with original studies                                                                                                                                                                             | Original studies                                                                                                  |
|----|------------------------------------------------------------------------------------------------------------------------------------------------------------------------------------------------------------------------------------------------------------------------|-------------------------------------------------------------------------------------------------------------------|
| 1  | Aruldas BW, et al. Optimization of dosing regimens of isoniazid and rifampicin in children with tuberculosis in India. <i>Br Clin Pharmacol</i> . 2019;85(3):644-654.                                                                                                  | Ranjalkar et al., 2018. <sup>30</sup>                                                                             |
| 2  | Dompheh A, et al. Effect of genetic variation of NAT2 on isoniazid and SLCO1B1 and CES2 on rifampicin pharmacokinetics in Ghanaian children with tuberculosis. <i>Antimicrob Agents Chemother</i> . 2018;62(3):e02099-17.                                              | Antwi et al., 2017. <sup>13</sup>                                                                                 |
| 3  | Gent WL, et al. Factors in hydrazine formation from isoniazid by pediatric and adult patients. <i>Eur J Clin Pharmacol</i> . 1992;43(2):131-6.                                                                                                                         | Donald et al., 1992. <sup>48</sup>                                                                                |
| 4  | Guiastrenne B, et al. Suboptimal antituberculosis drug concentrations and outcomes in small and HIV-coinfected children in India: Recommendations for dose modifications. <i>Clin Pharmacol Ther</i> . 2018;104(4):733-741.                                            | Ramachandran et al., 2013 & 2015. <sup>27,28</sup>                                                                |
| 5  | Horita Y, et al. Evaluation of the adequacy of WHO revised dosages of the first-line antituberculosis drugs in children with tuberculosis using population pharmacokinetic modelling and simulations. <i>Antimicrob Agents Chemother</i> . 2018;62(9):e00008-18.       | Antwi et al., 2017. <sup>13</sup>                                                                                 |
| 6  | Panjasawatwong N, et al. Population pharmacokinetic properties of antituberculosis drugs in Vietnamese children with tuberculosis meningitis. <i>Antimicrob Agents Chemother</i> . 2020;65(1):e00487.                                                                  | Pouplin et al., 2016. <sup>46</sup>                                                                               |
| 7  | Pariente-Khayat A, et al. Isoniazid acetylation metabolic ratio during maturation in children. <i>Clin Pharmacol Ther</i> . 1997;62(4):377-83.                                                                                                                         | Rey et al., 1998. <sup>49</sup>                                                                                   |
| 8  | Ramachandran G, et al. Low serum concentrations of rifampicin and pyrazinamide associated with poor treatment outcomes in children with tuberculosis related to HIV status. <i>Pediatr Infect Dis J</i> . 2016;35(5):530-4.                                            | Ramachandran et al., 2013 & 2015. <sup>27,28</sup>                                                                |
| 9  | Rogers et al. The non-linear child: Ontogeny, isoniazid concentration, and NAT2 genotype modulate enzyme reaction kinetics and metabolism. <i>EBioMedicine</i> . 2016;11:118-126.                                                                                      | Hiruy et al., 2015. <sup>50</sup>                                                                                 |
| 10 | Savic RM, et al. Pediatric tuberculous meningitis: Model-based approach to determining optimal doses of the antituberculosis drugs rifampicin and levofloxacin for children. <i>Clin Pharmacol Ther</i> . 2015;98(6):622-9.                                            | McIlleron et al., 2009 & 2011; <sup>4,23</sup> Schaaf et al., 2009; <sup>36</sup> Thee et al., 2011. <sup>5</sup> |
| 11 | Seneadza NAH, et al. Effect of malnutrition on the pharmacokinetics of anti-TB drugs in Ghanaian children. <i>Int J Tuberc Lung Dis</i> . 2021;25(1):36-42                                                                                                             | Antwi et al., 2017. <sup>13</sup>                                                                                 |
| 12 | Swaminathan S, et al. Drug concentration thresholds predictive of therapy failure and death in children with tuberculosis: Bread crumb trails in random forests. <i>Clin Infect Dis</i> . 2016;63:S63-S74                                                              | Ramachandran et al., 2013 & 2015. <sup>27,28</sup>                                                                |
| 13 | Verhagen LM, et al. Full-gene sequencing analysis of NAT2 and its relationship with isoniazid pharmacokinetics in Venezuelan children with tuberculosis. <i>Pharmacogenomics</i> . 2014;15(3):285-96                                                                   | Verhagen et al., 2012. <sup>6</sup>                                                                               |
| 14 | Yang H, et al. Evaluation of the adequacy of the 2010 revised World Health Organization recommended dosages of the first-line antituberculosis drugs for children: Adequacy of revised dosages of TB drugs for children. <i>Pediatr Infect Dis</i> . 2018;37(1):43-51. | Antwi et al., 2017. <sup>13</sup>                                                                                 |
| 15 | Zvada S, et al. Population pharmacokinetics of rifampicin, pyrazinamide and isoniazid in children with tuberculosis: in silico evaluation of currently recommended doses. <i>J Antimicrob Chemother</i> . 2014;69(5):1339-49.                                          | McIlleron et al., 2009 & 2011; <sup>4,23</sup> Schaaf et al., 2009; <sup>36</sup> Thee et al., 2011. <sup>5</sup> |
| 16 | Bekker A, et al. Pharmacokinetics of rifampicin, isoniazid, pyrazinamide, and ethambutol in infants dosed according to revised WHO-recommended treatment guidelines. <i>Antimicrob Agents Chemother</i> . 2016;60(4):2171-2179                                         | Denti et al., 2022. <sup>8</sup>                                                                                  |
| 17 | Szipszky C, et al. Determination of rifampicin concentrations by urine colorimetry and mobile phone readout for personalized dosing in tuberculosis treatment. <i>J Pediatr Infect Dis Soc</i> . 2021;10(2):104-111.                                                   | Van Aartsen et al., 2022. <sup>14</sup>                                                                           |
| 18 | Kwara A, et al. Pharmacokinetics of first-line antituberculosis drugs using WHO revised dosage in children with tuberculosis with and without HIV coinfection. <i>J Pediatr Infect Dis Soc</i> . 2016;5(4):356-65.                                                     | Antwi et al., 2017. <sup>13</sup>                                                                                 |
| 19 | McIlleron H, et al. Bioavailability of two licensed paediatric rifampicin suspensions: implications for quality control programmes. <i>Int J Tuberc Lung Dis</i> . 2016;20(7):915-919.                                                                                 | Denti et al., 2022. <sup>8</sup>                                                                                  |
| 20 | Arya A, et al. Pharmacokinetics of rifampicin in North Indian children with tuberculosis at doses administered under the revised national tuberculosis control program India. <i>Indian J Pharmacol</i> . 2013;45:S102-103.                                            | Arya et al., 2015. <sup>42</sup>                                                                                  |
| 21 | Justine M, et al. Therapeutic drug levels of first-line tuberculosis medications among children from rural Tanzania. <i>Am J trop Med Hyg</i> . 2017;97(5):581                                                                                                         | Justine et al., 2020. <sup>44</sup>                                                                               |

**Table E2. Demographic information of all included studies for which individual patient data were provided.**

| No | Authors                            | Year of publication | Country              | N patients included | Median age (IQR), years | INH | RIF | PZA | EMB | PK sampling time-points, (h)       | Intensive sampling | Steady-state PK |
|----|------------------------------------|---------------------|----------------------|---------------------|-------------------------|-----|-----|-----|-----|------------------------------------|--------------------|-----------------|
| 1  | Antwi et al. <sup>13</sup>         | 2017                | Ghana                | 113                 | 5.0 (2.2-8.2)           | Yes | Yes | Yes | Yes | 0, 2, 4, 8                         | Yes                | Yes             |
| 2  | Arya et al. <sup>42</sup>          | 2015                | India                | 20                  | 10.0 (9.0-12.0)         | No  | Yes | No  | No  | 1, 2, 3, 4, 6, 8, 12               | Yes                | No              |
| 3  | Chabala et al. <sup>43</sup>       | 2022                | South Africa, Zambia | 77                  | 3.7 (1.4-6.6)           | Yes | Yes | Yes | Yes | 1, 2, 4, 6, 8, 12                  | Yes                | Yes             |
| 4  | Dayal et al. <sup>17</sup>         | 2018                | India                | 37                  | 8.0 (3.0-10.0)          | Yes | No  | Yes | No  | 0, 2, 4, 6, 8                      | Yes                | Yes             |
| 5  | Denti et al. <sup>8,§</sup>        | 2022                | South Africa, Malawi | 184                 | 2.0 (0.9-4.9)           | Yes | Yes | Yes | No  | 0, 1, 2, 4, 6, 8                   | Yes                | Yes             |
| 6  | Garcia-Prats et al. <sup>18</sup>  | 2021                | South Africa         | 60                  | 2.1 (1.1-4.4)           | No  | Yes | No  | No  | 0, 1, 2, 4, 6, 8, 24               | Yes                | Yes             |
| 7  | Graham et al. <sup>19</sup>        | 2006                | Malawi               | 27/18               | 4.1 (2.2-9.6)           | No  | No  | Yes | Yes | 0, 2, 3, 4, 7, 24, 48              | Yes                | No              |
| 8  | Gupta et al. <sup>20</sup>         | 2008                | India                | 20                  | 10.0 (6.7-12.0)         | No  | No  | Yes | No  | 0, 1, 2, 4, 6, 8, 12, 24           | Yes                | No              |
| 9  | Ibrahim et al. <sup>7</sup>        | 2013                | Ethiopia             | 29                  | 9.5 (6.0-9.5)           | Yes | No  | No  | No  | 2, 3, 4, 5                         | Yes                | No              |
| 10 | Justine et al. <sup>44</sup>       | 2020                | Tanzania             | 51                  | 5.3 (2.4-9.5)           | Yes | Yes | Yes | Yes | 2                                  | No                 | Yes             |
| 11 | Martial et al. <sup>21</sup>       | 2018                | Paraguay             | 15                  | 1.5 (0.9-2.7)           | Yes | Yes | Yes | Yes | 0, 2, 4, 8                         | Yes                | Yes             |
| 12 | Mave et al. <sup>22</sup>          | 2017                | India                | 16                  | 7.7 (5.2-8.9)           | Yes | No  | No  | No  | 0, 2, 4, 6                         | Yes                | Yes             |
| 13 | McIlleron et al. <sup>4</sup>      | 2009                | South Africa         | 56                  | 3.2 (1.5-5.4)           | Yes | No  | No  | No  | 0.75, 1.5, 3, 4, 6                 | Yes                | Yes             |
| 14 | McIlleron et al. <sup>23</sup>     | 2011                | South Africa         | 34                  | 3.1 (1.5-5.2)           | No  | No  | Yes | No  | 0.75, 1.5, 3, 4, 6                 | Yes                | Yes             |
| 15 | Mlotha et al. <sup>24</sup>        | 2014                | Malawi               | 30                  | 7.5 (1.7-10.9)          | Yes | Yes | Yes | Yes | 0, 0.5, 1, 2, 3, 4, 6, 8, 24       | Yes                | Yes             |
| 16 | Mlotha et al. <sup>45</sup>        | unpublished         | Malawi               | 47                  | 6.2 (2.5-8.1)           | Yes | No  | Yes | Yes | (0, 0.5, 1, 2, 3, 4, 6, 8)*        | No                 | Yes             |
| 17 | Mukherjee et al. <sup>25</sup>     | 2015                | India                | 127                 | 9.4 (6.1-11.6)          | Yes | Yes | Yes | Yes | 0, 1, 2, (3)*, 4                   | Yes                | Yes             |
| 18 | Mukherjee et al. <sup>26</sup>     | 2016                | India                | 24                  | 9.7 (6.7-11.1)          | Yes | Yes | Yes | Yes | 0, 1, 2, (3)*, 4                   | Yes                | Yes             |
| 19 | Pouplin et al. <sup>46</sup>       | 2016                | Vietnam              | 99                  | 3.0 (1.0-7.0)           | Yes | Yes | Yes | No  | (1, 2, 3, 4, 5, 6, 8, 12, 18, 24)* | No                 | Yes             |
| 20 | Ramachandran et al. <sup>27</sup>  | 2013                | India                | 84                  | 7.0 (4.0-10.0)          | Yes | Yes | Yes | No  | 0, 2, 4, 6, 8                      | Yes                | Yes             |
| 21 | Ramachandran et al. <sup>28</sup>  | 2015                | India                | 77                  | 9.0 (7.0-11.0)          | Yes | Yes | Yes | No  | 0, 2, 4, 6, 8                      | Yes                | Yes             |
| 22 | Rangari et al. <sup>29</sup>       | 2015                | India                | 20                  | 10.5 (8.7-11.0)         | Yes | No  | No  | No  | 0, 1, 2, 4, 6, 10, 24              | Yes                | No              |
| 23 | Ranjalkar et al. <sup>30</sup>     | 2018                | India                | 39                  | 6.8 (3.4-13.5)          | Yes | Yes | No  | No  | 0.5, 1, 1.5, 2, 2.5, 4, 6          | Yes                | Yes             |
| 24 | Roy et al. <sup>31</sup>           | 1996                | India                | 20                  | 8.0 (7.0-10.0)          | Yes | No  | No  | No  | 0, 1, 2, 3, 6, 24                  | Yes                | Yes             |
| 25 | Roy et al. <sup>32</sup>           | 1999                | India                | 10                  | 8.0 (7.0-9.7)           | No  | No  | Yes | No  | 0, 1, 2, 4, 6, 12, 24              | Yes                | No              |
| 26 | Roy et al. <sup>33</sup>           | 2010                | India                | 20                  | 9.0 (8.0-10.0)          | Yes | No  | No  | No  | 0, 1, 2, 4, 6, 8, 24               | Yes                | No              |
| 27 | Roy et al. <sup>34</sup>           | 2012                | India                | 20                  | 5.5 (5.0-6.0)           | No  | No  | Yes | No  | 0, 1, 2, 4, 6, 8, 12, 24           | Yes                | No              |
| 28 | Ruslami et al. <sup>35,§</sup>     | 2021                | Indonesia            | 20                  | 11.4 (6.2-14.0)         | Yes | Yes | Yes | No  | 0, 1, 2, 4, 8                      | Yes                | No/Yes          |
| 29 | Schaaf et al. <sup>3</sup>         | 2005                | South Africa         | 64                  | 3.7 (1.8-7.7)           | Yes | No  | No  | No  | 2, 3, 4, 5                         | Yes                | Yes             |
| 30 | Schaaf et al. <sup>36</sup>        | 2009                | South Africa         | 54                  | 3.2 (1.5-1.4)           | No  | Yes | No  | No  | 0.75, 1.5, 3, 4, 6                 | Yes                | Yes             |
| 31 | Schipani et al. <sup>47</sup>      | 2016                | Malawi               | 50                  | 6.2 (2.5-8.1)           | No  | Yes | No  | No  | (0, 0.5, 1, 2, 3, 4, 6, 8)*        | No                 | Yes             |
| 32 | Shah et al. <sup>37</sup>          | 2019                | India                | 36                  | 7.0 (3.9-11.0)          | Yes | No  | No  | No  | 0, 1, 2, 3, 6, 24                  | Yes                | Yes             |
| 33 | Shah et al. <sup>38</sup>          | 2020                | India                | 24                  | 6.5 (3.0-10.1)          | Yes | No  | No  | No  | 0, 2, 4, 6, 8                      | Yes                | Yes             |
| 34 | Thee et al. <sup>5</sup>           | 2011                | South Africa         | 20                  | 1.0 (0.8-1.6)           | Yes | Yes | Yes | No  | 0.5, 1.5, 3, 5                     | Yes                | Yes             |
| 35 | Van Aartsen et al. <sup>14,§</sup> | 2022                | Tanzania             | 51                  | 2.2 (1.3-5.2)           | Yes | Yes | Yes | Yes | 1, 2, 6                            | Yes                | Yes             |
| 36 | Verhagen et al. <sup>6</sup>       | 2012                | Venezuela            | 30                  | 3.8 (2.6-8.3)           | Yes | Yes | Yes | Yes | 0, 2, 4, 8                         | Yes                | Yes             |
| 37 | Tikiso et al. <sup>41,§</sup>      | 2022                | South Africa, Malawi | 79                  | 2.9 (1.0-6.8)           | No  | No  | No  | Yes | 0, 1, 2, 4, 6, 8                   | Yes                | Yes             |
| 38 | Zhu et al. <sup>39</sup>           | 2002                | United States        | 24                  | 3.9 (2.3-5.2)           | No  | No  | Yes | No  | 0, 0.5, 1, 2, 6, 10                | Yes                | Yes             |
| 39 | Zhu et al. <sup>40</sup>           | 2004                | United States        | 19                  | 4.8 (3.5-8.1)           | No  | No  | No  | Yes | 0, 0.5, 1, 2, 6, 10                | Yes                | Yes             |

\*Randomly performed in  $\leq 2$  sampling-time points for each sampling occasion. INH: isoniazid; RIF: rifampicin; PZA: pyrazinamide; EMB: ethambutol; IQR: interquartile range; PK: pharmacokinetics. §Raw data were obtained through contact with investigators before the official publication of the studies.

**Table E3. Quality assessment results of the included studies for which individual patient data were provided.**

| No | Authors                           | Items included in the developed checklist for quality assessment of included studies (details are shown in Appendix 2) |   |   |   |   |   |   |   |   |    |    |    |    |    |    |    |    |    |    |    |    |    |    |    |    |    |    | Total points | Quality |
|----|-----------------------------------|------------------------------------------------------------------------------------------------------------------------|---|---|---|---|---|---|---|---|----|----|----|----|----|----|----|----|----|----|----|----|----|----|----|----|----|----|--------------|---------|
|    |                                   | 1                                                                                                                      | 2 | 3 | 4 | 5 | 6 | 7 | 8 | 9 | 10 | 11 | 12 | 13 | 14 | 15 | 16 | 17 | 18 | 19 | 20 | 21 | 22 | 23 | 24 | 25 | 26 | 27 |              |         |
| 1  | Antwi et al. <sup>13</sup>        | 1                                                                                                                      | 1 | 1 | 1 | 1 | 2 | 1 | 1 | 1 | 1  | 1  | 1  | 1  | 0  | 1  | 1  | 1  | 1  | 1  | 0  | 0  | 1  | 0  | 1  | 1  | 0  | 1  | 23           | +++     |
| 2  | Arya et al. <sup>42</sup>         | 1                                                                                                                      | 1 | 1 | 1 | 1 | 0 | 1 | 1 | 1 | 1  | 1  | 1  | 1  | 0  | 1  | 1  | 1  | 1  | 1  | 0  | 0  | 1  | 0  | 1  | 1  | 0  | 1  | 21           | ++      |
| 3  | Chabala et al. <sup>43</sup>      | 1                                                                                                                      | 2 | 1 | 1 | 1 | 2 | 1 | 1 | 1 | 1  | 1  | 1  | 1  | 0  | 1  | 1  | 1  | 1  | 1  | 0  | 0  | 1  | 1  | 1  | 1  | 0  | 1  | 25           | +++     |
| 4  | Dayal et al. <sup>17</sup>        | 1                                                                                                                      | 1 | 1 | 1 | 1 | 0 | 1 | 1 | 1 | 1  | 1  | 1  | 1  | 1  | 1  | 1  | 1  | 1  | 1  | 0  | 0  | 1  | 1  | 1  | 1  | 0  | 1  | 23           | +++     |
| 5  | Denti et al. <sup>8</sup>         | 2                                                                                                                      | 2 | 2 | 2 | 1 | 2 | 1 | 1 | 1 | 1  | 1  | 1  | 1  | 1  | 1  | 1  | 1  | 1  | 1  | 1  | 1  | 1  | 1  | 1  | 1  | 1  | 1  | 32           | +++     |
| 6  | Garcia-Prats et al. <sup>18</sup> | 2                                                                                                                      | 2 | 2 | 2 | 1 | 1 | 1 | 1 | 1 | 1  | 1  | 1  | 1  | 1  | 1  | 1  | 1  | 1  | 1  | 1  | 1  | 1  | 1  | 1  | 1  | 1  | 1  | 31           | +++     |
| 7  | Graham et al. <sup>19</sup>       | 1                                                                                                                      | 2 | 1 | 2 | 1 | 0 | 1 | 1 | 1 | 1  | 1  | 1  | 1  | 0  | 1  | 1  | 1  | 1  | 1  | 0  | 0  | 1  | 1  | 1  | 1  | 0  | 1  | 24           | +++     |
| 8  | Gupta et al. <sup>20</sup>        | 0                                                                                                                      | 1 | 1 | 0 | 1 | 0 | 1 | 1 | 1 | 1  | 1  | 1  | 1  | 0  | 1  | 1  | 1  | 1  | 1  | 0  | 0  | 1  | 0  | 0  | 1  | 0  | 1  | 18           | ++      |
| 9  | Ibrahim et al. <sup>7</sup>       | 0                                                                                                                      | 1 | 1 | 0 | 1 | 0 | 1 | 1 | 1 | 1  | 1  | 1  | 1  | 0  | 1  | 1  | 1  | 1  | 1  | 0  | 0  | 1  | 1  | 1  | 1  | 0  | 1  | 20           | ++      |
| 10 | Justine et al. <sup>44</sup>      | 1                                                                                                                      | 1 | 1 | 1 | 1 | 0 | 1 | 1 | 1 | 1  | 1  | 1  | 1  | 0  | 1  | 1  | 1  | 0  | 1  | 0  | 0  | 0  | 0  | 1  | 1  | 0  | 1  | 19           | ++      |
| 11 | Martial et al. <sup>21</sup>      | 0                                                                                                                      | 2 | 1 | 2 | 1 | 0 | 1 | 1 | 1 | 1  | 1  | 1  | 1  | 0  | 1  | 1  | 1  | 1  | 1  | 0  | 0  | 1  | 1  | 1  | 1  | 1  | 1  | 24           | +++     |
| 12 | Mave et al. <sup>22</sup>         | 1                                                                                                                      | 1 | 1 | 1 | 1 | 0 | 1 | 1 | 1 | 1  | 1  | 1  | 1  | 0  | 1  | 1  | 1  | 0  | 1  | 0  | 0  | 1  | 0  | 1  | 1  | 0  | 1  | 20           | ++      |
| 13 | McIlleron et al. <sup>4</sup>     | 1                                                                                                                      | 2 | 1 | 1 | 1 | 0 | 1 | 1 | 1 | 1  | 1  | 1  | 1  | 0  | 1  | 1  | 1  | 1  | 1  | 0  | 0  | 1  | 1  | 1  | 1  | 1  | 1  | 24           | +++     |
| 14 | McIlleron et al. <sup>23</sup>    | 1                                                                                                                      | 2 | 1 | 1 | 1 | 0 | 1 | 1 | 1 | 1  | 1  | 1  | 1  | 0  | 1  | 1  | 1  | 0  | 1  | 0  | 0  | 1  | 1  | 1  | 1  | 1  | 1  | 23           | +++     |
| 15 | Mlotha et al. <sup>24</sup>       | 1                                                                                                                      | 1 | 1 | 1 | 1 | 0 | 1 | 1 | 1 | 1  | 1  | 1  | 1  | 0  | 1  | 1  | 1  | 1  | 1  | 0  | 0  | 1  | 1  | 1  | 1  | 1  | 1  | 23           | +++     |
| 16 | Mlotha et al. <sup>45</sup>       | 0                                                                                                                      | 1 | 1 | 1 | 1 | 0 | 1 | 1 | 1 | 1  | 1  | 1  | 1  | 0  | 1  | 1  | 1  | 0  | 1  | 0  | 0  | 0  | 0  | 1  | 1  | 1  | 0  | 18           | ++      |
| 17 | Mukherjee et al. <sup>25</sup>    | 1                                                                                                                      | 2 | 1 | 2 | 1 | 0 | 1 | 1 | 1 | 1  | 1  | 1  | 1  | 1  | 1  | 1  | 1  | 0  | 1  | 0  | 0  | 1  | 1  | 1  | 1  | 1  | 1  | 25           | +++     |
| 18 | Mukherjee et al. <sup>26</sup>    | 1                                                                                                                      | 1 | 1 | 1 | 1 | 0 | 1 | 1 | 1 | 1  | 1  | 1  | 1  | 1  | 1  | 1  | 1  | 0  | 1  | 0  | 0  | 1  | 1  | 1  | 1  | 1  | 1  | 23           | +++     |
| 19 | Pouplin et al. <sup>46</sup>      | 1                                                                                                                      | 1 | 1 | 1 | 1 | 0 | 1 | 1 | 1 | 1  | 1  | 1  | 1  | 0  | 1  | 1  | 1  | 0  | 1  | 0  | 0  | 1  | 1  | 1  | 1  | 0  | 1  | 21           | ++      |
| 20 | Ramachandran et al. <sup>27</sup> | 1                                                                                                                      | 1 | 1 | 2 | 1 | 0 | 1 | 1 | 1 | 1  | 1  | 1  | 1  | 1  | 1  | 1  | 1  | 1  | 1  | 0  | 0  | 1  | 1  | 1  | 1  | 0  | 1  | 24           | +++     |
| 21 | Ramachandran et al. <sup>28</sup> | 1                                                                                                                      | 1 | 1 | 2 | 1 | 0 | 1 | 1 | 1 | 1  | 1  | 1  | 1  | 1  | 1  | 1  | 1  | 1  | 0  | 0  | 0  | 1  | 1  | 1  | 1  | 0  | 1  | 23           | +++     |
| 22 | Rangari et al. <sup>29</sup>      | 1                                                                                                                      | 1 | 1 | 1 | 1 | 0 | 1 | 1 | 1 | 1  | 1  | 1  | 1  | 0  | 1  | 1  | 1  | 1  | 1  | 0  | 0  | 1  | 0  | 1  | 1  | 0  | 1  | 21           | ++      |
| 23 | Ranjalkar et al. <sup>30</sup>    | 1                                                                                                                      | 1 | 1 | 1 | 1 | 0 | 1 | 1 | 1 | 1  | 1  | 1  | 1  | 0  | 1  | 1  | 1  | 1  | 1  | 0  | 0  | 1  | 1  | 1  | 1  | 1  | 1  | 23           | +++     |
| 24 | Roy et al. <sup>31</sup>          | 0                                                                                                                      | 1 | 1 | 0 | 1 | 0 | 1 | 1 | 1 | 1  | 1  | 0  | 0  | 0  | 1  | 1  | 1  | 1  | 1  | 0  | 0  | 1  | 0  | 1  | 0  | 0  | 1  | 16           | ++      |
| 25 | Roy et al. <sup>32</sup>          | 0                                                                                                                      | 1 | 1 | 0 | 1 | 0 | 1 | 1 | 1 | 1  | 1  | 0  | 0  | 0  | 1  | 1  | 1  | 1  | 1  | 0  | 0  | 1  | 0  | 1  | 0  | 0  | 1  | 16           | ++      |
| 26 | Roy et al. <sup>33</sup>          | 0                                                                                                                      | 1 | 1 | 0 | 1 | 0 | 1 | 1 | 1 | 1  | 1  | 0  | 0  | 0  | 1  | 1  | 1  | 1  | 1  | 0  | 0  | 1  | 0  | 1  | 0  | 0  | 1  | 16           | ++      |
| 27 | Roy et al. <sup>34</sup>          | 0                                                                                                                      | 1 | 1 | 0 | 1 | 0 | 1 | 1 | 1 | 1  | 1  | 1  | 0  | 0  | 1  | 1  | 1  | 1  | 1  | 0  | 0  | 1  | 0  | 1  | 0  | 0  | 1  | 17           | ++      |
| 28 | Ruslami et al. <sup>35</sup>      | 1                                                                                                                      | 2 | 1 | 1 | 1 | 0 | 1 | 1 | 1 | 1  | 1  | 1  | 1  | 1  | 1  | 1  | 1  | 1  | 1  | 0  | 0  | 1  | 1  | 1  | 1  | 0  | 1  | 24           | +++     |
| 29 | Schaaf et al. <sup>3</sup>        | 1                                                                                                                      | 1 | 1 | 1 | 1 | 0 | 1 | 1 | 1 | 1  | 1  | 1  | 1  | 1  | 1  | 1  | 1  | 1  | 0  | 0  | 0  | 1  | 1  | 1  | 1  | 0  | 1  | 22           | ++      |
| 30 | Schaaf et al. <sup>36</sup>       | 1                                                                                                                      | 1 | 1 | 1 | 1 | 0 | 1 | 1 | 1 | 1  | 1  | 1  | 1  | 1  | 1  | 1  | 1  | 1  | 1  | 0  | 0  | 1  | 1  | 1  | 1  | 1  | 1  | 24           | +++     |
| 31 | Schipani et al. <sup>47</sup>     | 1                                                                                                                      | 1 | 1 | 1 | 1 | 0 | 1 | 1 | 1 | 1  | 1  | 1  | 1  | 1  | 1  | 1  | 1  | 1  | 1  | 1  | 1  | 1  | 1  | 1  | 0  | 0  | 1  | 24           | +++     |
| 32 | Shah et al. <sup>37</sup>         | 1                                                                                                                      | 1 | 1 | 1 | 1 | 0 | 1 | 1 | 1 | 1  | 1  | 1  | 1  | 0  | 1  | 1  | 1  | 1  | 1  | 0  | 0  | 1  | 1  | 1  | 1  | 1  | 1  | 23           | +++     |
| 33 | Shah et al. <sup>38</sup>         | 1                                                                                                                      | 1 | 1 | 1 | 1 | 0 | 1 | 1 | 1 | 1  | 1  | 1  | 1  | 1  | 1  | 1  | 1  | 1  | 1  | 0  | 0  | 1  | 1  | 1  | 1  | 1  | 1  | 24           | +++     |
| 34 | Thee et al. <sup>5</sup>          | 1                                                                                                                      | 1 | 1 | 2 | 1 | 0 | 1 | 1 | 1 | 1  | 1  | 1  | 1  | 1  | 1  | 1  | 1  | 1  | 1  | 0  | 0  | 1  | 1  | 1  | 1  | 0  | 1  | 24           | +++     |
| 35 | Van Aartsen et al. <sup>14</sup>  | 1                                                                                                                      | 2 | 1 | 2 | 1 | 2 | 1 | 1 | 1 | 1  | 1  | 1  | 1  | 1  | 1  | 1  | 1  | 1  | 1  | 0  | 0  | 1  | 1  | 1  | 1  | 0  | 1  | 27           | +++     |
| 36 | Verhagen et al. <sup>6</sup>      | 1                                                                                                                      | 2 | 1 | 2 | 1 | 0 | 1 | 1 | 1 | 1  | 1  | 1  | 1  | 1  | 1  | 1  | 1  | 1  | 1  | 0  | 0  | 1  | 1  | 1  | 1  | 0  | 1  | 25           | +++     |
| 37 | Tikiso et al. <sup>41</sup>       | 1                                                                                                                      | 2 | 1 | 2 | 1 | 1 | 1 | 1 | 1 | 1  | 1  | 1  | 1  | 1  | 1  | 1  | 1  | 1  | 1  | 1  | 1  | 1  | 1  | 1  | 1  | 1  | 1  | 29           | +++     |
| 38 | Zhu et al. <sup>39</sup>          | 1                                                                                                                      | 1 | 1 | 1 | 1 | 0 | 1 | 1 | 1 | 1  | 1  | 1  | 1  | 0  | 1  | 1  | 1  | 1  | 1  | 1  | 0  | 1  | 1  | 1  | 1  | 1  | 1  | 24           | +++     |
| 39 | Zhu et al. <sup>40</sup>          | 1                                                                                                                      | 1 | 1 | 1 | 1 | 0 | 1 | 1 | 1 | 1  | 1  | 1  | 1  | 0  | 1  | 1  | 1  | 1  | 1  | 1  | 0  | 1  | 1  | 1  | 1  | 1  | 1  | 24           | +++     |

+++; high quality (total points: 23-33); ++; moderate quality (total points: 12-22); +; low quality (total points: ≤11).

**Table E4. Eligible studies for which individual patient data were not provided, and reasons for exclusion.**

| No | Authors                      | Year of publication | Year of data collection | Country      | N patients included | INH | RIF | PZA | EMB | Reasons for exclusion                                                                        | Quality |
|----|------------------------------|---------------------|-------------------------|--------------|---------------------|-----|-----|-----|-----|----------------------------------------------------------------------------------------------|---------|
| 1  | Arya et al. <sup>51</sup>    | 2008                | 1991-1993               | India        | 40                  | No  | No  | Yes | No  | Authors no longer had data access.                                                           | ++      |
| 2  | Arya et al. <sup>52</sup>    | 2009                | 1990s                   | India        | 18                  | No  | No  | Yes | No  | Authors no longer had data access.                                                           | ++      |
| 3  | Seth et al. <sup>53</sup>    | 1993                | 1990s                   | India        | 94                  | Yes | Yes | No  | No  | Principal investigator (V. Seth) had passed away; other authors did not have data access.    | ++      |
| 4  | Seth et al. <sup>54</sup>    | 1994                | 1990s                   | India        | 20                  | Yes | No  | No  | No  | Principal investigator (V. Seth) had passed away; other authors did not have data access.    | ++      |
| 5  | Donald et al. <sup>55</sup>  | 1994                | 1990s                   | South Africa | 32                  | Yes | No  | No  | No  | Authors no longer had data access.                                                           | ++      |
| 6  | Donald et al. <sup>48</sup>  | 1992                | 1990s                   | South Africa | 38                  | Yes | No  | No  | No  | Authors no longer had data access.                                                           | ++      |
| 7  | Hiruy et al. <sup>50</sup>   | 2015                | 2012-2013               | South Africa | 31                  | Yes | Yes | Yes | Yes | Authors agreed to share the data, but data never sent.                                       | +++     |
| 8  | Mahajan et al. <sup>56</sup> | 1997                | 1990s                   | India        | 20                  | No  | Yes | No  | No  | Recent contact details of the investigators were unavailable.                                | +       |
| 9  | Minchev et al. <sup>57</sup> | 2005                | unknown                 | Bulgaria     | 12                  | No  | Yes | No  | No  | Recent contact details of the investigators were unavailable.                                | +       |
| 10 | Rey et al. <sup>58</sup>     | 2001                | unknown                 | France       | 34                  | Yes | No  | No  | No  | No response from the corresponding author; other co-authors did not have data access.        | ++      |
| 11 | Rey et al. <sup>49</sup>     | 1998                | 1990-1993               | France       | 61                  | Yes | No  | No  | No  | No response from the corresponding author; other co-authors did not have data access.        | ++      |
| 12 | Seifart et al. <sup>16</sup> | 1995                | 1990s                   | South Africa | 13                  | Yes | No  | No  | No  | Authors no longer had data access.                                                           | ++      |
| 13 | Thee et al. <sup>59</sup>    | 2010                | 1960s                   | Germany      | 45                  | Yes | No  | No  | No  | Principal investigator (K. Magdorf) had passed away; other authors did not have data access. | ++      |
| 14 | Thee et al. <sup>60</sup>    | 2009                | 1973                    | Germany      | 27                  | No  | Yes | No  | No  | Principal investigator (K. Magdorf) had passed away; other authors did not have data access. | ++      |
| 15 | Thee et al. <sup>61</sup>    | 2008                | 1983                    | Germany      | 21                  | No  | No  | Yes | No  | Principal investigator (K. Magdorf) had passed away; other authors did not have data access. | ++      |
| 16 | Thee et al. <sup>62</sup>    | 2007                | 1971-1973               | Germany      | 48                  | No  | No  | No  | Yes | Principal investigator (K. Magdorf) had passed away; other authors did not have data access. | ++      |

INH: isoniazid; RIF: rifampicin, PZA: pyrazinamide; EMB: ethambutol; N: number; +++: high quality (total points: 23-33); ++: moderate quality (total points: 12-22); +: low quality (total points: ≤11).

**Table E5. Details of the observations for which AUC<sub>0-24</sub> and C<sub>max</sub> could not be assessed due to the limited number of samples available, or due to other reasons (e.g., all/most data were below the lower limit of quantification, and/or drug product of poor quality<sup>¶</sup>).**

| AUC <sub>0-24</sub>                                            |                         | C <sub>max</sub>                   |                         |
|----------------------------------------------------------------|-------------------------|------------------------------------|-------------------------|
| First author, year                                             | No. of observations (%) | First author, year                 | No. of observations (%) |
| <b>Total, n (isoniazid)</b>                                    | <b>341</b>              | <b>Total, n (isoniazid)</b>        | <b>301</b>              |
| Pouplin.1 (2016) <sup>46</sup>                                 | 99 (29.0%)              | Pouplin.1 (2016) <sup>46</sup>     | 99 (32.9%)              |
| Pouplin.2 (2016) <sup>46</sup>                                 | 99 (29.3%)              | Pouplin.2 (2016) <sup>46</sup>     | 99 (32.9%)              |
| Justine (2020) <sup>44</sup>                                   | 51 (15.0%)              | Justine (2020) <sup>44</sup>       | 51 (16.9%)              |
| Mlotha (unpublished) <sup>45</sup>                             | 47 (13.8 %)             | Mlotha (unpublished) <sup>45</sup> | 47 (15.6%)              |
| Mukherjee (2015) <sup>25</sup>                                 | 22 (6.4%)               | Ramachandran (2015) <sup>28</sup>  | 2 (0.7%)                |
| Martial (2018) <sup>21</sup>                                   | 5 (1.5%)                | Mave (2017) <sup>22</sup>          | 1 (0.3%)                |
| Van Aartsen (2022) <sup>14</sup>                               | 4 (1.2%)                | Shah (2019) <sup>37</sup>          | 1 (0.3%)                |
| Denti (2022) <sup>8</sup>                                      | 3 (0.9%)                | Denti (2022) <sup>8</sup>          | 1 (0.3%)                |
| Mave (2017) <sup>22</sup>                                      | 2 (0.6%)                |                                    |                         |
| Mlotha (2015) <sup>24</sup>                                    | 2 (0.6%)                |                                    |                         |
| Ramachandran (2015) <sup>28</sup>                              | 2 (0.6%)                |                                    |                         |
| Mukherjee (2016) <sup>26</sup>                                 | 2 (0.6%)                |                                    |                         |
| Dayal (2018); <sup>17</sup> Shah (2019); <sup>37</sup> and     | 3 (0.9%)                |                                    |                         |
| Ranjalkar (2018); <sup>30</sup> 1 each                         |                         |                                    |                         |
| <b>Total, n (rifampicin)</b>                                   | <b>429</b>              | <b>Total, n (rifampicin)</b>       | <b>365</b>              |
| Pouplin.1 (2016) <sup>46</sup>                                 | 99 (23.1%)              | Pouplin.1 (2016) <sup>46</sup>     | 99 (27.1%)              |
| Pouplin.2 (2016) <sup>46</sup>                                 | 99 (23.1%)              | Pouplin.2 (2016) <sup>46</sup>     | 99 (27.1%)              |
| Justine (2020) <sup>44</sup>                                   | 51 (11.9%)              | Justine (2020) <sup>44</sup>       | 51 (14.0%)              |
| Schipani (2015) <sup>47</sup>                                  | 47 (10.9%)              | Mlotha (unpublished) <sup>45</sup> | 47 (12.9%)              |
| Mukherjee (2015) <sup>25</sup>                                 | 21 (4.9%)               | Denti.2 (2022) <sup>8</sup>        | 60 (16.4%) <sup>¶</sup> |
| Mlotha (2015) <sup>24</sup>                                    | 10 (2.3%)               | Ramachandran (2015) <sup>28</sup>  | 6 (1.6%)                |
| Denti.2 (2022) <sup>8</sup>                                    | 60 (14.0%) <sup>¶</sup> | Van Aartsen (2022) <sup>14</sup>   | 1 (0.3%)                |
| Van Aartsen (2022) <sup>14</sup>                               | 9 (2.1%)                | Mlotha (2015) <sup>24</sup>        | 1 (0.3%)                |
| Ramachandran (2015) <sup>28</sup>                              | 7 (1.6%)                | Garcia-Prats (2021) <sup>18</sup>  | 1 (0.3%)                |
| Garcia-Prats (2021) <sup>18</sup>                              | 5 (1.1%)                | Denti.1 (2022) <sup>8</sup>        | 1 (0.3%)                |
| Ranjalkar (2018) <sup>30</sup>                                 | 4 (0.9%)                |                                    |                         |
| Mukherjee (2016) <sup>26</sup>                                 | 4 (0.9%)                |                                    |                         |
| Schaaf.2 (2009) <sup>36</sup>                                  | 4 (0.9%)                |                                    |                         |
| Ramachandran (2013) <sup>27</sup>                              | 2 (0.5%)                |                                    |                         |
| Verhagen (2012) <sup>6</sup>                                   | 2 (0.5%)                |                                    |                         |
| Martial (2018); <sup>21</sup> Ruslami.1 (2022); <sup>35</sup>  | 3 (0.6%)                |                                    |                         |
| and Schaaf.1 (2009); <sup>36</sup> 1 each                      |                         |                                    |                         |
| <b>Total, n (pyrazinamide)</b>                                 | <b>342</b>              | <b>Total, n (pyrazinamide)</b>     | <b>283</b>              |
| Pouplin.1 (2016) <sup>46</sup>                                 | 99 (28.9%)              | Pouplin.1 (2016) <sup>46</sup>     | 99 (35.0%)              |
| Pouplin.2 (2016) <sup>46</sup>                                 | 99 (28.9%)              | Pouplin.2 (2016) <sup>46</sup>     | 99 (35.0%)              |
| Justine (2020) <sup>44</sup>                                   | 28 (8.2%)               | Justine (2020) <sup>44</sup>       | 28 (9.9%)               |
| Mlotha (unpublished) <sup>45</sup>                             | 44 (12.9%)              | Mlotha (unpublished) <sup>45</sup> | 44 (15.5%)              |
| Mukherjee (2015) <sup>25</sup>                                 | 28 (8.2%)               | Van Aartsen (2022) <sup>14</sup>   | 4 (1.4%)                |
| Zhu (2002) <sup>39</sup>                                       | 11 (3.2%)               | Antwi (2017) <sup>13</sup>         | 3 (1.1%)                |
| Van Aartsen (2022) <sup>14</sup>                               | 7 (2.0%)                | Zhu (2002) <sup>39</sup>           | 3 (1.1%)                |
| Martial (2018) <sup>21</sup>                                   | 5 (1.5%)                | Martial (2018) <sup>21</sup>       | 2 (0.7%)                |
| Graham (2006) <sup>19</sup>                                    | 4 (1.2%)                | Denti (2022) <sup>8</sup>          | 1 (0.3%)                |
| Denti (2022) <sup>8</sup>                                      | 3 (0.9%)                |                                    |                         |
| Antwi (2017) <sup>13</sup>                                     | 3 (0.9%)                |                                    |                         |
| Ramachandran (2013) <sup>27</sup>                              | 2 (0.6%)                |                                    |                         |
| Verhagen (2012) <sup>6</sup>                                   | 2 (0.6%)                |                                    |                         |
| McIlleron.2 (2011) <sup>23</sup>                               | 2 (0.6%)                |                                    |                         |
| Mlotha (2015) <sup>24</sup>                                    | 2 (0.6%)                |                                    |                         |
| Mukherjee (2016); <sup>26</sup> McIlleron.1                    | 3 (0.9%)                |                                    |                         |
| (2011); <sup>23</sup> and Chabala (2022); <sup>43</sup> 1 each |                         |                                    |                         |
| <b>Total, n (ethambutol)</b>                                   | <b>157</b>              | <b>Total, n (ethambutol)</b>       | <b>84</b>               |
| Mlotha (unpublished) <sup>45</sup>                             | 47 (29.9%)              | Mlotha (unpublished) <sup>45</sup> | 47 (55.9%)              |
| Justine (2020) <sup>44</sup>                                   | 24 (15.3%)              | Justine (2020) <sup>44</sup>       | 24 (28.6%)              |
| Mukherjee (2015) <sup>25</sup>                                 | 39 (24.8%)              | Zhu (2004) <sup>40</sup>           | 5 (5.9%)                |
| Van Aartsen (2022) <sup>14</sup>                               | 17 (10.8%)              | Antwi (2017) <sup>13</sup>         | 3 (3.6%)                |
| Zhu (2004) <sup>40</sup>                                       | 11 (7.0%)               | Martial (2018) <sup>21</sup>       | 3 (3.6%)                |
| Mukherjee (2016) <sup>26</sup>                                 | 8 (5.1%)                | Mukherjee (2016) <sup>26</sup>     | 1 (1.2%)                |
| Martial (2018) <sup>21</sup>                                   | 6 (3.8%)                | Tikiso (2022) <sup>41</sup>        | 1 (1.2%)                |
| Antwi (2017) <sup>13</sup>                                     | 3 (1.9%)                |                                    |                         |
| Graham (2016) <sup>19</sup>                                    | 1 (0.6%)                |                                    |                         |
| Tikiso (2022) <sup>41</sup>                                    | 1 (0.6%)                |                                    |                         |

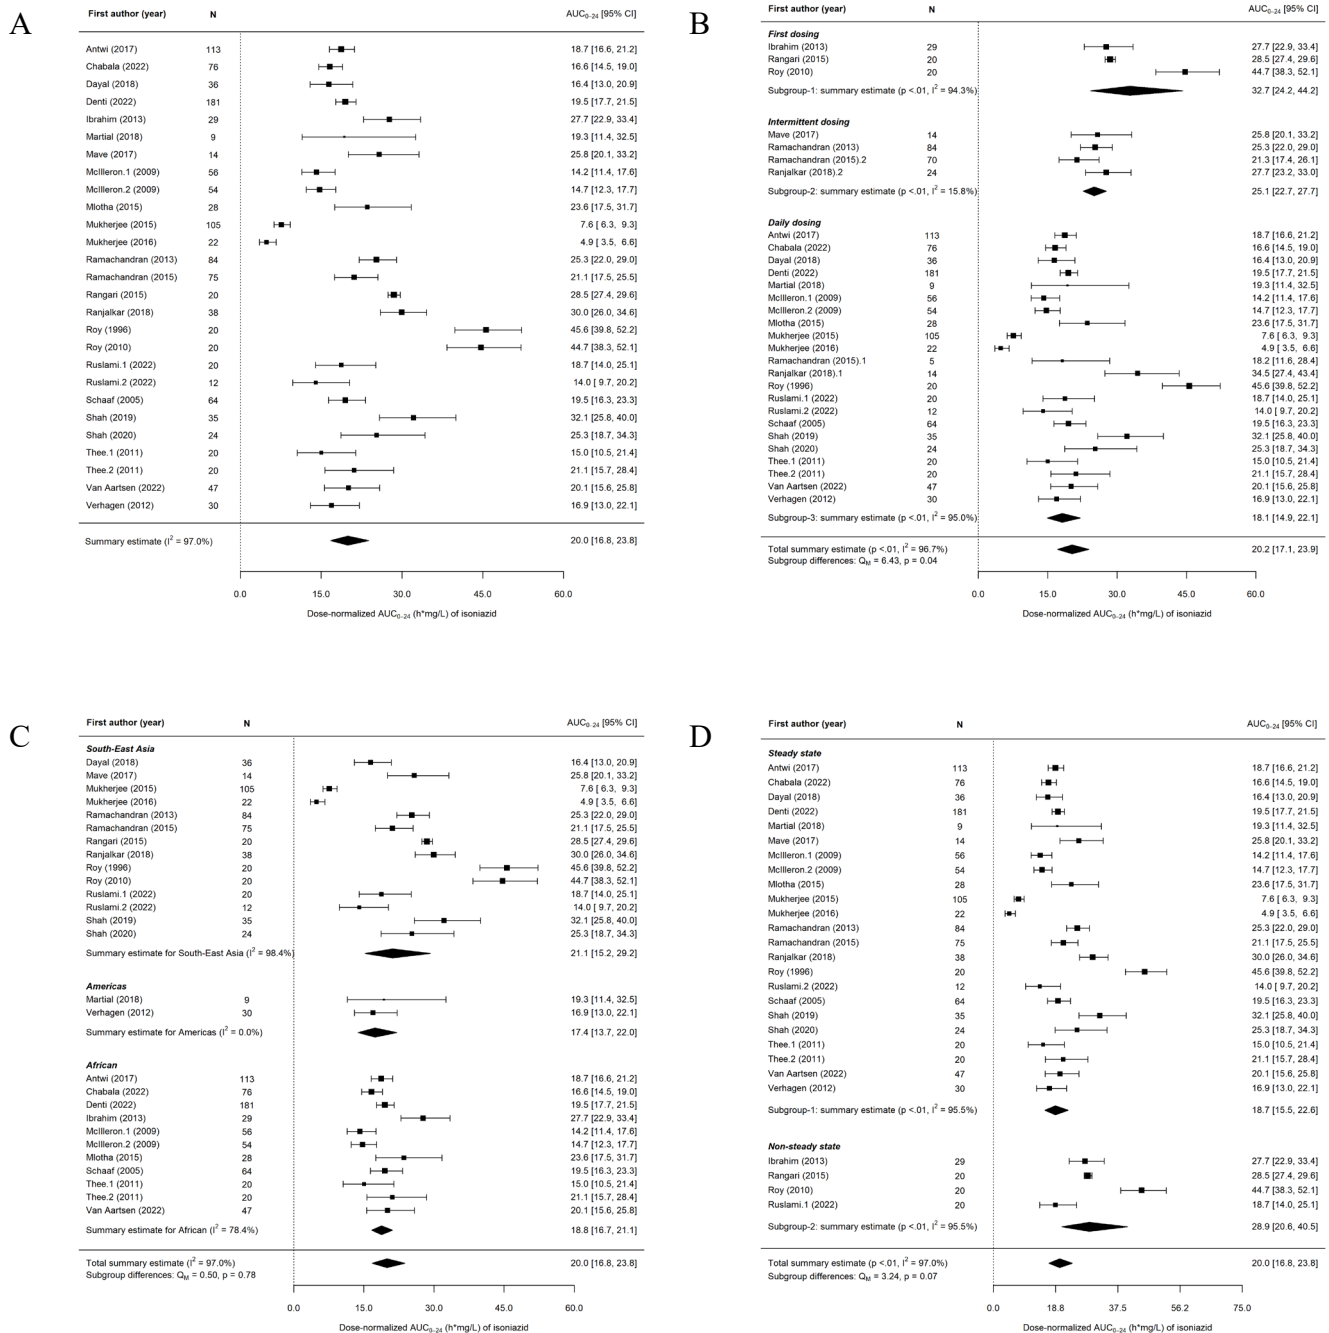

**Figure E1. Forest plots for summary estimates (geometric means [95% CIs]) of dose-normalized AUC<sub>0-24</sub> for isoniazid in all children and adolescents with tuberculosis (A), stratified by dosing intervals (B), World Health Organization Regions (C), and pharmacokinetic sampling schedules (D).**

AUC<sub>0-24</sub>: area under the concentration-time curve from 0 to 24 hours post-dose;  $I^2$ : the percentage of variation across studies that is due to heterogeneity,  $Q_M$ : the omnibus test of all model coefficients. AUC<sub>0-24</sub> values were dose-normalized for isoniazid at 10 mg/kg, rifampicin at 15 mg/kg, pyrazinamide at 35 mg/kg, and ethambutol at 20 mg/kg

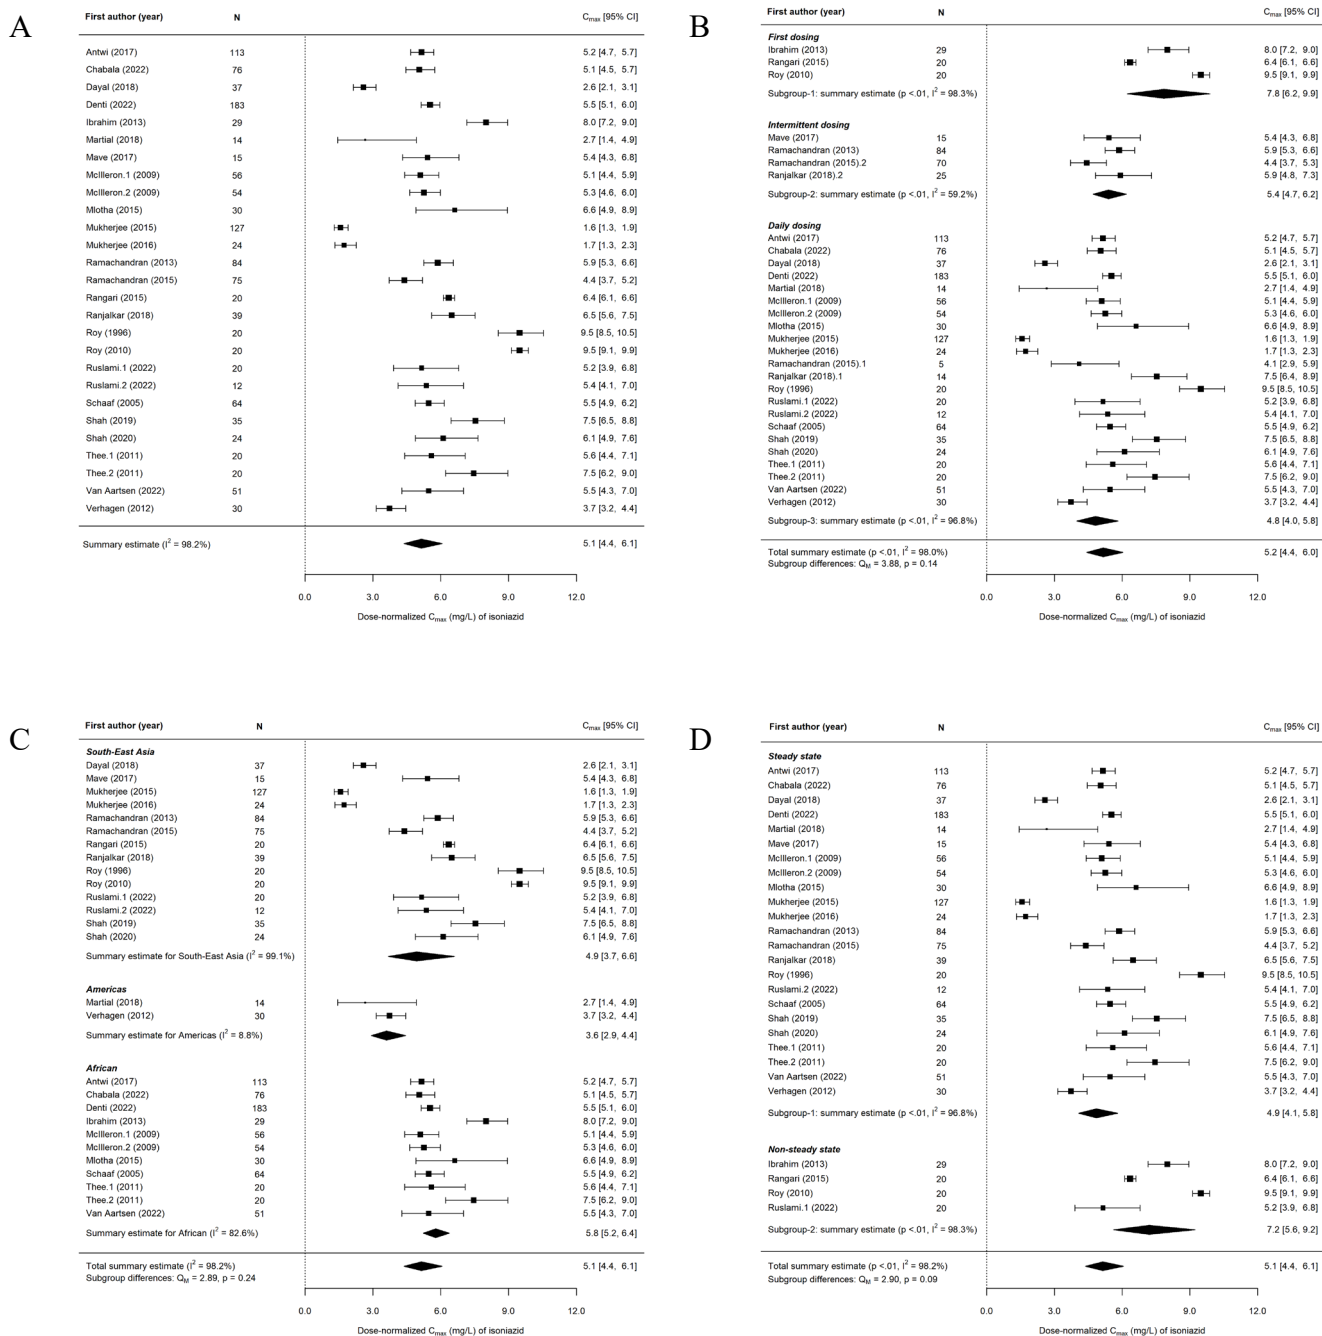

**Figure E2. Forest plots for summary estimates (geometric means [95% CIs]) of dose-normalized  $C_{max}$  for isoniazid in all children and adolescents with tuberculosis (A), stratified by dosing intervals (B), World Health Organization Regions (C), and pharmacokinetic sampling schedules (D).**

$C_{max}$ : peak plasma concentration;  $I^2$ : the percentage of variation across studies that is due to heterogeneity,  $Q_M$ : the omnibus test of all model coefficients.  $C_{max}$  values were dose-normalized for isoniazid at 10 mg/kg, rifampicin at 15 mg/kg, pyrazinamide at 35 mg/kg, and ethambutol at 20 mg/kg.

**Table E6. Multivariate linear mixed-effects analyses on the effect of NAT2 acetylator genotypes on log-transformed AUC<sub>0-24</sub> and C<sub>max</sub> values for isoniazid in children and adolescents with tuberculosis, adjusted for age, sex, nutritional status and HIV status.**

|                                                  | Fixed-effects coefficient (95% CI) |                                 |
|--------------------------------------------------|------------------------------------|---------------------------------|
|                                                  | Isoniazid AUC <sub>0-24</sub>      | Isoniazid C <sub>max</sub>      |
| (Intercept)                                      | 2.88 (2.65–3.10)***                | 1.66 (1.44–1.87)***             |
| Dose, mg/kg <sup>†</sup>                         | 0.46 (0.35–0.56)***                | 0.41 (0.29–0.53)***             |
| Age                                              |                                    |                                 |
| <2 years                                         | -0.32 (-0.45–-0.18)***             | -0.30 (-0.42–-0.18)***          |
| 2-4 years                                        | -0.12 (-0.24–-0.001)*              | -0.10 (-0.20–0.01) <sup>#</sup> |
| 5-9 years                                        | -0.06 (-0.16–0.05)                 | -0.05 (-0.14–0.05)              |
| 10-14 years                                      | Ref.                               | Ref.                            |
| 15-18 years                                      | 0.01 (-0.31–0.32)                  | -0.08 (-0.37–0.20)              |
| Sex                                              |                                    |                                 |
| Female                                           | Ref.                               | Ref.                            |
| Male                                             | -0.08 (-0.15–-0.004)*              | -0.05 (-0.12–0.01)              |
| Malnourished <sup>§§</sup>                       |                                    |                                 |
| No                                               | Ref.                               | Ref.                            |
| Yes, moderate                                    | -0.04 (-0.14–0.06)                 | -0.01 (-0.10–0.08)              |
| Yes, severe                                      | -0.07 (-0.17–0.03)                 | -0.05 (-0.14–0.04)              |
| Unknown                                          | 0.26 (-0.04–0.55)                  | 0.21 (-0.06–0.49)               |
| HIV status                                       |                                    |                                 |
| Negative                                         | Ref.                               | Ref.                            |
| Positive                                         | -0.18 (-0.30–-0.06)**              | -0.15 (-0.26–-0.04)**           |
| Unknown                                          | 0.001 (-0.26–0.27)                 | 0.03 (-0.21–0.28)               |
| Acetylator status, NAT2 genotyping <sup>¶¶</sup> |                                    |                                 |
| Slow                                             | 0.71 (0.58–0.83)***                | 0.32 (0.21–0.43)***             |
| Intermediate                                     | Ref.                               | Ref.                            |
| Rapid                                            | -0.30 (-0.46–-0.15)***             | -0.12 (-0.27–0.02) <sup>#</sup> |
| Unknown                                          | -0.07 (-0.25–0.11)                 | -0.28 (-0.45–-0.10)**           |
| Random effects                                   |                                    |                                 |
| $\sigma^2$                                       | 0.42 (0.65) <sup>§</sup>           | 0.36 (0.60) <sup>§</sup>        |
| $\tau_{00}$ studies                              | 0.15 (0.38) <sup>§</sup>           | 0.13 (0.36) <sup>§</sup>        |
| $\tau_{11}$ studies*doses                        | 0.04 (0.19) <sup>§</sup>           | 0.06 (0.24) <sup>§</sup>        |
| $\rho_{01}$ studies                              | -0.63                              | -0.40                           |
| ICC                                              | 0.28                               | 0.32                            |
| N studies                                        | 27                                 | 27                              |
| Observations                                     | 1252                               | 1292                            |
| Conditional R <sup>2</sup>                       | 0.494                              | 0.494                           |

Data are presented as fixed-effects coefficients (beta coefficients) and 95% confidence intervals (CI), unless stated otherwise: <sup>§</sup>mean and standard deviation. AUC<sub>0-24</sub>: area under the plasma concentration-time curve from 0 to 24 hours after dosing; C<sub>max</sub>: peak plasma concentration; HIV: human immunodeficiency virus;  $\sigma^2$ : residual variance,  $\tau_{00}$ : random intercept variance,  $\tau_{11}$ : random slope variance,  $\rho_{01}$ : random slope-intercept correlation, ICC: intraclass correlation coefficient, N: number of included studies, conditional R<sup>2</sup>: the proportion of variance explained by both the fixed and random effects. <sup>†</sup>Drug dose was mean-centred by subtracting the mean from each data point, then standardized by dividing each point by the standard deviation. <sup>§§</sup>Moderate malnutrition was defined as a weigh-for-age or height-for-age Z-score  $\geq -3$  but  $< -2$  in children aged  $< 5$  years, and a height-for-age or body mass index-for-age Z-score  $\geq -3$  but  $< -2$  in children aged  $\geq 5$  years; and severe malnutrition was defined as a weigh-for-age or height-for-age Z-score  $< -3$  in children aged  $< 5$  years, and a height-for-age or body mass index-for-age Z-score  $< -3$  in children aged  $\geq 5$  years. <sup>¶¶</sup>Details are described in Appendix 4. \*\*\*p<0.001, \*\*p<0.01, \*p<0.05, #p<0.1.

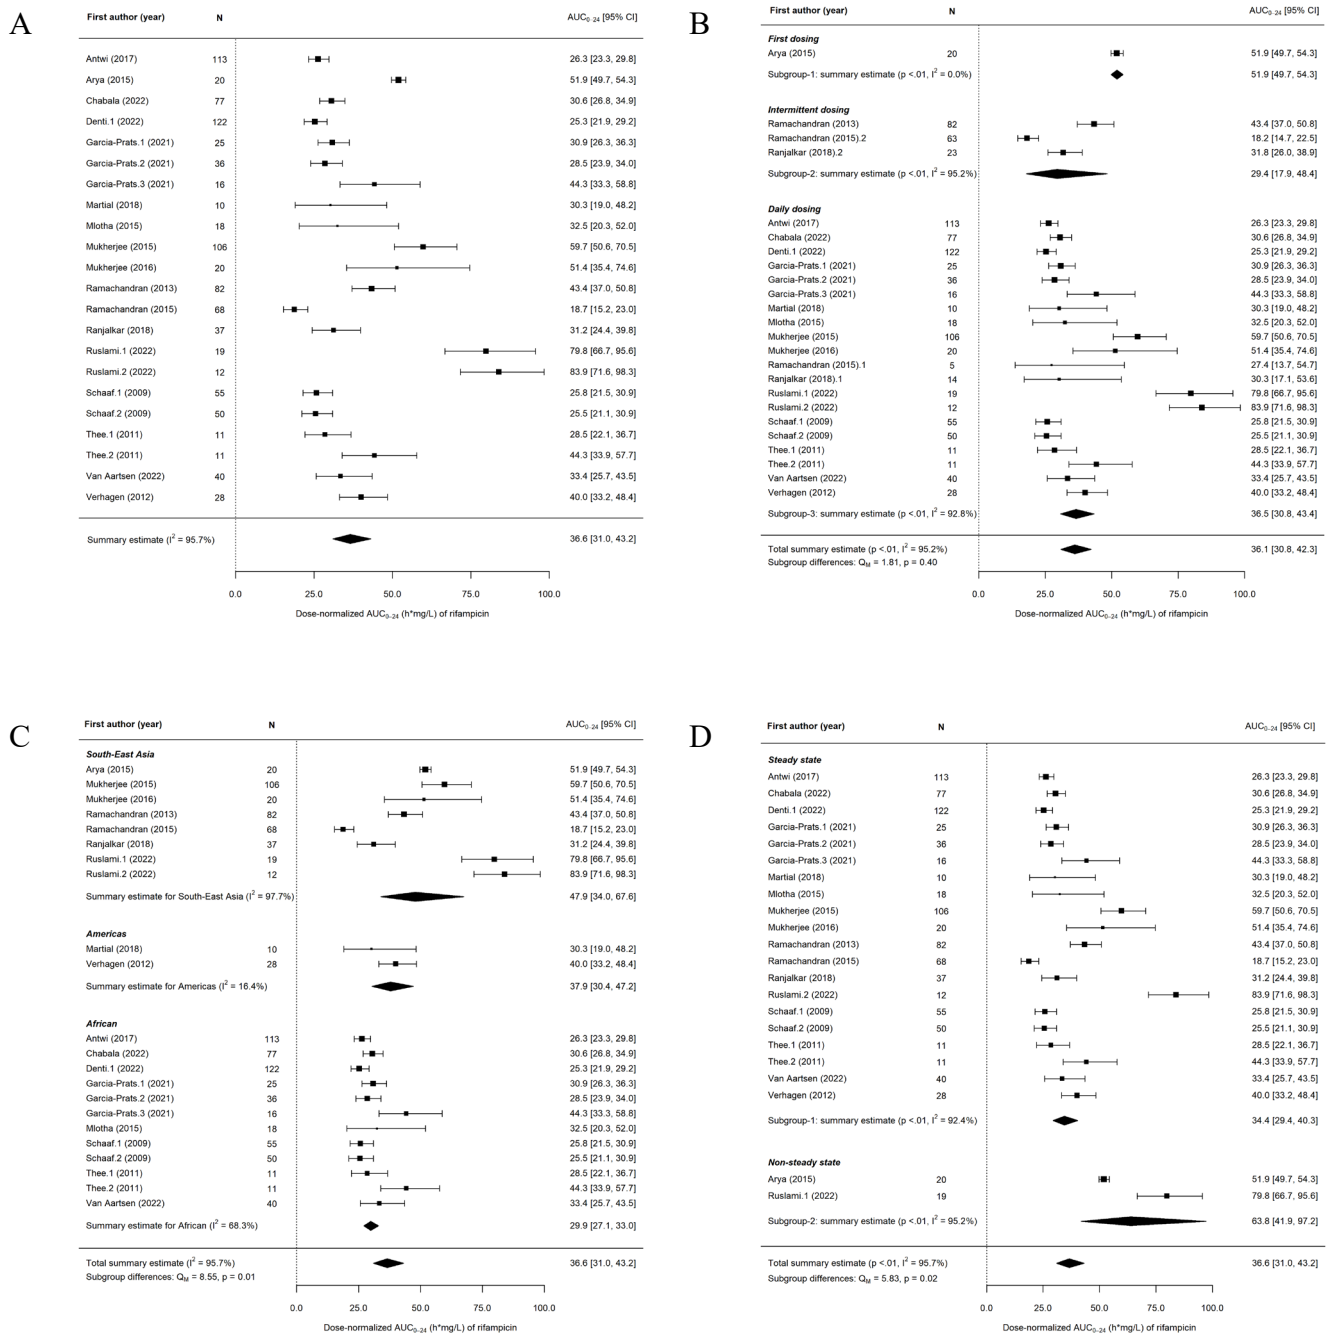

**Figure E3. Forest plots for summary estimates (geometric means [95% CIs]) of dose-normalized AUC<sub>0-24</sub> for rifampicin in all children and adolescents with tuberculosis (A), stratified by dosing intervals (B), World Health Organization Regions (C), and pharmacokinetic sampling schedules (D).**

AUC<sub>0-24</sub>: area under the concentration-time curve from 0 to 24 hours post-dose;  $I^2$ : the percentage of variation across studies that is due to heterogeneity,  $Q_M$ : the omnibus test of all model coefficients. AUC<sub>0-24</sub> values were dose-normalized for isoniazid at 10 mg/kg, rifampicin at 15 mg/kg, pyrazinamide at 35 mg/kg, and ethambutol at 20 mg/kg.

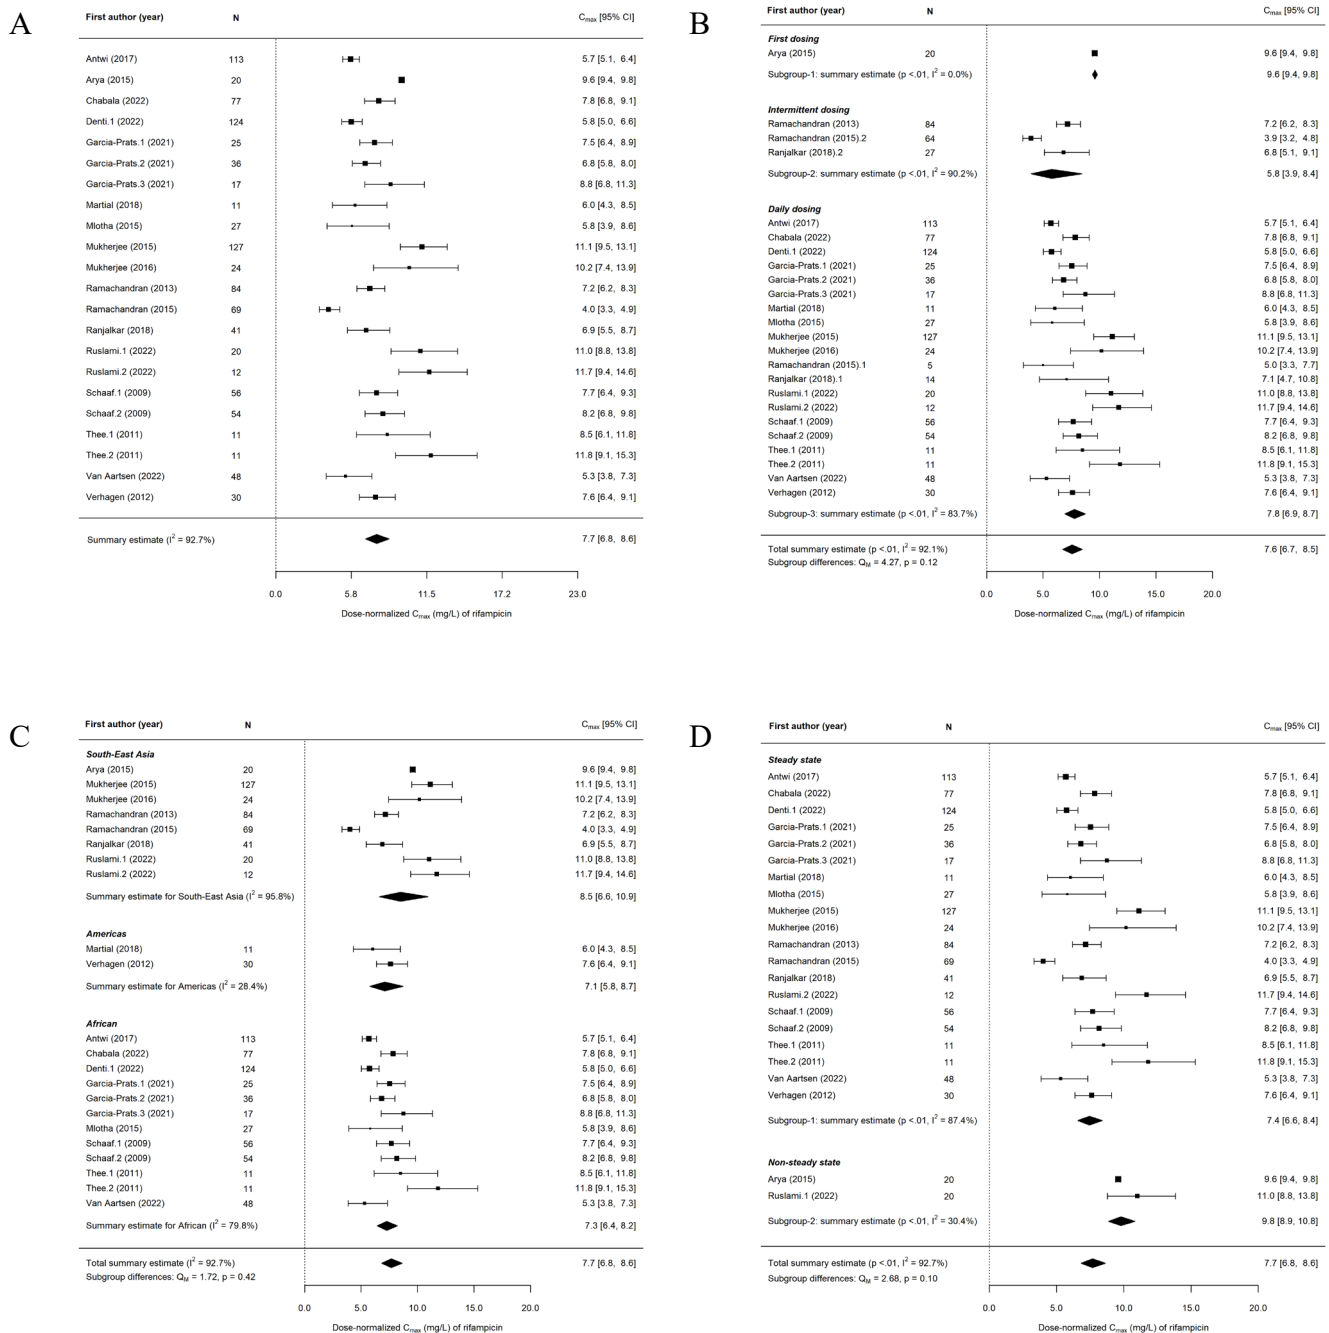

**Figure E4. Forest plots for summary estimates (geometric means [95% CIs]) of dose-normalized  $C_{max}$  for rifampicin in all children and adolescents with tuberculosis (A), stratified by dosing intervals (B), World Health Organization Regions (C), and pharmacokinetic sampling schedules (D).**

$C_{max}$ : peak plasma concentration;  $I^2$ : the percentage of variation across studies that is due to heterogeneity,  $Q_M$ : the omnibus test of all model coefficients.  $C_{max}$  values were dose-normalized for isoniazid at 10 mg/kg, rifampicin at 15 mg/kg, pyrazinamide at 35 mg/kg, and ethambutol at 20 mg/kg.

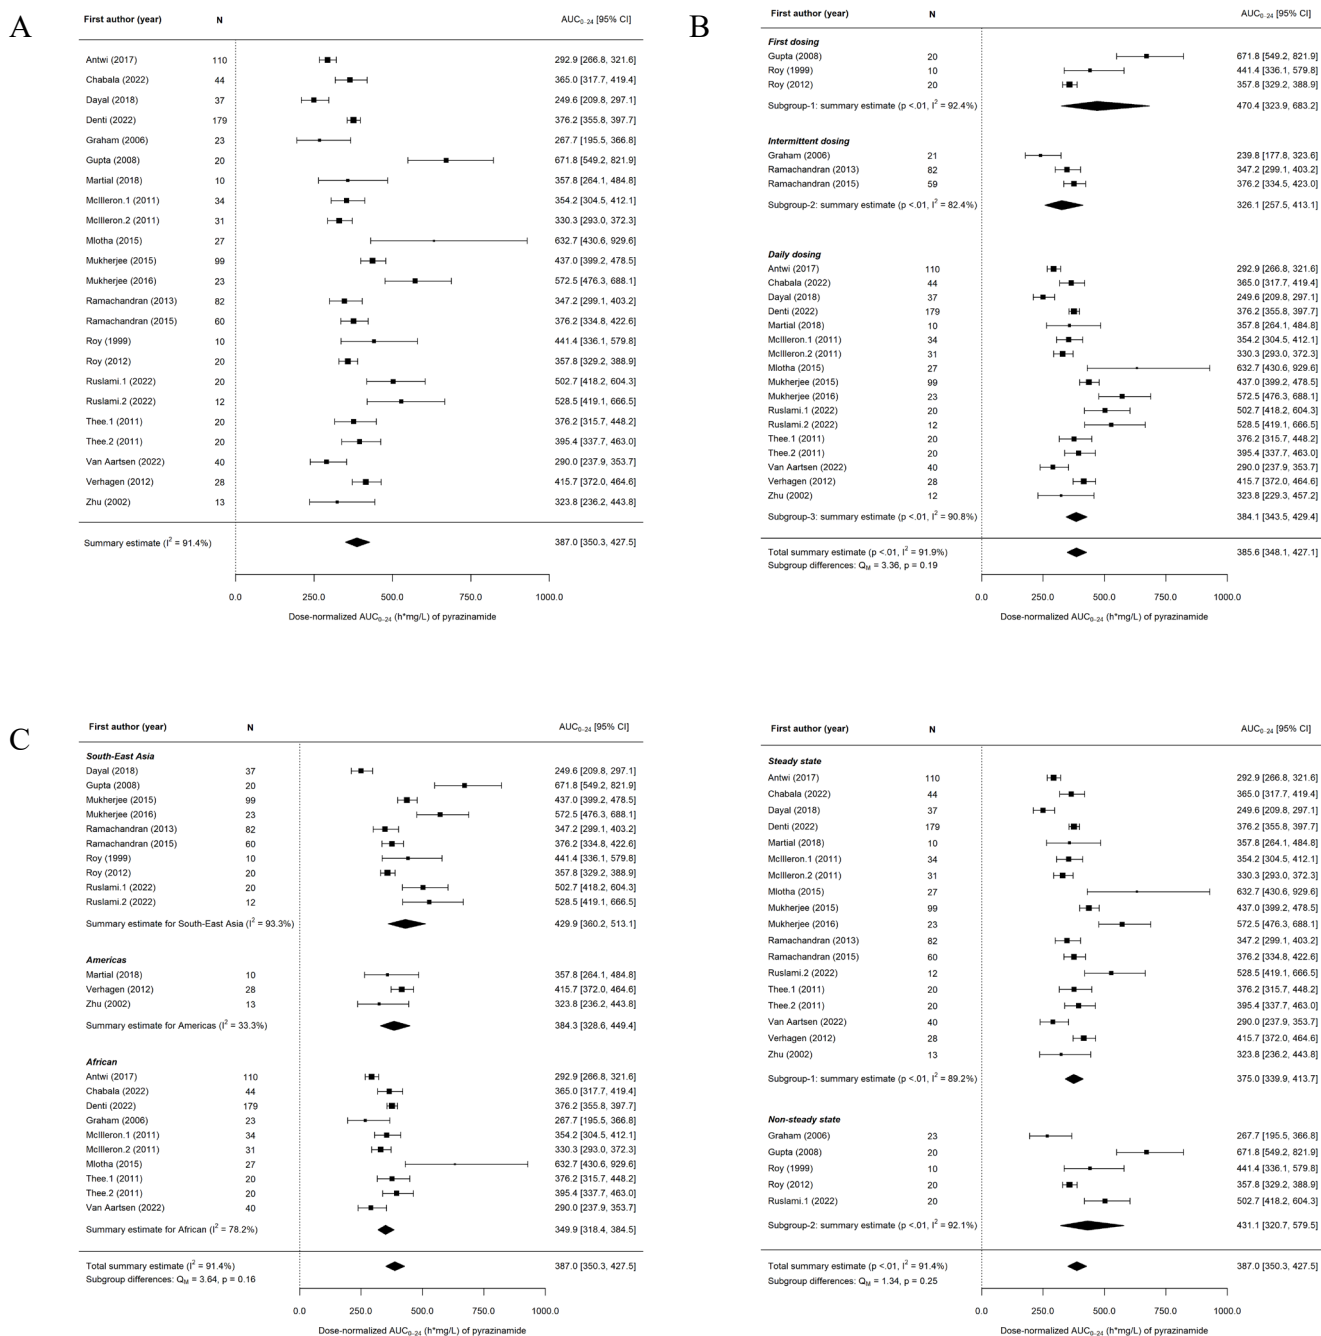

**Figure E5. Forest plots for summary estimates (geometric means [95% CIs]) of dose-normalized AUC<sub>0-24</sub> for pyrazinamide in all children and adolescents with tuberculosis (A), stratified by dosing intervals (B), World Health Organization Regions (C), and pharmacokinetic sampling schedules (D).**

AUC<sub>0-24</sub>: area under the concentration-time curve from 0 to 24 hours post-dose;  $I^2$ : the percentage of variation across studies that is due to heterogeneity,  $Q_M$ : the omnibus test of all model coefficients. AUC<sub>0-24</sub> values were dose-normalized for isoniazid at 10 mg/kg, rifampicin at 15 mg/kg, pyrazinamide at 35 mg/kg, and ethambutol at 20 mg/kg.

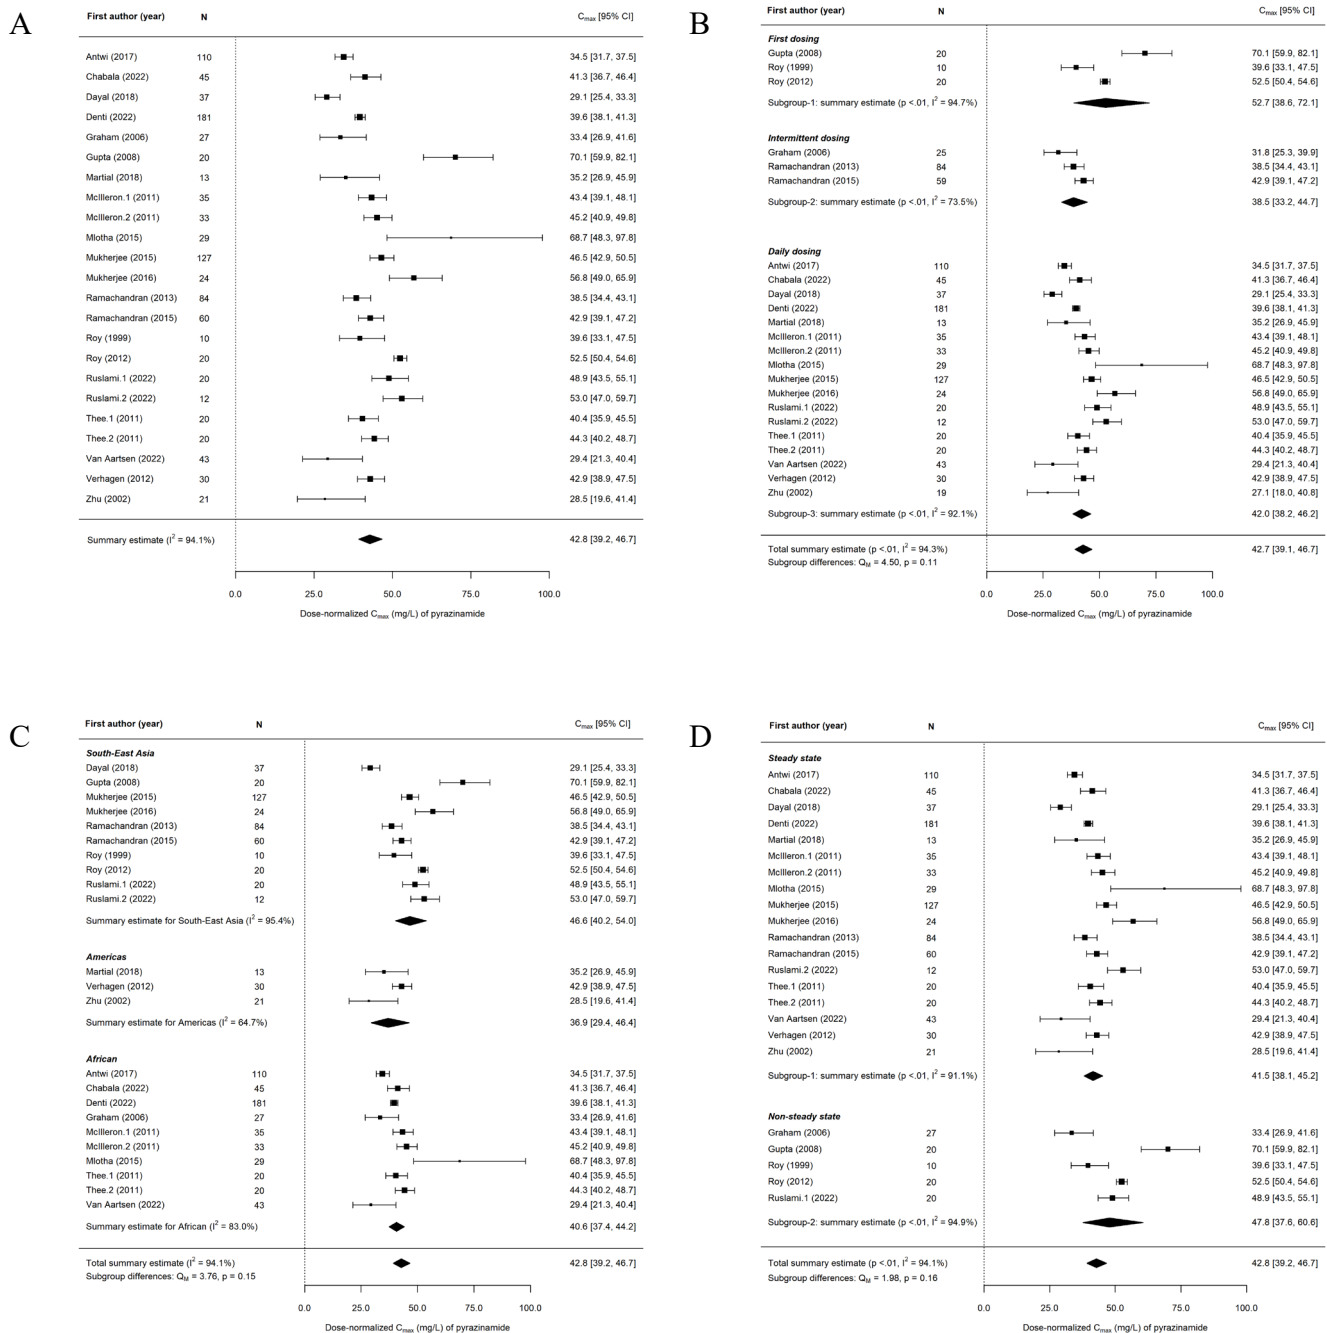

**Figure E6. Forest plots for summary estimates (geometric means [95% CIs]) of dose-normalized  $C_{max}$  for pyrazinamide in all children and adolescents with tuberculosis (A), stratified by dosing intervals (B), World Health Organization Regions (C), and pharmacokinetic sampling schedules (D).**

$C_{max}$ : peak plasma concentration;  $I^2$ : the percentage of variation across studies that is due to heterogeneity,  $Q_M$ : the omnibus test of all model coefficients.  $C_{max}$  values were dose-normalized for isoniazid at 10 mg/kg, rifampicin at 15 mg/kg, pyrazinamide at 35 mg/kg, and ethambutol at 20 mg/kg.

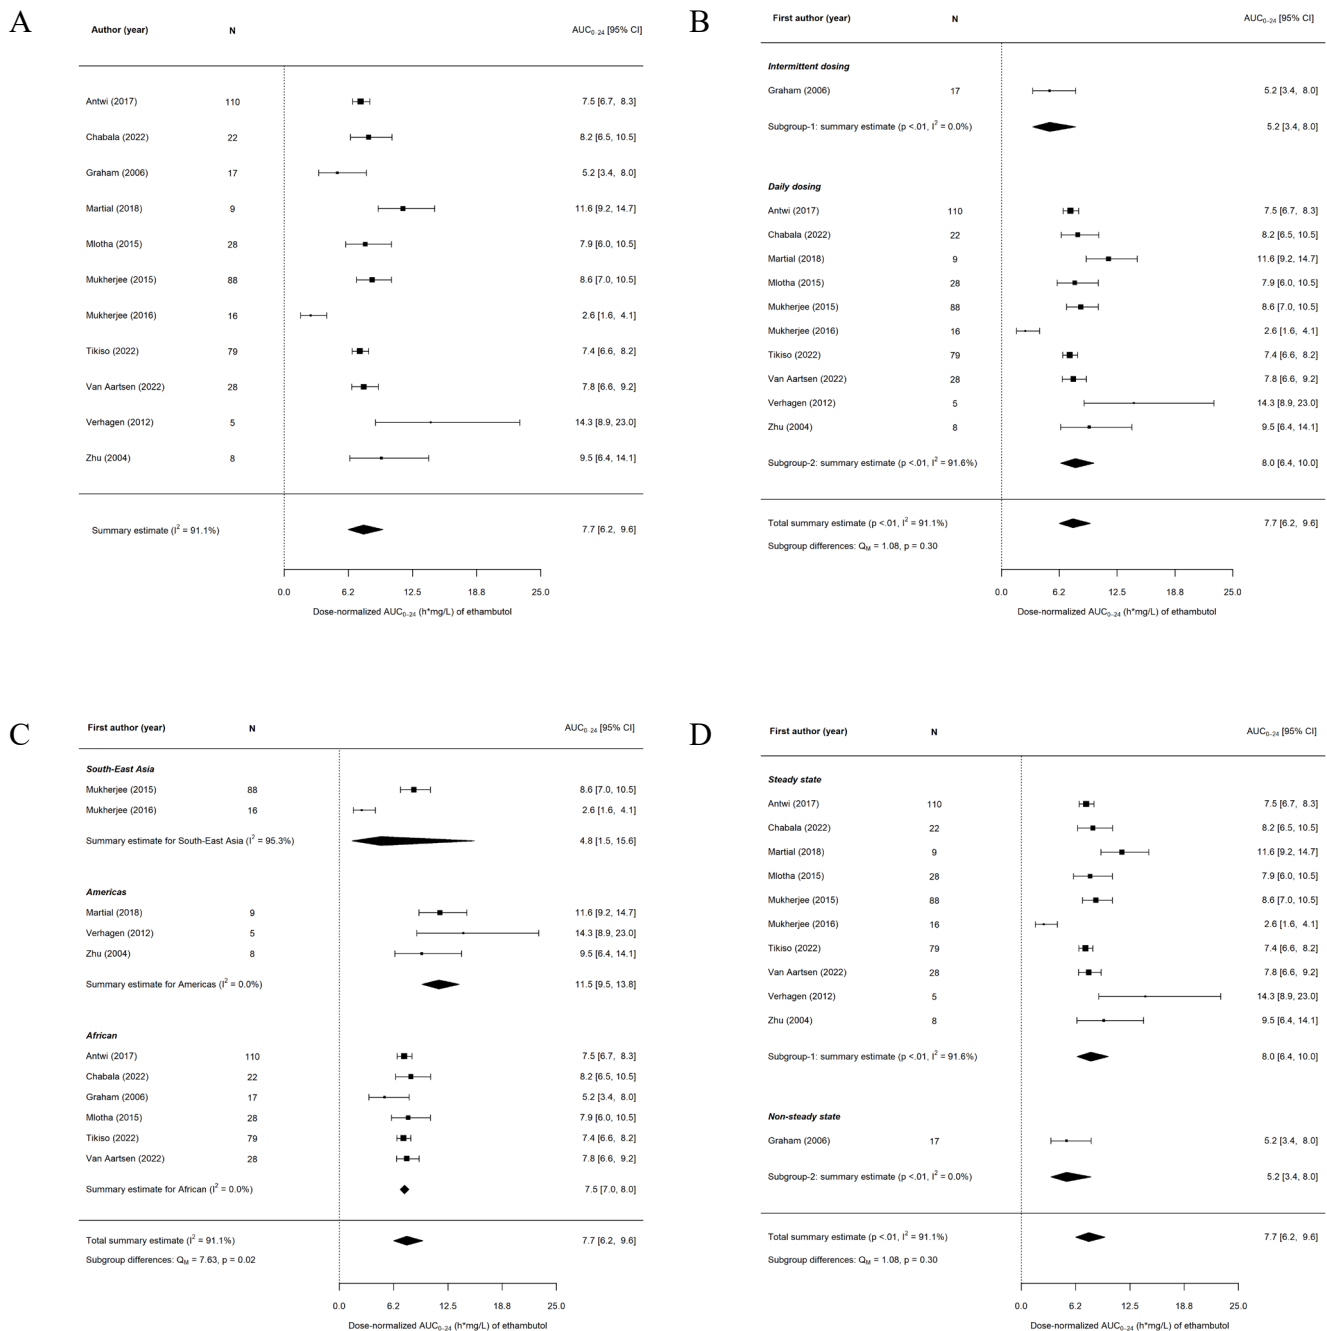

**Figure E7. Forest plots for summary estimates (geometric means [95% CIs]) of dose-normalized  $AUC_{0-24}$  for ethambutol in all children and adolescents with tuberculosis (A), stratified by dosing intervals (B), World Health Organization Regions (C), and pharmacokinetic sampling schedules (D).**

$AUC_{0-24}$ : area under the concentration-time curve from 0 to 24 hours post-dose;  $I^2$ : the percentage of variation across studies that is due to heterogeneity,  $Q_M$ : the omnibus test of all model coefficients.  $AUC_{0-24}$  values were dose-normalized for isoniazid at 10 mg/kg, rifampicin at 15 mg/kg, pyrazinamide at 35 mg/kg, and ethambutol at 20 mg/kg.

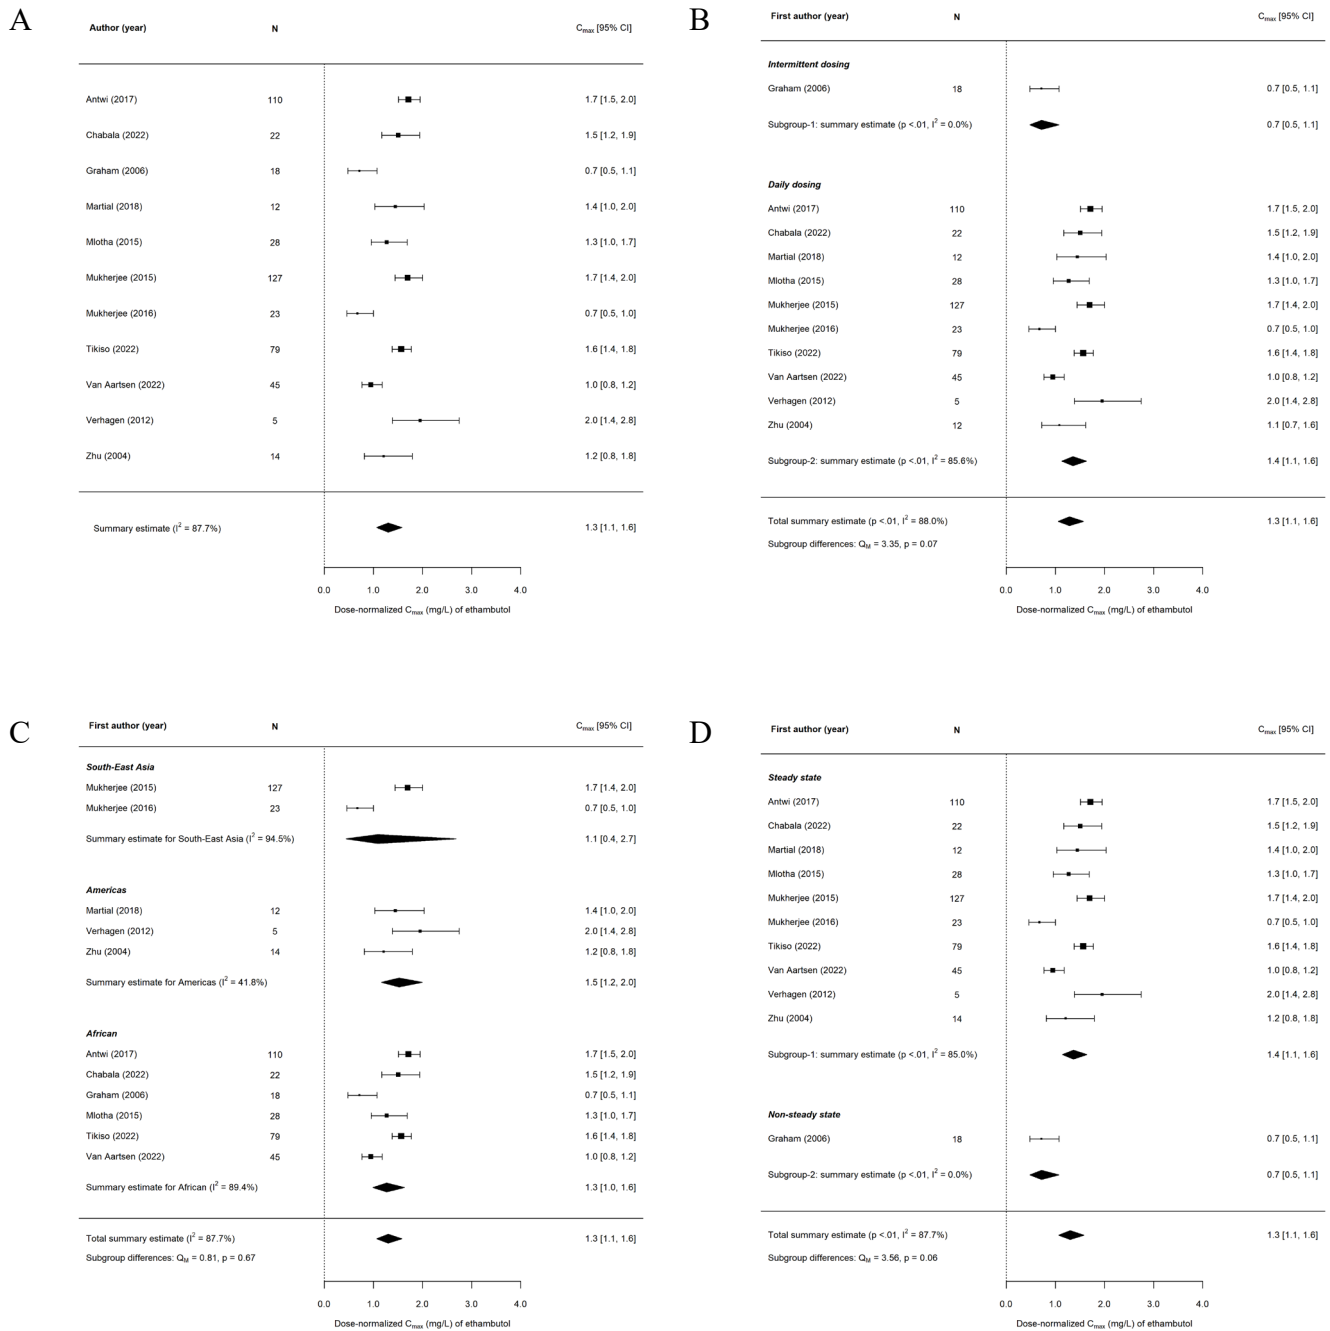

**Figure E8. Forest plots for summary estimates (geometric means [95% CIs]) of dose-normalized  $C_{max}$  for ethambutol in all children and adolescents with tuberculosis (A), stratified by dosing intervals (B), World Health Organization Regions (C), and pharmacokinetic sampling schedules (D).**

$C_{max}$ : peak plasma concentration;  $I^2$ : the percentage of variation across studies that is due to heterogeneity,  $Q_M$ : the omnibus test of all model coefficients.  $C_{max}$  values were dose-normalized for isoniazid at 10 mg/kg, rifampicin at 15 mg/kg, pyrazinamide at 35 mg/kg, and ethambutol at 20 mg/kg.

**Table E7. Linear mixed-effects models of dose-adjusted AUC<sub>0-24</sub> in log-transformed values for isoniazid in children and adolescents with tuberculosis, by patient characteristics.**

| Patient characteristics                                   | Fixed-effects coefficient<br>(95% CI) | Random effects for each model <sup>§</sup> |                        |                              |                        |      |                            | Obs. <sup>§§</sup> | Cond.<br>R <sup>2</sup> |
|-----------------------------------------------------------|---------------------------------------|--------------------------------------------|------------------------|------------------------------|------------------------|------|----------------------------|--------------------|-------------------------|
|                                                           |                                       | $\sigma^2$                                 | $\tau_{00}$<br>studies | $\tau_{11}$<br>studies*doses | $\rho_{01}$<br>studies | ICC  | N <sup>§§</sup><br>studies |                    |                         |
| Age, years <sup>†</sup>                                   | 0.09 (0.04–0.14)***                   | 0.50                                       | 0.17                   | 0.04                         | -0.75                  | 0.26 | 27                         | 1252               | 0.403                   |
| Age                                                       |                                       |                                            |                        |                              |                        |      |                            |                    |                         |
| <2 years                                                  | -0.29 (-0.43–0.15)***                 | 0.50                                       | 0.17                   | 0.03                         | -0.76                  | 0.26 | 27                         | 1252               | 0.402                   |
| 2-4 years                                                 | -0.12 (-0.25–0.01) <sup>#</sup>       |                                            |                        |                              |                        |      |                            |                    |                         |
| 5-9 years                                                 | -0.08 (-0.19–0.04)                    |                                            |                        |                              |                        |      |                            |                    |                         |
| 10-14 years                                               | Ref.                                  |                                            |                        |                              |                        |      |                            |                    |                         |
| 15-18 years                                               | 0.01 (-0.33–0.35)                     |                                            |                        |                              |                        |      |                            |                    |                         |
| Sex                                                       |                                       |                                            |                        |                              |                        |      |                            |                    |                         |
| Female                                                    | Ref.                                  | 0.50                                       | 0.17                   | 0.04                         | -0.73                  | 0.26 | 27                         | 1252               | 0.397                   |
| Male                                                      | -0.07 (-0.15–0.01) <sup>#</sup>       |                                            |                        |                              |                        |      |                            |                    |                         |
| Weight-for-age Z-score (WFAZ) <sup>†</sup>                | 0.08 (0.03–0.12)**                    | 0.48                                       | 0.19                   | 0.04                         | -0.83                  | 0.27 | 26                         | 979                | 0.404                   |
| Underweight                                               |                                       |                                            |                        |                              |                        |      |                            |                    |                         |
| No                                                        | Ref.                                  | 0.48                                       | 0.18                   | 0.04                         | -0.86                  | 0.27 | 26                         | 979                | 0.393                   |
| Yes, moderate (-3≤WFAZ<-2)                                | -0.07 (-0.18–0.05)                    |                                            |                        |                              |                        |      |                            |                    |                         |
| Yes, severe (WFAZ<-3)                                     | -0.10 (-0.22–0.02)                    |                                            |                        |                              |                        |      |                            |                    |                         |
| Height-for-age Z-score (HFAZ) <sup>†</sup>                | 0.08 (0.03–0.12)**                    | 0.52                                       | 0.14                   | 0.04                         | -0.83                  | 0.22 | 22                         | 1112               | 0.378                   |
| Stunted                                                   |                                       |                                            |                        |                              |                        |      |                            |                    |                         |
| No                                                        | Ref.                                  | 0.52                                       | 0.14                   | 0.04                         | -0.85                  | 0.22 | 22                         | 1112               | 0.373                   |
| Yes, moderate (-3≤HFAZ<-2)                                | -0.08 (-0.19–0.03)                    |                                            |                        |                              |                        |      |                            |                    |                         |
| Yes, severe (HFAZ<-3)                                     | -0.13 (-0.24–0.02)*                   |                                            |                        |                              |                        |      |                            |                    |                         |
| Weight-for-height Z-score (WFHZ) <sup>†</sup>             | 0.06 (0.01–0.11)*                     | 0.50                                       | 0.14                   | 0.05                         | -0.93                  | 0.21 | 22                         | 802                | 0.379                   |
| Wasted                                                    |                                       |                                            |                        |                              |                        |      |                            |                    |                         |
| No                                                        | Ref.                                  | 0.50                                       | 0.14                   | 0.05                         | -0.94                  | 0.22 | 22                         | 802                | 0.377                   |
| Yes, moderate (-3≤WFHZ<-2)                                | -0.12 (-0.28–0.04)                    |                                            |                        |                              |                        |      |                            |                    |                         |
| Yes, severe (WFHZ<-3)                                     | -0.06 (-0.24–0.13)                    |                                            |                        |                              |                        |      |                            |                    |                         |
| BMI-for-age Z-score (BFAZ) <sup>†</sup>                   | 0.04 (-0.01–0.09)                     | 0.53                                       | 0.14                   | 0.04                         | -0.85                  | 0.21 | 22                         | 1111               | 0.369                   |
| Low BMI                                                   |                                       |                                            |                        |                              |                        |      |                            |                    |                         |
| No                                                        | Ref.                                  | 0.53                                       | 0.14                   | 0.04                         | -0.85                  | 0.21 | 22                         | 1111               | 0.367                   |
| Yes, moderate (-3≤BFAZ<-2)                                | -0.04 (-0.17–0.09)                    |                                            |                        |                              |                        |      |                            |                    |                         |
| Yes, severe (BFAZ<-3)                                     | -0.05 (-0.19–0.10)                    |                                            |                        |                              |                        |      |                            |                    |                         |
| Malnourished <sup>†</sup>                                 |                                       |                                            |                        |                              |                        |      |                            |                    |                         |
| No                                                        | Ref.                                  | 0.52                                       | 0.14                   | 0.04                         | -0.85                  | 0.22 | 24                         | 1118               | 0.368                   |
| Yes, moderate                                             | -0.07 (-0.17–0.04)                    |                                            |                        |                              |                        |      |                            |                    |                         |
| Yes, severe                                               | -0.13 (-0.24–0.03)*                   |                                            |                        |                              |                        |      |                            |                    |                         |
| Type of tuberculosis                                      |                                       |                                            |                        |                              |                        |      |                            |                    |                         |
| Pulmonary                                                 | Ref.                                  | 0.47                                       | 0.18                   | 0.05                         | -0.72                  | 0.28 | 23                         | 1089               | 0.410                   |
| Extrapulmonary                                            | 0.05 (-0.07–0.16)                     |                                            |                        |                              |                        |      |                            |                    |                         |
| Pulmonary + extrapulmonary                                | -0.09 (-0.26–0.07)                    |                                            |                        |                              |                        |      |                            |                    |                         |
| HIV status                                                |                                       |                                            |                        |                              |                        |      |                            |                    |                         |
| Negative                                                  | Ref.                                  | 0.53                                       | 0.14                   | 0.04                         | -0.73                  | 0.22 | 23                         | 1129               | 0.377                   |
| Positive                                                  | -0.17 (-0.30–0.04)**                  |                                            |                        |                              |                        |      |                            |                    |                         |
| Drug administration                                       |                                       |                                            |                        |                              |                        |      |                            |                    |                         |
| Taken whole orally                                        | Ref.                                  | 0.42                                       | 0.03                   | 0.02                         | 0.29                   | 0.15 | 5                          | 313                | 0.373                   |
| Crushed/dispersed/via NGT                                 | 0.08 (-0.08–0.24)                     |                                            |                        |                              |                        |      |                            |                    |                         |
| Creatinine clearance, mL/min <sup>*,††</sup>              | 0.03 (-0.05–0.11)                     | 0.43                                       | 0.03                   | -                            | -                      | 0.07 | 10                         | 322                | 0.213                   |
| Serum albumin, g/dL <sup>†</sup>                          | -0.08 (-0.16–0.01)*                   | 0.50                                       | 0.36                   | -                            | -                      | 0.42 | 11                         | 598                | 0.486                   |
| Hypoalbuminemia                                           |                                       |                                            |                        |                              |                        |      |                            |                    |                         |
| No, ≥3.5 g/dL                                             | Ref.                                  | 0.48                                       | 0.26                   | 0.11                         | -0.95                  | 0.28 | 11                         | 598                | 0.396                   |
| Yes, <3.5 g/dL                                            | 0.09 (-0.06–0.24)                     |                                            |                        |                              |                        |      |                            |                    |                         |
| Acetylase status, NAT2 genotype <sup>‡</sup>              |                                       |                                            |                        |                              |                        |      |                            |                    |                         |
| Slow                                                      | 0.69 (0.59–0.80)***                   | 0.31                                       | 0.04                   | 0.03                         | -0.44                  | 0.17 | 10                         | 566                | 0.551                   |
| Intermediate                                              | Ref.                                  |                                            |                        |                              |                        |      |                            |                    |                         |
| Rapid                                                     | -0.29 (-0.42–0.15)***                 |                                            |                        |                              |                        |      |                            |                    |                         |
| Acetylase status, t <sub>1/2</sub> phenotype <sup>‡</sup> |                                       |                                            |                        |                              |                        |      |                            |                    |                         |
| Slow                                                      | 0.68 (0.60–0.76)***                   | 0.35                                       | 0.12                   | 0.03                         | -0.67                  | 0.27 | 27                         | 1203               | 0.570                   |
| Intermediate                                              | Ref.                                  |                                            |                        |                              |                        |      |                            |                    |                         |
| Rapid                                                     | -0.39 (-0.51–0.28)***                 |                                            |                        |                              |                        |      |                            |                    |                         |

Data are presented as fixed-effects coefficients (beta coefficients) and 95% confidence intervals (CI), unless stated otherwise: <sup>§</sup>mean or <sup>§§</sup>number. AUC<sub>0-24</sub>: area under the plasma concentration-time curve from 0 to 24 hours after dosing; BMI: body mass index; HIV: human immunodeficiency virus; NGT: nasogastric tube;  $\sigma^2$ : residual variance,  $\tau_{00}$ : random intercept variance,  $\tau_{11}$ : random slope variance,  $\rho_{01}$ : random slope-intercept correlation, ICC: intraclass correlation coefficient, N: number of included studies, conditional R<sup>2</sup>: the proportion of variance explained by both the fixed and random effects. Obs.: observations; Cond.: conditional. <sup>†</sup>All continuous variables were mean-centred by subtracting the mean from each data point, then standardized by dividing each point by the standard deviation. <sup>‡</sup>Moderate malnutrition was defined as WFAZ or HFAZ ≥-3 but <-2 in children aged <5 years, and HFAZ or BFAZ ≥-3 but <-2 in children aged ≥5 years; and severe malnutrition was defined as WFAZ or HFAZ <-3 in children aged <5 years, and HFAZ or BFAZ <-3 in children aged ≥5 years. <sup>††</sup> Model for creatinine clearance was adjusted for drug dose and age. <sup>‡</sup>Details are described in Appendix 4. \*\*\*p<0.001, \*\*p<0.01, \*p<0.05, #p<0.1.

**Table E8. Linear mixed-effects models of dose-adjusted  $C_{max}$  in log-transformed values for isoniazid in children and adolescents with tuberculosis, by patient characteristics.**

| Patient characteristics                                    | Fixed-effects coefficient<br>(95% CI) | Random effects for each model |                        |                              |                        |      |                           | Obs. <sup>§§</sup> | Cond.<br>R <sup>2</sup> |
|------------------------------------------------------------|---------------------------------------|-------------------------------|------------------------|------------------------------|------------------------|------|---------------------------|--------------------|-------------------------|
|                                                            |                                       | $\sigma^2$                    | $\tau_{00}$<br>studies | $\tau_{11}$<br>studies*doses | $\rho_{01}$<br>studies | ICC  | N <sup>§</sup><br>studies |                    |                         |
| Age, years <sup>†</sup>                                    | 0.07 (0.03–0.11)***                   | 0.38                          | 0.16                   | 0.06                         | -0.40                  | 0.34 | 27                        | 1292               | 0.466                   |
| Age                                                        |                                       |                               |                        |                              |                        |      |                           |                    |                         |
| <2 years                                                   | -0.27 (-0.40–0.15)***                 | 0.38                          | 0.16                   | 0.06                         | -0.39                  | 0.34 | 27                        | 1292               | 0.470                   |
| 2-4 years                                                  | -0.09 (-0.21–0.02) <sup>#</sup>       |                               |                        |                              |                        |      |                           |                    |                         |
| 5-9 years                                                  | -0.05 (-0.15–0.05)                    |                               |                        |                              |                        |      |                           |                    |                         |
| 10-14 years                                                | Ref.                                  |                               |                        |                              |                        |      |                           |                    |                         |
| 15-18 years                                                | -0.08 (-0.38–0.21)                    |                               |                        |                              |                        |      |                           |                    |                         |
| Sex                                                        |                                       |                               |                        |                              |                        |      |                           |                    |                         |
| Female                                                     | Ref.                                  | 0.39                          | 0.16                   | 0.06                         | -0.42                  | 0.33 | 27                        | 1292               | 0.455                   |
| Male                                                       | -0.06 (-0.13–0.01)                    |                               |                        |                              |                        |      |                           |                    |                         |
| Weight-for-age Z-score (WFAZ) <sup>†</sup>                 | 0.08 (0.04–0.12)**                    | 0.36                          | 0.18                   | 0.07                         | -0.43                  | 0.38 | 26                        | 1008               | 0.497                   |
| Underweight                                                |                                       |                               |                        |                              |                        |      |                           |                    |                         |
| No                                                         | Ref.                                  | 0.36                          | 0.18                   | 0.07                         | -0.46                  | 0.37 | 26                        | 1008               | 0.846                   |
| Yes, moderate (-3≤WFAZ<-2)                                 | -0.06 (-0.16–0.04)                    |                               |                        |                              |                        |      |                           |                    |                         |
| Yes, severe (WFAZ<-3)                                      | -0.10 (-0.20–0.00) <sup>#</sup>       |                               |                        |                              |                        |      |                           |                    |                         |
| Height-for-age Z-score (HFAZ) <sup>†</sup>                 | 0.06 (0.02–0.10)**                    | 0.41                          | 0.15                   | 0.04                         | -0.67                  | 0.29 | 22                        | 1151               | 0.424                   |
| Stunted                                                    |                                       |                               |                        |                              |                        |      |                           |                    |                         |
| No                                                         | Ref.                                  | 0.41                          | 0.15                   | 0.04                         | -0.69                  | 0.28 | 22                        | 1151               | 0.420                   |
| Yes, moderate (-3≤HFAZ<-2)                                 | -0.07 (-0.17–0.02)                    |                               |                        |                              |                        |      |                           |                    |                         |
| Yes, severe (HFAZ<-3)                                      | -0.10 (-0.20–0.001) <sup>*</sup>      |                               |                        |                              |                        |      |                           |                    |                         |
| Weight-for-height Z-score (WFHZ) <sup>†</sup>              | 0.07 (0.03–0.12)**                    | 0.38                          | 0.18                   | 0.06                         | -0.95                  | 0.31 | 22                        | 823                | 0.459                   |
| Wasted                                                     |                                       |                               |                        |                              |                        |      |                           |                    |                         |
| No                                                         | Ref.                                  | 0.38                          | 0.18                   | 0.06                         | -0.95                  | 0.31 | 22                        | 823                | 0.455                   |
| Yes, moderate (-3≤WFHZ<-2)                                 | -0.16 (-0.30–0.02) <sup>*</sup>       |                               |                        |                              |                        |      |                           |                    |                         |
| Yes, severe (WFHZ<-3)                                      | -0.11 (-0.28–0.05)                    |                               |                        |                              |                        |      |                           |                    |                         |
| BMI-for-age Z-score (BFAZ) <sup>†</sup>                    | 0.05 (0.01–0.09) <sup>*</sup>         | 0.42                          | 0.16                   | 0.03                         | -0.82                  | 0.27 | 22                        | 1150               | 0.415                   |
| Low BMI                                                    |                                       |                               |                        |                              |                        |      |                           |                    |                         |
| No                                                         | Ref.                                  | 0.42                          | 0.16                   | 0.04                         | -0.78                  | 0.28 | 22                        | 1150               | 0.412                   |
| Yes, moderate (-3≤BFAZ<-2)                                 | -0.03 (-0.14–0.09)                    |                               |                        |                              |                        |      |                           |                    |                         |
| Yes, severe (BFAZ <-3)                                     | -0.06 (-0.19–0.07)                    |                               |                        |                              |                        |      |                           |                    |                         |
| Malnourished <sup>††</sup>                                 |                                       |                               |                        |                              |                        |      |                           |                    |                         |
| No                                                         | Ref.                                  | 0.42                          | 0.16                   | 0.04                         | -0.75                  | 0.28 | 24                        | 1158               | 0.416                   |
| Yes, moderate                                              | -0.04 (-0.13–0.06)                    |                               |                        |                              |                        |      |                           |                    |                         |
| Yes, severe                                                | -0.11 (-0.21–0.02) <sup>*</sup>       |                               |                        |                              |                        |      |                           |                    |                         |
| Type of tuberculosis                                       |                                       |                               |                        |                              |                        |      |                           |                    |                         |
| Pulmonary                                                  | Ref.                                  | 0.38                          | 0.18                   | 0.08                         | -0.36                  | 0.37 | 23                        | 1129               | 0.467                   |
| Extrapulmonary                                             | 0.02 (-0.09–0.12)                     |                               |                        |                              |                        |      |                           |                    |                         |
| Pulmonary + extrapulmonary                                 | -0.04 (-0.18–0.11)                    |                               |                        |                              |                        |      |                           |                    |                         |
| HIV status                                                 |                                       |                               |                        |                              |                        |      |                           |                    |                         |
| Negative                                                   | Ref.                                  | 0.41                          | 0.15                   | 0.06                         | -0.40                  | 0.31 | 23                        | 1166               | 0.454                   |
| Positive                                                   | -0.17 (-0.28–0.06)**                  |                               |                        |                              |                        |      |                           |                    |                         |
| Drug administration                                        |                                       |                               |                        |                              |                        |      |                           |                    |                         |
| Taken whole orally                                         | Ref.                                  | 0.28                          | 0.00                   | 0.02                         | 0.63                   | 0.13 | 5                         | 315                | 0.415                   |
| Crushed/dispersed/via NGT                                  | 0.10 (-0.03–0.23)                     |                               |                        |                              |                        |      |                           |                    |                         |
| Creatinine clearance, mL/min <sup>§,††</sup>               | 0.10 (0.02–0.18) <sup>*</sup>         | 0.35                          | 0.18                   | -                            | -                      | 0.34 | 10                        | 330                | 0.406                   |
| Serum albumin, g/dL <sup>†</sup>                           | -0.06 (-0.13–0.00) <sup>#</sup>       | 0.38                          | 0.32                   | -                            | -                      | 0.45 | 11                        | 615                | 0.523                   |
| Hypoalbuminemia                                            |                                       |                               |                        |                              |                        |      |                           |                    |                         |
| No, ≥3.5 g/dL                                              | Ref.                                  | 0.36                          | 0.23                   | 0.13                         | -0.66                  | 0.41 | 11                        | 615                | 0.476                   |
| Yes, <3.5 g/dL                                             | 0.05 (-0.08–0.18)                     |                               |                        |                              |                        |      |                           |                    |                         |
| Acetylator status, NAT2 genotype <sup>‡</sup>              |                                       |                               |                        |                              |                        |      |                           |                    |                         |
| Slow                                                       | 0.31 (0.22–0.39)***                   | 0.22                          | 0.02                   | 0.03                         | -0.44                  | 0.19 | 10                        | 570                | 0.528                   |
| Intermediate                                               | Ref.                                  |                               |                        |                              |                        |      |                           |                    |                         |
| Rapid                                                      | -0.11 (-0.22–0.01) <sup>#</sup>       |                               |                        |                              |                        |      |                           |                    |                         |
| Acetylator status, t <sub>1/2</sub> phenotype <sup>‡</sup> |                                       |                               |                        |                              |                        |      |                           |                    |                         |
| Slow                                                       | 0.21 (0.14–0.29)***                   | 0.31                          | 0.12                   | 0.06                         | -0.31                  | 0.34 | 27                        | 1203               | 0.505                   |
| Intermediate                                               | Ref.                                  |                               |                        |                              |                        |      |                           |                    |                         |
| Rapid                                                      | -0.14 (-0.24–0.03) <sup>*</sup>       |                               |                        |                              |                        |      |                           |                    |                         |

Data are presented as fixed-effects coefficients (beta coefficients) and 95% confidence intervals (CI), unless stated otherwise: §mean or §§number.  $C_{max}$ : maximum plasma concentration; BMI: body mass index; HIV: human immunodeficiency virus; NGT: nasogastric tube,  $\sigma^2$ : residual variance,  $\tau_{00}$ : random intercept variance,  $\tau_{11}$ : random slope variance,  $\rho_{01}$ : random slope-intercept correlation, ICC: intraclass correlation coefficient, N: number of included studies, conditional R<sup>2</sup>: the proportion of variance explained by both the fixed and random effects. Obs.: observations; Cond.: conditional. <sup>†</sup>All continuous variables were mean-centred by subtracting the mean from each data point, then standardized by dividing each point by the standard deviation. <sup>‡</sup>Moderate malnutrition was defined as WFAZ or HFAZ ≥-3 but <-2 in children aged <5 years, and HFAZ or BFAZ ≥-3 but <-2 in children aged ≥5 years; and severe malnutrition was defined as WFAZ or HFAZ <-3 in children aged <5 years, and HFAZ or BFAZ <-3 in children aged ≥5 years. <sup>††</sup> Model for creatinine clearance was adjusted for drug dose and age. <sup>‡</sup>Details are described in Appendix 4. \*\*\*p<0.001, \*\*p<0.01, \*p<0.05, #p<0.1.

**Table E9. Linear mixed-effects models of dose-adjusted AUC<sub>0-24</sub> in log-transformed values for rifampicin in children and adolescents with tuberculosis, by patient characteristics.**

| Patient characteristics                       | Fixed-effects coefficient (95% CI) | Random effects for each model <sup>§</sup> |                        |                              |                        |      |                            | Obs. <sup>§§</sup> | Cond. R <sup>2</sup> |
|-----------------------------------------------|------------------------------------|--------------------------------------------|------------------------|------------------------------|------------------------|------|----------------------------|--------------------|----------------------|
|                                               |                                    | $\sigma^2$                                 | $\tau_{00}$<br>studies | $\tau_{11}$<br>studies*doses | $\rho_{01}$<br>studies | ICC  | N <sup>§§</sup><br>studies |                    |                      |
| Age, years <sup>†</sup>                       | 0.18 (0.13–0.24)***                | 0.47                                       | 0.13                   | 0.13                         | -0.12                  | 0.37 | 22                         | 1041               | 0.631                |
| Age                                           |                                    |                                            |                        |                              |                        |      |                            |                    |                      |
| <2 years                                      | -0.48 (-0.63–-0.33)***             | 0.47                                       | 0.14                   | 0.12                         | -0.18                  | 0.37 | 22                         | 1041               | 0.624                |
| 2-4 years                                     | -0.35 (-0.49–-0.21)***             |                                            |                        |                              |                        |      |                            |                    |                      |
| 5-9 years                                     | -0.13 (-0.26–0.00)                 |                                            |                        |                              |                        |      |                            |                    |                      |
| 10-14 years                                   | Ref.                               |                                            |                        |                              |                        |      |                            |                    |                      |
| 15-18 years                                   | 0.22 (-0.16–0.60)                  |                                            |                        |                              |                        |      |                            |                    |                      |
| Sex                                           |                                    |                                            |                        |                              |                        |      |                            |                    |                      |
| Female                                        | Ref.                               | 0.49                                       | 0.16                   | 0.11                         | -0.17                  | 0.37 | 22                         | 1041               | 0.582                |
| Male                                          | -0.05 (-0.14–0.04)                 |                                            |                        |                              |                        |      |                            |                    |                      |
| Weight-for-age Z-score (WFAZ) <sup>†</sup>    | 0.04 (-0.02–0.09)                  | 0.52                                       | 0.15                   | n/a                          | n/a                    | 0.23 | 22                         | 843                | 0.402                |
| Underweight                                   |                                    |                                            |                        |                              |                        |      |                            |                    |                      |
| No                                            | Ref.                               | 0.52                                       | 0.15                   | n/a                          | n/a                    | 0.23 | 22                         | 843                | 0.397                |
| Yes, moderate (-3≤WFAZ<-2)                    | -0.02 (-0.15–0.11)                 |                                            |                        |                              |                        |      |                            |                    |                      |
| Yes, severe (WFAZ<-3)                         | 0.01 (-0.14–0.16)                  |                                            |                        |                              |                        |      |                            |                    |                      |
| Height-for-age Z-score (HFAZ) <sup>†</sup>    | 0.08 (0.04–0.13)**                 | 0.49                                       | 0.15                   | 0.13                         | -0.18                  | 0.38 | 22                         | 1035               | 0.599                |
| Stunted                                       |                                    |                                            |                        |                              |                        |      |                            |                    |                      |
| No                                            | Ref.                               | 0.49                                       | 0.15                   | 0.12                         | -0.16                  | 0.37 | 22                         | 1035               | 0.594                |
| Yes, moderate (-3≤HFAZ<-2)                    | -0.11 (-0.22–0.00) <sup>#</sup>    |                                            |                        |                              |                        |      |                            |                    |                      |
| Yes, severe (HFAZ<-3)                         | -0.13 (-0.25–-0.01)*               |                                            |                        |                              |                        |      |                            |                    |                      |
| Weight-for-height Z-score (WFHZ) <sup>†</sup> | 0.01 (-0.07–0.05)                  | 0.48                                       | 0.15                   | 0.21                         | 0.26                   | 0.49 | 22                         | 753                | 0.721                |
| Wasted                                        |                                    |                                            |                        |                              |                        |      |                            |                    |                      |
| No                                            | Ref.                               | 0.48                                       | 0.16                   | 0.21                         | 0.27                   | 0.49 | 22                         | 753                | 0.717                |
| Yes, moderate (-3≤WFHZ<-2)                    | 0.10 (-0.06–0.27)                  |                                            |                        |                              |                        |      |                            |                    |                      |
| Yes, severe (WFHZ<-3)                         | 0.15 (-0.06–0.37)                  |                                            |                        |                              |                        |      |                            |                    |                      |
| BMI-for-age Z-score (BFAZ) <sup>†</sup>       | -0.05 (-0.10–-0.001)*              | 0.49                                       | 0.15                   | 0.12                         | -0.16                  | 0.37 | 22                         | 1034               | 0.583                |
| Low BMI                                       |                                    |                                            |                        |                              |                        |      |                            |                    |                      |
| No                                            | Ref.                               | 0.49                                       | 0.15                   | 0.13                         | -0.07                  | 0.39 | 22                         | 1034               | 0.591                |
| Yes, moderate (-3≤BFAZ<-2)                    | 0.27 (0.14–0.41)***                |                                            |                        |                              |                        |      |                            |                    |                      |
| Yes, severe (BFAZ <-3)                        | 0.14 (-0.02–0.30) <sup>#</sup>     |                                            |                        |                              |                        |      |                            |                    |                      |
| Malnourished <sup>†</sup>                     |                                    |                                            |                        |                              |                        |      |                            |                    |                      |
| No                                            | Ref.                               | 0.49                                       | 0.15                   | 0.12                         | -0.19                  | 0.37 | 22                         | 1035               | 0.585                |
| Yes, moderate                                 | -0.003 (-0.11–0.11)                |                                            |                        |                              |                        |      |                            |                    |                      |
| Yes, severe                                   | -0.07 (-0.18–0.05)                 |                                            |                        |                              |                        |      |                            |                    |                      |
| Type of tuberculosis                          |                                    |                                            |                        |                              |                        |      |                            |                    |                      |
| Pulmonary                                     | Ref.                               | 0.48                                       | 0.16                   | 0.11                         | -0.13                  | 0.39 | 18                         | 903                | 0.590                |
| Extrapulmonary                                | 0.11 (-0.03–0.25)                  |                                            |                        |                              |                        |      |                            |                    |                      |
| Pulmonary + extrapulmonary                    | -0.04 (-0.21–0.14)                 |                                            |                        |                              |                        |      |                            |                    |                      |
| HIV status                                    |                                    |                                            |                        |                              |                        |      |                            |                    |                      |
| Negative                                      | Ref.                               | 0.50                                       | 0.13                   | 0.14                         | -0.26                  | 0.37 | 21                         | 990                | 0.604                |
| Positive                                      | -0.23 (-0.37–-0.09)**              |                                            |                        |                              |                        |      |                            |                    |                      |
| Drug administration                           |                                    |                                            |                        |                              |                        |      |                            |                    |                      |
| Taken whole orally                            | Ref.                               | 0.45                                       | 0.18                   | n/a                          | n/a                    | 0.29 | 7                          | 370                | 0.520                |
| Crushed/dispersed/via NGT                     | -0.02 (-0.18–0.13)                 |                                            |                        |                              |                        |      |                            |                    |                      |
| Creatinine clearance, mL/min <sup>†,††</sup>  | 0.05 (-0.04–0.13)                  | 0.32                                       | 0.17                   | n/a                          | n/a                    | 0.35 | 12                         | 415                | 0.555                |
| Serum albumin, g/dL <sup>†</sup>              | -0.05 (-0.13–0.02)                 | 0.50                                       | 0.21                   | n/a                          | n/a                    | 0.29 | 12                         | 611                | 0.457                |
| Hypoalbuminemia                               |                                    |                                            |                        |                              |                        |      |                            |                    |                      |
| No, ≥3.5 g/dL                                 | Ref.                               | 0.50                                       | 0.20                   | n/a                          | n/a                    | 0.29 | 12                         | 611                | 0.458                |
| Yes, <3.5 g/dL                                | 0.17 (-0.001–0.33) <sup>#</sup>    |                                            |                        |                              |                        |      |                            |                    |                      |
| SLCO1B1 rs4149032                             |                                    |                                            |                        |                              |                        |      |                            |                    |                      |
| CC                                            | Ref.                               | 0.37                                       | 0.03                   | n/a                          | n/a                    | 0.08 | 2                          | 190                | 0.163                |
| CT                                            | -0.11 (-0.33–0.11)                 |                                            |                        |                              |                        |      |                            |                    |                      |
| TT                                            | -0.34 (-0.61–-0.08)*               |                                            |                        |                              |                        |      |                            |                    |                      |

Data are presented as fixed-effects coefficients (beta coefficients) and 95% confidence intervals (CI), unless stated otherwise: <sup>§</sup>mean or <sup>§§</sup>number. AUC<sub>0-24</sub>: area under the plasma concentration-time curve from 0 to 24 hours after dosing; BMI: body mass index; HIV: human immunodeficiency virus; NGT: nasogastric tube,  $\sigma^2$ : residual variance,  $\tau_{00}$ : random intercept variance,  $\tau_{11}$ : random slope variance,  $\rho_{01}$ : random slope-intercept correlation, ICC: intraclass correlation coefficient, N: number of included studies, conditional R<sup>2</sup>: the proportion of variance explained by both the fixed and random effects. Obs.: observations; Cond.: conditional. <sup>†</sup>All continuous variables were mean-centred by subtracting the mean from each data point, then standardized by dividing each point by the standard deviation. <sup>†</sup>Moderate malnutrition was defined as WFAZ or HFAZ ≥-3 but <-2 in children aged <5 years, and HFAZ or BFAZ ≥-3 but <-2 in children aged ≥5 years; and severe malnutrition was defined as WFAZ or HFAZ <-3 in children aged <5 years, and HFAZ or BFAZ <-3 in children aged ≥5 years. <sup>††</sup> Model for creatinine clearance was adjusted for drug dose and age. \*\*\*p<0.001, \*\*p<0.01, \*p<0.05, #p<0.1.

**Table E10. Linear mixed-effects models of dose-adjusted C<sub>max</sub> in log-transformed values for rifampicin in children and adolescents with tuberculosis, by patient characteristics.**

| Patient characteristics                       | Fixed-effects coefficient (95% CI) | Random effects for each model <sup>§</sup> |                        |                              |                        |      |                            | Obs. <sup>§§</sup> | Cond. R <sup>2</sup> |
|-----------------------------------------------|------------------------------------|--------------------------------------------|------------------------|------------------------------|------------------------|------|----------------------------|--------------------|----------------------|
|                                               |                                    | $\sigma^2$                                 | $\tau_{00}$<br>studies | $\tau_{11}$<br>studies*doses | $\rho_{01}$<br>studies | ICC  | N <sup>§§</sup><br>studies |                    |                      |
| Age, years <sup>†</sup>                       | 0.13 (0.08–0.18)***                | 0.50                                       | 0.13                   | 0.12                         | 0.16                   | 0.35 | 22                         | 1105               | 0.550                |
| Age                                           |                                    |                                            |                        |                              |                        |      |                            |                    |                      |
| <2 years                                      | -0.40 (-0.55–-0.25)***             | 0.49                                       | 0.13                   | 0.10                         | 0.03                   | 0.33 | 22                         | 1105               | 0.532                |
| 2–4 years                                     | -0.16 (-0.30–-0.02)*               |                                            |                        |                              |                        |      |                            |                    |                      |
| 5–9 years                                     | -0.07 (-0.19–0.06)                 |                                            |                        |                              |                        |      |                            |                    |                      |
| 10–14 years                                   | Ref.                               |                                            |                        |                              |                        |      |                            |                    |                      |
| 15–18 years                                   | 0.10 (-0.27–0.46)                  |                                            |                        |                              |                        |      |                            |                    |                      |
| Sex                                           |                                    |                                            |                        |                              |                        |      |                            |                    |                      |
| Female                                        | Ref.                               | 0.51                                       | 0.12                   | 0.11                         | 0.19                   | 0.34 | 22                         | 1105               | 0.518                |
| Male                                          | -0.00 (-0.08–0.09)                 |                                            |                        |                              |                        |      |                            |                    |                      |
| Weight-for-age Z-score (WFAZ) <sup>†</sup>    | 0.08 (0.03–0.14)**                 | 0.54                                       | 0.11                   | 0.12                         | 0.26                   | 0.34 | 22                         | 893                | 0.551                |
| Underweight                                   |                                    |                                            |                        |                              |                        |      |                            |                    |                      |
| No                                            | Ref.                               | 0.55                                       | 0.11                   | 0.12                         | 0.25                   | 0.33 | 22                         | 893                | 0.549                |
| Yes, moderate (-3≤WFAZ<-2)                    | 0.03 (-0.10–0.16)                  |                                            |                        |                              |                        |      |                            |                    |                      |
| Yes, severe (WFAZ<-3)                         | -0.17 (-0.32–-0.02)*               |                                            |                        |                              |                        |      |                            |                    |                      |
| Height-for-age Z-score (HFAZ) <sup>†</sup>    | 0.09 (0.05–0.14)***                | 0.50                                       | 0.11                   | 0.12                         | 0.18                   | 0.34 | 22                         | 1098               | 0.538                |
| Stunted                                       |                                    |                                            |                        |                              |                        |      |                            |                    |                      |
| No                                            | Ref.                               | 0.51                                       | 0.12                   | 0.12                         | 0.21                   | 0.34 | 22                         | 1098               | 0.537                |
| Yes, moderate (-3≤HFAZ<-2)                    | -0.15 (-0.26–-0.04)**              |                                            |                        |                              |                        |      |                            |                    |                      |
| Yes, severe (HFAZ<-3)                         | -0.16 (-0.27–-0.04)**              |                                            |                        |                              |                        |      |                            |                    |                      |
| Weight-for-height Z-score (WFHZ) <sup>†</sup> | 0.02 (-0.03–0.08)                  | 0.56                                       | 0.12                   | 0.16                         | 0.27                   | 0.39 | 22                         | 793                | 0.602                |
| Wasted                                        |                                    |                                            |                        |                              |                        |      |                            |                    |                      |
| No                                            | Ref.                               | 0.56                                       | 0.12                   | 0.16                         | 0.27                   | 0.39 | 22                         | 793                | 0.600                |
| Yes, moderate (-3≤WFHZ<-2)                    | -0.06 (-0.23–0.11)                 |                                            |                        |                              |                        |      |                            |                    |                      |
| Yes, severe (WFHZ<-3)                         | 0.05 (-0.18–0.28)                  |                                            |                        |                              |                        |      |                            |                    |                      |
| BMI-for-age Z-score (BFAZ) <sup>†</sup>       | 0.00 (-0.05–0.05)                  | 0.51                                       | 0.12                   | 0.11                         | 0.18                   | 0.34 | 22                         | 1097               | 0.517                |
| Low BMI                                       |                                    |                                            |                        |                              |                        |      |                            |                    |                      |
| No                                            | Ref.                               | 0.51                                       | 0.12                   | 0.12                         | 0.24                   | 0.34 | 22                         | 1097               | 0.524                |
| Yes, moderate (-3≤BFAZ<-2)                    | 0.14 (0.01–0.27)*                  |                                            |                        |                              |                        |      |                            |                    |                      |
| Yes, severe (BFAZ <-3)                        | -0.07 (-0.22–0.09)                 |                                            |                        |                              |                        |      |                            |                    |                      |
| Malnourished <sup>†</sup>                     |                                    |                                            |                        |                              |                        |      |                            |                    |                      |
| No                                            | Ref.                               | 0.51                                       | 0.11                   | 0.12                         | 0.17                   | 0.34 | 22                         | 1098               | 0.531                |
| Yes, moderate                                 | -0.06 (-0.16–0.05)                 |                                            |                        |                              |                        |      |                            |                    |                      |
| Yes, severe                                   | -0.17 (-0.28–-0.06)**              |                                            |                        |                              |                        |      |                            |                    |                      |
| Type of tuberculosis                          |                                    |                                            |                        |                              |                        |      |                            |                    |                      |
| Pulmonary                                     | Ref.                               | 0.48                                       | 0.14                   | 0.10                         | 0.19                   | 0.37 | 18                         | 961                | 0.526                |
| Extrapulmonary                                | 0.06 (-0.08–0.20)                  |                                            |                        |                              |                        |      |                            |                    |                      |
| Pulmonary + extrapulmonary                    | -0.03 (-0.20–0.14)                 |                                            |                        |                              |                        |      |                            |                    |                      |
| HIV status                                    |                                    |                                            |                        |                              |                        |      |                            |                    |                      |
| Negative                                      | Ref.                               | 0.51                                       | 0.10                   | 0.13                         | 0.19                   | 0.35 | 21                         | 1049               | 0.543                |
| Positive                                      | -0.26 (-0.40–-0.12)***             |                                            |                        |                              |                        |      |                            |                    |                      |
| Drug administration                           |                                    |                                            |                        |                              |                        |      |                            |                    |                      |
| Taken whole orally                            | Ref.                               | 0.44                                       | 0.04                   | n/a                          | n/a                    | 0.08 | 7                          | 377                | 0.380                |
| Crushed/dispersed/via NGT                     | -0.04 (-0.12–0.19)                 |                                            |                        |                              |                        |      |                            |                    |                      |
| Creatinine clearance, mL/min <sup>†,††</sup>  | 0.09 (0.01–0.17)*                  | 0.32                                       | 0.16                   | n/a                          | n/a                    | 0.34 | 12                         | 432                | 0.493                |
| Serum albumin, g/dL <sup>†</sup>              | 0.02 (-0.05–0.09)                  | 0.44                                       | 0.14                   | n/a                          | n/a                    | 0.25 | 12                         | 634                | 0.417                |
| Hypoalbuminemia                               |                                    |                                            |                        |                              |                        |      |                            |                    |                      |
| No, ≥3.5 g/dL                                 | Ref.                               | 0.44                                       | 0.15                   | n/a                          | n/a                    | 0.25 | 12                         | 634                | 0.414                |
| Yes, <3.5 g/dL                                | 0.03 (-0.12–0.19)                  |                                            |                        |                              |                        |      |                            |                    |                      |
| SLCO1B1 rs4149032                             |                                    |                                            |                        |                              |                        |      |                            |                    |                      |
| CC                                            | Ref.                               | 0.31                                       | 0.06                   | n/a                          | n/a                    | 0.16 | 2                          | 190                | 0.228                |
| CT                                            | -0.10 (-0.30–0.11)                 |                                            |                        |                              |                        |      |                            |                    |                      |
| TT                                            | -0.30 (-0.54–-0.05)*               |                                            |                        |                              |                        |      |                            |                    |                      |

Data are presented as fixed-effects coefficients (beta coefficients) and 95% confidence intervals (CI), unless stated otherwise: <sup>§</sup>mean or <sup>§§</sup>number. C<sub>max</sub>: maximum plasma concentration; BMI: body mass index; HIV: human immunodeficiency virus; NGT: nasogastric tube,  $\sigma^2$ : residual variance,  $\tau_{00}$ : random intercept variance,  $\tau_{11}$ : random slope variance,  $\rho_{01}$ : random slope-intercept correlation, ICC: intraclass correlation coefficient, N: number of included studies, conditional R<sup>2</sup>: the proportion of variance explained by both the fixed and random effects. Obs.: observations; Cond.: conditional. <sup>†</sup>All continuous variables were mean-centred by subtracting the mean from each data point, then standardized by dividing each point by the standard deviation. <sup>†</sup>Moderate malnutrition was defined as WFAZ or HFAZ ≥-3 but <-2 in children aged <5 years, and HFAZ or BFAZ ≥-3 but <-2 in children aged ≥5 years; and severe malnutrition was defined as WFAZ or HFAZ <-3 in children aged <5 years, and HFAZ or BFAZ <-3 in children aged ≥5 years. <sup>††</sup> Model for creatinine clearance was adjusted for drug dose and age. \*\*\*p<0.001, \*\*p<0.01, \*p<0.05, #p<0.1.

**Table E11. Linear mixed-effects models of dose-adjusted AUC<sub>0-24</sub> in log-transformed values for pyrazinamide in children and adolescents with tuberculosis, by patient characteristics.**

| Patient characteristics                       | Fixed-effects coefficient (95% CI) | Random effects for each model <sup>§</sup> |                        |                              |                        |      |                            | Obs. <sup>§§</sup> | Cond. R <sup>2</sup> |
|-----------------------------------------------|------------------------------------|--------------------------------------------|------------------------|------------------------------|------------------------|------|----------------------------|--------------------|----------------------|
|                                               |                                    | $\sigma^2$                                 | $\tau_{00}$<br>studies | $\tau_{11}$<br>studies*doses | $\rho_{01}$<br>studies | ICC  | N <sup>§§</sup><br>studies |                    |                      |
| Age, years <sup>†</sup>                       | 0.11 (0.07–0.14)***                | 0.22                                       | 0.04                   | 0.01                         | -0.23                  | 0.19 | 23                         | 962                | 0.290                |
| Age                                           |                                    |                                            |                        |                              |                        |      |                            |                    |                      |
| <2 years                                      | -0.28 (-0.38–-0.17)***             | 0.22                                       | 0.04                   | 0.01                         | -0.26                  | 0.19 | 23                         | 962                | 0.289                |
| 2–4 years                                     | -0.24 (-0.34–-0.14)***             |                                            |                        |                              |                        |      |                            |                    |                      |
| 5–9 years                                     | -0.13 (-0.22–-0.04)**              |                                            |                        |                              |                        |      |                            |                    |                      |
| 10–14 years                                   | Ref.                               |                                            |                        |                              |                        |      |                            |                    |                      |
| 15–18 years                                   | -0.003 (-0.28–0.27)                |                                            |                        |                              |                        |      |                            |                    |                      |
| Sex                                           |                                    |                                            |                        |                              |                        |      |                            |                    |                      |
| Female                                        | Ref.                               | 0.22                                       | 0.06                   | 0.02                         | -0.63                  | 0.24 | 23                         | 962                | 0.304                |
| Male                                          | -0.10 (-0.16–-0.04)**              |                                            |                        |                              |                        |      |                            |                    |                      |
| Weight-for-age Z-score (WFAZ) <sup>†</sup>    | 0.05 (0.02–0.09)**                 | 0.23                                       | 0.06                   | 0.01                         | -0.61                  | 0.24 | 23                         | 781                | 0.306                |
| Underweight                                   |                                    |                                            |                        |                              |                        |      |                            |                    |                      |
| No                                            | Ref.                               | 0.23                                       | 0.05                   | 0.01                         | -0.54                  | 0.22 | 23                         | 781                | 0.293                |
| Yes, moderate (-3≤WFAZ<-2)                    | 0.03 (-0.06–0.12)                  |                                            |                        |                              |                        |      |                            |                    |                      |
| Yes, severe (WFAZ<-3)                         | -0.10 (-0.19–-0.01)*               |                                            |                        |                              |                        |      |                            |                    |                      |
| Height-for-age Z-score (HFAZ) <sup>†</sup>    | 0.06 (0.02–0.10)**                 | 0.21                                       | 0.06                   | 0.02                         | -0.60                  | 0.25 | 21                         | 921                | 0.315                |
| Stunted                                       |                                    |                                            |                        |                              |                        |      |                            |                    |                      |
| No                                            | Ref.                               | 0.21                                       | 0.06                   | 0.02                         | -0.63                  | 0.26 | 21                         | 921                | 0.323                |
| Yes, moderate (-3≤HFAZ<-2)                    | -0.09 (-0.17–-0.02)*               |                                            |                        |                              |                        |      |                            |                    |                      |
| Yes, severe (HFAZ<-3)                         | -0.16 (-0.24–-0.07)***             |                                            |                        |                              |                        |      |                            |                    |                      |
| Weight-for-height Z-score (WFHZ) <sup>†</sup> | 0.02 (-0.03–0.07)                  | 0.22                                       | 0.05                   | 0.01                         | -0.18                  | 0.20 | 21                         | 665                | 0.274                |
| Wasted                                        |                                    |                                            |                        |                              |                        |      |                            |                    |                      |
| No                                            | Ref.                               | 0.22                                       | 0.05                   | 0.01                         | -0.29                  | 0.19 | 21                         | 665                | 0.270                |
| Yes, moderate (-3≤WFHZ<-2)                    | -0.11 (-0.22–-0.01) <sup>#</sup>   |                                            |                        |                              |                        |      |                            |                    |                      |
| Yes, severe (WFHZ<-3)                         | -0.05 (-0.18–0.08)                 |                                            |                        |                              |                        |      |                            |                    |                      |
| BMI-for-age Z-score (BFAZ) <sup>†</sup>       | -0.04 (-0.10–0.03)                 | 0.22                                       | 0.06                   | 0.02                         | -0.60                  | 0.25 | 21                         | 921                | 0.302                |
| Low BMI                                       |                                    |                                            |                        |                              |                        |      |                            |                    |                      |
| No                                            | Ref.                               | 0.22                                       | 0.06                   | 0.02                         | -0.66                  | 0.25 | 21                         | 921                | 0.304                |
| Yes, moderate (-3≤BFAZ<-2)                    | -0.02 (-0.11–0.08)                 |                                            |                        |                              |                        |      |                            |                    |                      |
| Yes, severe (BFAZ <-3)                        | 0.00 (-0.10–0.10)                  |                                            |                        |                              |                        |      |                            |                    |                      |
| Malnourished <sup>†</sup>                     |                                    |                                            |                        |                              |                        |      |                            |                    |                      |
| No                                            | Ref.                               | 0.22                                       | 0.06                   | 0.02                         | -0.65                  | 0.25 | 22                         | 929                | 0.304                |
| Yes, moderate                                 | -0.04 (-0.12–0.04)                 |                                            |                        |                              |                        |      |                            |                    |                      |
| Yes, severe                                   | -0.13 (-0.21–-0.05)**              |                                            |                        |                              |                        |      |                            |                    |                      |
| Type of tuberculosis                          |                                    |                                            |                        |                              |                        |      |                            |                    |                      |
| Pulmonary                                     | Ref.                               | 0.22                                       | 0.07                   | 0.01                         | -0.79                  | 0.25 | 18                         | 834                | 0.272                |
| Extrapulmonary                                | 0.06 (-0.03–0.15)                  |                                            |                        |                              |                        |      |                            |                    |                      |
| Pulmonary + extrapulmonary                    | 0.05 (-0.10–0.19)                  |                                            |                        |                              |                        |      |                            |                    |                      |
| HIV status                                    |                                    |                                            |                        |                              |                        |      |                            |                    |                      |
| Negative                                      | Ref.                               | 0.23                                       | 0.07                   | 0.02                         | -0.60                  | 0.28 | 20                         | 882                | 0.346                |
| Positive                                      | -0.21 (-0.30–-0.11)***             |                                            |                        |                              |                        |      |                            |                    |                      |
| Drug administration                           |                                    |                                            |                        |                              |                        |      |                            |                    |                      |
| Taken whole orally                            | Ref.                               | 0.16                                       | 0.03                   | 0.01                         | 0.95                   | 0.22 | 4                          | 255                | 0.325                |
| Crushed/dispersed/via NGT                     | -0.02 (-0.13–0.09)                 |                                            |                        |                              |                        |      |                            |                    |                      |
| Creatinine clearance, mL/min <sup>†,††</sup>  | 0.01 (-0.05–0.07)                  | 0.22                                       | 0.03                   | -                            | -                      | 0.13 | 12                         | 323                | 0.204                |
| Serum albumin, g/dL <sup>†</sup>              | -0.02 (-0.07–0.03)                 | 0.23                                       | 0.07                   | -                            | -                      | 0.23 | 11                         | 577                | 0.277                |
| Hypoalbuminemia                               |                                    |                                            |                        |                              |                        |      |                            |                    |                      |
| No, ≥3.5 g/dL                                 | Ref.                               | 0.22                                       | 0.10                   | 0.04                         | -0.80                  | 0.34 | 11                         | 577                | 0.360                |
| Yes, <3.5 g/dL                                | -0.03 (-0.13–0.08)                 |                                            |                        |                              |                        |      |                            |                    |                      |

Data are presented as fixed-effects coefficients (beta coefficients) and 95% confidence intervals (CI), unless stated otherwise: <sup>§</sup>mean or <sup>§§</sup>number. AUC<sub>0-24</sub>: area under the plasma concentration-time curve from 0 to 24 hours after dosing; BMI: body mass index; HIV: human immunodeficiency virus; NGT: nasogastric tube,  $\sigma^2$ : residual variance,  $\tau_{00}$ : random intercept variance,  $\tau_{11}$ : random slope variance,  $\rho_{01}$ : random slope-intercept correlation, ICC: intraclass correlation coefficient, N: number of included studies, conditional R<sup>2</sup>: the proportion of variance explained by both the fixed and random effects. Obs.: observations; Cond.: conditional. <sup>†</sup>All continuous variables were mean-centred by subtracting the mean from each data point, then standardized by dividing each point by the standard deviation. <sup>†</sup>Moderate malnutrition was defined as WFAZ or HFAZ ≥-3 but <-2 in children aged <5 years, and HFAZ or BFAZ ≥-3 but <-2 in children aged ≥5 years; and severe malnutrition was defined as WFAZ or HFAZ <-3 in children aged <5 years, and HFAZ or BFAZ <-3 in children aged ≥5 years. <sup>††</sup> Model for creatinine clearance was adjusted for drug dose and age. \*\*\*p<0.001, \*\*p<0.01, \*p<0.05, <sup>#</sup>p<0.1.

**Table E12. Linear mixed-effects models of dose-adjusted C<sub>max</sub> in log-transformed values for pyrazinamide in children and adolescents with tuberculosis, by patient characteristics.**

| Patient characteristics                       | Fixed-effects coefficient (95% CI) | Random effects for each model |             |               |             |      |                | Obs. <sup>§§</sup> | Cond. R <sup>2</sup> |
|-----------------------------------------------|------------------------------------|-------------------------------|-------------|---------------|-------------|------|----------------|--------------------|----------------------|
|                                               |                                    | $\sigma^2$                    | $\tau_{00}$ | $\tau_{11}$   | $\rho_{01}$ | ICC  | N <sup>§</sup> |                    |                      |
|                                               |                                    |                               | studies     | studies*doses | studies     |      | studies        |                    |                      |
| Age, years <sup>†</sup>                       | 0.07 (0.03–0.10)***                | 0.20                          | 0.03        | 0.01          | -0.21       | 0.17 | 23             | 1021               | 0.269                |
| Age                                           |                                    |                               |             |               |             |      |                |                    |                      |
| <2 years                                      | -0.19 (-0.28–-0.09)***             | 0.20                          | 0.03        | 0.01          | -0.18       | 0.17 | 23             | 1021               | 0.270                |
| 2–4 years                                     | -0.16 (-0.25–-0.06)***             |                               |             |               |             |      |                |                    |                      |
| 5–9 years                                     | -0.10 (-0.18–-0.02)*               |                               |             |               |             |      |                |                    |                      |
| 10–14 years                                   | Ref.                               |                               |             |               |             |      |                |                    |                      |
| 15–18 years                                   | -0.01 (-0.26–0.23)                 |                               |             |               |             |      |                |                    |                      |
| Sex                                           |                                    |                               |             |               |             |      |                |                    |                      |
| Female                                        | Ref.                               | 0.20                          | 0.04        | 0.01          | -0.43       | 0.20 | 23             | 1021               | 0.279                |
| Male                                          | -0.07 (-0.12–-0.01)*               |                               |             |               |             |      |                |                    |                      |
| Weight-for-age Z-score (WFAZ) <sup>‡</sup>    | 0.05 (0.02–0.09)**                 | 0.21                          | 0.04        | 0.01          | -0.25       | 0.19 | 23             | 827                | 0.282                |
| Underweight                                   |                                    |                               |             |               |             |      |                |                    |                      |
| No                                            | Ref.                               | 0.21                          | 0.04        | 0.01          | -0.21       | 0.18 | 23             | 827                | 0.274                |
| Yes, moderate ( $-3 \leq \text{WFAZ} < -2$ )  | 0.03 (-0.06–0.11)                  |                               |             |               |             |      |                |                    |                      |
| Yes, severe ( $\text{WFAZ} < -3$ )            | -0.14 (-0.22–-0.05)**              |                               |             |               |             |      |                |                    |                      |
| Height-for-age Z-score (HFAZ) <sup>‡</sup>    | 0.05 (0.01–0.09)**                 | 0.19                          | 0.04        | 0.01          | -0.26       | 0.19 | 21             | 974                | 0.274                |
| Stunted                                       |                                    |                               |             |               |             |      |                |                    |                      |
| No                                            | Ref.                               | 0.19                          | 0.04        | 0.01          | -0.34       | 0.20 | 21             | 974                | 0.285                |
| Yes, moderate ( $-3 \leq \text{HFAZ} < -2$ )  | -0.07 (-0.14–-0.001) <sup>#</sup>  |                               |             |               |             |      |                |                    |                      |
| Yes, severe ( $\text{HFAZ} < -3$ )            | -0.14 (-0.21–-0.06)***             |                               |             |               |             |      |                |                    |                      |
| Weight-for-height Z-score (WFHZ) <sup>‡</sup> | -0.04 (-0.08–0.003) <sup>#</sup>   | 0.20                          | 0.04        | 0.01          | 0.34        | 0.21 | 21             | 694                | 0.329                |
| Wasted                                        |                                    |                               |             |               |             |      |                |                    |                      |
| No                                            | Ref.                               | 0.20                          | 0.05        | 0.01          | 0.08        | 0.23 | 21             | 694                | 0.328                |
| Yes, moderate ( $-3 \leq \text{WFHZ} < -2$ )  | -0.13 (-0.23–-0.02)*               |                               |             |               |             |      |                |                    |                      |
| Yes, severe ( $\text{WFHZ} < -3$ )            | -0.05 (-0.17–0.08)                 |                               |             |               |             |      |                |                    |                      |
| BMI-for-age Z-score (BFAZ) <sup>‡</sup>       | 0.00 (-0.05–0.05)                  | 0.19                          | 0.04        | 0.01          | -0.39       | 0.21 | 21             | 974                | 0.279                |
| Low BMI                                       |                                    |                               |             |               |             |      |                |                    |                      |
| No                                            | Ref.                               | 0.19                          | 0.04        | 0.01          | -0.40       | 0.21 | 21             | 974                | 0.276                |
| Yes, moderate ( $-3 \leq \text{BFAZ} < -2$ )  | 0.002 (-0.08–0.09)                 |                               |             |               |             |      |                |                    |                      |
| Yes, severe ( $\text{BFAZ} < -3$ )            | -0.07 (-0.16–0.03)                 |                               |             |               |             |      |                |                    |                      |
| Malnourished <sup>††</sup>                    |                                    |                               |             |               |             |      |                |                    |                      |
| No                                            | Ref.                               | 0.20                          | 0.04        | 0.01          | -0.45       | 0.20 | 22             | 987                | 0.286                |
| Yes, moderate                                 | -0.02 (-0.09–0.05)                 |                               |             |               |             |      |                |                    |                      |
| Yes, severe                                   | -0.13 (-0.20–-0.06)***             |                               |             |               |             |      |                |                    |                      |
| Type of tuberculosis                          |                                    |                               |             |               |             |      |                |                    |                      |
| Pulmonary                                     | Ref.                               | 0.19                          | 0.04        | 0.01          | -0.58       | 0.19 | 18             | 882                | 0.231                |
| Extrapulmonary                                | 0.05 (-0.03–0.14)                  |                               |             |               |             |      |                |                    |                      |
| Pulmonary + extrapulmonary                    | 0.03 (-0.10–0.17)                  |                               |             |               |             |      |                |                    |                      |
| HIV status                                    |                                    |                               |             |               |             |      |                |                    |                      |
| Negative                                      | Ref.                               | 0.17                          | 0.04        | 0.01          | -0.25       | 0.25 | 20             | 939                | 0.340                |
| Positive                                      | -0.14 (-0.22–-0.06)**              |                               |             |               |             |      |                |                    |                      |
| Drug administration                           |                                    |                               |             |               |             |      |                |                    |                      |
| Taken whole orally                            | Ref.                               | 0.09                          | 0.02        | 0.01          | 0.14        | 0.23 | 4              | 258                | 0.363                |
| Crushed/dispersed/via NGT                     | 0.05 (-0.04–0.13)                  |                               |             |               |             |      |                |                    |                      |
| Creatinine clearance, mL/min <sup>‡</sup>     | 0.02 (-0.03–0.08)                  | 0.18                          | 0.04        | -             | -           | 0.17 | 12             | 337                | 0.214                |
| Serum albumin, g/dL <sup>‡††</sup>            | -0.02 (-0.06–0.02)                 | 0.13                          | 0.05        | -             | -           | 0.25 | 11             | 596                | 0.316                |
| Hypoalbuminemia                               |                                    |                               |             |               |             |      |                |                    |                      |
| No, $\geq 3.5$ g/dL                           | Ref.                               | 0.13                          | 0.05        | 0.01          | -0.59       | 0.29 | 11             | 596                | 0.344                |
| Yes, $< 3.5$ g/dL                             | -0.003 (-0.08–0.08)                |                               |             |               |             |      |                |                    |                      |

Data are presented as fixed-effects coefficients (beta coefficients) and 95% confidence intervals (CI), unless stated otherwise: <sup>§</sup>mean or <sup>§§</sup>number. C<sub>max</sub>: maximum plasma concentration; BMI: body mass index; HIV: human immunodeficiency virus; NGT: nasogastric tube,  $\sigma^2$ : residual variance,  $\tau_{00}$ : random intercept variance,  $\tau_{11}$ : random slope variance,  $\rho_{01}$ : random slope-intercept correlation, ICC: intraclass correlation coefficient, N: number of included studies, conditional R<sup>2</sup>: the proportion of variance explained by both the fixed and random effects. Obs.: observations; Cond.: conditional. <sup>†</sup>All continuous variables were mean-centred by subtracting the mean from each data point, then standardized by dividing each point by the standard deviation. <sup>‡</sup>Moderate malnutrition was defined as WFAZ or HFAZ  $\geq -3$  but  $< -2$  in children aged  $< 5$  years, and HFAZ or BFAZ  $\geq -3$  but  $< -2$  in children aged  $\geq 5$  years; and severe malnutrition was defined as WFAZ or HFAZ  $< -3$  in children aged  $< 5$  years, and HFAZ or BFAZ  $< -3$  in children aged  $\geq 5$  years. <sup>††</sup> Model for creatinine clearance was adjusted for drug dose and age. \*\*\*p<0.001, \*\*p<0.01, \*p<0.05, <sup>#</sup>p<0.1.

**Table E13. Linear mixed-effects models of dose-adjusted AUC<sub>0-24</sub> in log-transformed values for ethambutol in children and adolescents with tuberculosis, by patient characteristics.**

| Patient characteristics                       | Fixed-effects coefficient (95% CI) | Random effects for each model |                     |      |                        | Obs. <sup>§§</sup> | Cond. R <sup>2</sup> |
|-----------------------------------------------|------------------------------------|-------------------------------|---------------------|------|------------------------|--------------------|----------------------|
|                                               |                                    | $\sigma^2$                    | $\tau_{00}$ studies | ICC  | N <sup>§</sup> studies |                    |                      |
| Age, years <sup>†</sup>                       | 0.20 (0.13–0.27) <sup>***</sup>    | 0.45                          | 0.15                | 0.25 | 11                     | 410                | 0.315                |
| Age                                           |                                    |                               |                     |      |                        |                    |                      |
| <2 years                                      | -0.52 (-0.74–-0.30) <sup>***</sup> | 0.45                          | 0.14                | 0.24 | 11                     | 410                | 0.305                |
| 2-4 years                                     | -0.33 (-0.54–-0.13) <sup>**</sup>  |                               |                     |      |                        |                    |                      |
| 5-9 years                                     | -0.18 (-0.37–0.01) <sup>#</sup>    |                               |                     |      |                        |                    |                      |
| 10-14 years                                   | Ref.                               |                               |                     |      |                        |                    |                      |
| 15-18 years                                   | 0.35 (-0.24–0.94)                  |                               |                     |      |                        |                    |                      |
| Sex                                           |                                    |                               |                     |      |                        |                    |                      |
| Female                                        | Ref.                               | 0.49                          | 0.11                | 0.18 | 11                     | 410                | 0.200                |
| Male                                          | -0.03 (-0.16–0.11)                 |                               |                     |      |                        |                    |                      |
| Weight-for-age Z-score (WFAZ) <sup>†</sup>    | 0.08 (0.003–0.16) <sup>*</sup>     | 0.45                          | 0.03                | 0.07 | 11                     | 321                | 0.121                |
| Underweight                                   |                                    |                               |                     |      |                        |                    |                      |
| No                                            | Ref.                               | 0.45                          | 0.04                | 0.08 | 11                     | 321                | 0.125                |
| Yes, moderate (-3≤WFAZ<-2)                    | -0.07 (-0.25–0.12)                 |                               |                     |      |                        |                    |                      |
| Yes, severe (WFAZ<-3)                         | -0.13 (-0.33–0.06)                 |                               |                     |      |                        |                    |                      |
| Height-for-age Z-score (HFAZ) <sup>†</sup>    | 0.09 (-0.01–0.19) <sup>#</sup>     | 0.47                          | 0.16                | 0.25 | 10                     | 390                | 0.278                |
| Stunted                                       |                                    |                               |                     |      |                        |                    |                      |
| No                                            | Ref.                               | 0.47                          | 0.12                | 0.21 | 10                     | 390                | 0.238                |
| Yes, moderate (-3≤HFAZ<-2)                    | -0.11 (-0.29–0.07)                 |                               |                     |      |                        |                    |                      |
| Yes, severe (HFAZ<-3)                         | -0.19 (-0.37–-0.02) <sup>*</sup>   |                               |                     |      |                        |                    |                      |
| Weight-for-height Z-score (WFHZ) <sup>†</sup> | 0.06 (-0.04–0.17)                  | 0.40                          | 0.09                | 0.18 | 10                     | 267                | 0.215                |
| Wasted                                        |                                    |                               |                     |      |                        |                    |                      |
| No                                            | Ref.                               | 0.40                          | 0.09                | 0.18 | 10                     | 267                | 0.214                |
| Yes, moderate (-3≤WFHZ<-2)                    | -0.004 (-0.25–0.24)                |                               |                     |      |                        |                    |                      |
| Yes, severe (WFHZ<-3)                         | -0.10 (-0.39–0.18)                 |                               |                     |      |                        |                    |                      |
| BMI-for-age Z-score (BFAZ) <sup>†</sup>       | -0.01 (-0.15–0.14)                 | 0.47                          | 0.14                | 0.23 | 10                     | 390                | 0.249                |
| Low BMI                                       |                                    |                               |                     |      |                        |                    |                      |
| No                                            | Ref.                               | 0.48                          | 0.13                | 0.21 | 10                     | 390                | 0.229                |
| Yes, moderate (-3≤BFAZ<-2)                    | -0.03 (-0.22–0.16)                 |                               |                     |      |                        |                    |                      |
| Yes, severe (BFAZ <-3)                        | 0.04 (-0.22–0.30)                  |                               |                     |      |                        |                    |                      |
| Malnourished <sup>†</sup>                     |                                    |                               |                     |      |                        |                    |                      |
| No                                            | Ref.                               | 0.48                          | 0.11                | 0.19 | 11                     | 392                | 0.221                |
| Yes, moderate                                 | -0.10 (-0.27–0.08)                 |                               |                     |      |                        |                    |                      |
| Yes, severe                                   | -0.19 (-0.36–-0.01) <sup>*</sup>   |                               |                     |      |                        |                    |                      |
| Type of tuberculosis                          |                                    |                               |                     |      |                        |                    |                      |
| Pulmonary                                     | Ref.                               | 0.48                          | 0.11                | 0.19 | 10                     | 392                | 0.223                |
| Extrapulmonary                                | 0.24 (0.04–0.44) <sup>*</sup>      |                               |                     |      |                        |                    |                      |
| Pulmonary + extrapulmonary                    | 0.22 (-0.07–0.50)                  |                               |                     |      |                        |                    |                      |
| HIV status                                    |                                    |                               |                     |      |                        |                    |                      |
| Negative                                      | Ref.                               | 0.48                          | 0.03                | 0.07 | 11                     | 391                | 0.143                |
| Positive                                      | -0.39 (-0.56–-0.23) <sup>***</sup> |                               |                     |      |                        |                    |                      |
| Drug administration                           |                                    |                               |                     |      |                        |                    |                      |
| Taken whole orally                            | Ref.                               | 0.25                          | 0.00                | -    | 2                      | 101                | 0.059 <sup>‡</sup>   |
| Crushed/dispersed/via NGT                     | -0.15 (-0.35–0.05)                 |                               |                     |      |                        |                    |                      |
| Creatinine clearance, mL/min <sup>†,††</sup>  | 0.03 (-0.13–0.07)                  | 0.31                          | 0.04                | 0.12 | 7                      | 166                | 0.291                |
| Serum albumin, g/dL <sup>†</sup>              | -0.09 (-0.18–0.01) <sup>#</sup>    | 0.45                          | 0.28                | 0.38 | 4                      | 221                | 0.409                |
| Hypoalbuminemia                               |                                    |                               |                     |      |                        |                    |                      |
| No, ≥3.5 g/dL                                 | Ref.                               | 0.45                          | 0.26                | 0.36 | 4                      | 221                | 0.386                |
| Yes, <3.5 g/dL                                | 0.11 (-0.12–0.33)                  |                               |                     |      |                        |                    |                      |

Data are presented as fixed-effects coefficients (beta coefficients) and 95% confidence intervals (CI), unless stated otherwise: <sup>§</sup>mean or <sup>§§</sup>number. AUC<sub>0-24</sub>: area under the plasma concentration-time curve from 0 to 24 hours after dosing; BMI: body mass index; HIV: human immunodeficiency virus; NGT: nasogastric tube,  $\sigma^2$ : residual variance,  $\tau_{00}$ : random intercept variance, ICC: intraclass correlation coefficient, N: number of included studies, conditional R<sup>2</sup>: the proportion of variance explained by both the fixed and random effects. Obs.: observations; Cond.: conditional. <sup>†</sup>All continuous variables were mean-centred by subtracting the mean from each data point, then standardized by dividing each point by the standard deviation. <sup>‡</sup>Moderate malnutrition was defined as WFAZ or HFAZ ≥-3 but <-2 in children aged <5 years, and HFAZ or BFAZ ≥-3 but <-2 in children aged ≥5 years; and severe malnutrition was defined as WFAZ or HFAZ <-3 in children aged <5 years, and HFAZ or BFAZ <-3 in children aged ≥5 years. <sup>††</sup> Model for creatinine clearance was adjusted for drug dose and age. <sup>‡</sup>Marginal R<sup>2</sup>. <sup>\*\*\*</sup>p<0.001, <sup>\*\*</sup>p<0.01, <sup>\*</sup>p<0.05, <sup>#</sup>p<0.1.

**Table E14. Linear mixed-effects models of dose-adjusted  $C_{\max}$  in log-transformed values for ethambutol in children and adolescents with tuberculosis, by patient characteristics.**

| Patient characteristics                       | Fixed-effects coefficient (95% CI) | Random effects for each model |                     |      |                        | Obs. <sup>§§</sup> | Cond. R <sup>2</sup> |
|-----------------------------------------------|------------------------------------|-------------------------------|---------------------|------|------------------------|--------------------|----------------------|
|                                               |                                    | $\sigma^2$                    | $\tau_{00}$ studies | ICC  | N <sup>§</sup> studies |                    |                      |
| Age, years <sup>§</sup>                       | 0.22 (0.15–0.29) <sup>***</sup>    | 0.54                          | 0.08                | 0.13 | 11                     | 483                | 0.204                |
| Age                                           |                                    |                               |                     |      |                        |                    |                      |
| <2 years                                      | -0.62 (-0.84–-0.40) <sup>***</sup> | 0.53                          | 0.09                | 0.14 | 11                     | 467                | 0.229                |
| 2-4 years                                     | -0.29 (-0.50–-0.09) <sup>**</sup>  |                               |                     |      |                        |                    |                      |
| 5-9 years                                     | -0.10 (-0.29–0.08)                 |                               |                     |      |                        |                    |                      |
| 10-14 years                                   | Ref.                               |                               |                     |      |                        |                    |                      |
| 15-18 years                                   | 0.18 (-0.44–0.79)                  |                               |                     |      |                        |                    |                      |
| Sex                                           |                                    |                               |                     |      |                        |                    |                      |
| Female                                        | Ref.                               | 0.58                          | 0.06                | 0.09 | 11                     | 483                | 0.104                |
| Male                                          | -0.04 (-0.18–0.10)                 |                               |                     |      |                        |                    |                      |
| Weight-for-age Z-score (WFAZ) <sup>§</sup>    | 0.09 (0.01–0.18) <sup>*</sup>      | 0.58                          | 0.06                | 0.09 | 11                     | 371                | 0.125                |
| Underweight                                   |                                    |                               |                     |      |                        |                    |                      |
| No                                            | Ref.                               | 0.59                          | 0.06                | 0.10 | 11                     | 371                | 0.122                |
| Yes, moderate ( $-3 \leq \text{WFAZ} < -2$ )  | 0.01 (-0.18–0.21)                  |                               |                     |      |                        |                    |                      |
| Yes, severe (WFAZ $< -3$ )                    | -0.11 (-0.32–0.10)                 |                               |                     |      |                        |                    |                      |
| Height-for-age Z-score (HFAZ) <sup>§</sup>    | 0.09 (-0.005–0.18) <sup>#</sup>    | 0.57                          | 0.07                | 0.11 | 10                     | 459                | 0.129                |
| Stunted                                       |                                    |                               |                     |      |                        |                    |                      |
| No                                            | Ref.                               | 0.58                          | 0.06                | 0.09 | 10                     | 459                | 0.112                |
| Yes, moderate ( $-3 \leq \text{HFAZ} < -2$ )  | -0.07 (-0.26–0.11)                 |                               |                     |      |                        |                    |                      |
| Yes, severe (HFAZ $< -3$ )                    | -0.20 (-0.38–-0.03) <sup>*</sup>   |                               |                     |      |                        |                    |                      |
| Weight-for-height Z-score (WFHZ) <sup>§</sup> | 0.08 (-0.03–0.18)                  | 0.54                          | 0.09                | 0.15 | 10                     | 304                | 0.172                |
| Wasted                                        |                                    |                               |                     |      |                        |                    |                      |
| No                                            | Ref.                               | 0.54                          | 0.09                | 0.14 | 10                     | 304                | 0.161                |
| Yes, moderate ( $-3 \leq \text{WFHZ} < -2$ )  | -0.16 (-0.42–0.09)                 |                               |                     |      |                        |                    |                      |
| Yes, severe (WFHZ $< -3$ )                    | -0.20 (-0.50–0.10)                 |                               |                     |      |                        |                    |                      |
| BMI-for-age Z-score (BFAZ) <sup>§</sup>       | -0.03 (-0.14–0.09)                 | 0.58                          | 0.07                | 0.11 | 10                     | 459                | 0.123                |
| Low BMI                                       |                                    |                               |                     |      |                        |                    |                      |
| No                                            | Ref.                               | 0.57                          | 0.06                | 0.09 | 10                     | 459                | 0.113                |
| Yes, moderate ( $-3 \leq \text{BFAZ} < -2$ )  | -0.22 (-0.40–-0.03) <sup>*</sup>   |                               |                     |      |                        |                    |                      |
| Yes, severe (BFAZ $< -3$ )                    | -0.10 (-0.34–0.15)                 |                               |                     |      |                        |                    |                      |
| Malnourished <sup>†</sup>                     |                                    |                               |                     |      |                        |                    |                      |
| No                                            | Ref.                               | 0.58                          | 0.05                | 0.09 | 11                     | 461                | 0.109                |
| Yes, moderate                                 | -0.10 (-0.28–0.07)                 |                               |                     |      |                        |                    |                      |
| Yes, severe                                   | -0.20 (-0.38–-0.03) <sup>*</sup>   |                               |                     |      |                        |                    |                      |
| Type of tuberculosis                          |                                    |                               |                     |      |                        |                    |                      |
| Pulmonary                                     | Ref.                               | 0.57                          | 0.07                | 0.11 | 10                     | 459                | 0.113                |
| Extrapulmonary                                | 0.28 (0.07–0.49) <sup>*</sup>      |                               |                     |      |                        |                    |                      |
| Pulmonary + extrapulmonary                    | 0.29 (-0.02–0.60) <sup>#</sup>     |                               |                     |      |                        |                    |                      |
| HIV status                                    |                                    |                               |                     |      |                        |                    |                      |
| Negative                                      | Ref.                               | 0.58                          | 0.04                | 0.06 | 11                     | 455                | 0.101                |
| Positive                                      | -0.33 (-0.51–-0.15) <sup>***</sup> |                               |                     |      |                        |                    |                      |
| Drug administration                           |                                    |                               |                     |      |                        |                    |                      |
| Taken whole orally                            | Ref.                               | 0.31                          | 0.00                | -    | 2                      | 101                | 0.052 <sup>‡</sup>   |
| Crushed/dispersed/via NGT                     | -0.19 (-0.41–0.04)                 |                               |                     |      |                        |                    |                      |
| Creatinine clearance, mL/min <sup>§,††</sup>  | 0.04 (-0.06–0.15)                  | 0.38                          | 0.03                | 0.06 | 7                      | 174                | 0.234                |
| Serum albumin, g/dL <sup>§</sup>              | -0.10 (-0.20–-0.004) <sup>*</sup>  | 0.57                          | 0.16                | 0.22 | 4                      | 249                | 0.252                |
| Hypoalbuminemia                               |                                    |                               |                     |      |                        |                    |                      |
| No, $\geq 3.5$ g/dL                           | Ref.                               | 0.58                          | 0.16                | 0.21 | 4                      | 249                | 0.240                |
| Yes, $< 3.5$ g/dL                             | 0.19 (-0.07–0.44)                  |                               |                     |      |                        |                    |                      |

Data are presented as fixed-effects coefficients (beta coefficients) and 95% confidence intervals (CI), unless stated otherwise: <sup>§</sup>mean or <sup>§§</sup>number.  $C_{\max}$ : maximum plasma concentration; BMI: body mass index; HIV: human immunodeficiency virus; NGT: nasogastric tube,  $\sigma^2$ : residual variance,  $\tau_{00}$ : random intercept variance, ICC: intraclass correlation coefficient, N: number of included studies, conditional R<sup>2</sup>: the proportion of variance explained by both the fixed and random effects. Obs.: observations; Cond.: conditional. <sup>\*</sup>All continuous variables were mean-centred by subtracting the mean from each data point, then standardized by dividing each point by the standard deviation. <sup>†</sup>Moderate malnutrition was defined as WFAZ or HFAZ  $\geq -3$  but  $< -2$  in children aged  $< 5$  years, and HFAZ or BFAZ  $\geq -3$  but  $< -2$  in children aged  $\geq 5$  years; and severe malnutrition was defined as WFAZ or HFAZ  $< -3$  in children aged  $< 5$  years, and HFAZ or BFAZ  $< -3$  in children aged  $\geq 5$  years. <sup>††</sup> Model for creatinine clearance was adjusted for drug dose and age. <sup>‡</sup>Marginal R<sup>2</sup>. <sup>\*\*\*</sup>p<0.001, <sup>\*\*</sup>p<0.01, <sup>\*</sup>p<0.05, <sup>#</sup>p<0.1.

**Table E15. Multivariate linear mixed-effects analyses of factors associated with log-transformed AUC<sub>0-24</sub> values for first-line antituberculosis drugs in children under 5 years of age with tuberculosis.**

|                                                             | Fixed-effects coefficient (95% CI) |                          |                          |                                |
|-------------------------------------------------------------|------------------------------------|--------------------------|--------------------------|--------------------------------|
|                                                             | Isoniazid                          | Rifampicin               | Pyrazinamide             | Ethambutol                     |
| (Intercept)                                                 | 2.50 (2.30–2.70)***                | 3.40 (3.16–3.63)***      | 5.77 (5.64–5.90)***      | 2.26 (1.94–2.59)***            |
| Dose, mg/kg <sup>¶</sup>                                    | 0.39 (0.29–0.48)***                | 0.35 (0.27–0.43)***      | 0.18 (0.11–0.24)***      | 0.16 (0.06–0.26)***            |
| Age                                                         |                                    |                          |                          |                                |
| <2 years                                                    | -0.22 (-0.33–-0.11)***             | -0.16 (-0.29–-0.03)*     | -0.05 (-0.14–0.04)       | 0.23 (-0.04–0.50) <sup>#</sup> |
| 2–4 years                                                   | Ref.                               | Ref.                     | Ref.                     | Ref.                           |
| Sex                                                         |                                    |                          |                          |                                |
| Female                                                      | Ref.                               | Ref.                     | Ref.                     | Ref.                           |
| Male                                                        | 0.02 (-0.08–0.13)                  | -0.004 (-0.13–0.12)      | -0.10 (-0.19–-0.02)*     | 0.01 (-0.17–0.20)              |
| Malnourished <sup>§§</sup>                                  |                                    |                          |                          |                                |
| No                                                          | Ref.                               | Ref.                     | Ref.                     | Ref.                           |
| Yes, moderate                                               | -0.16 (-0.30–-0.03)*               | -0.07 (-0.22–0.08)       | -0.05 (-0.16–0.06)       | -0.10 (-0.34–0.14)             |
| Yes, severe                                                 | -0.11 (-0.24–0.01) <sup>#</sup>    | -0.07 (-0.23–0.10)       | -0.05 (-0.15–0.06)       | -0.06 (-0.28–0.16)             |
| Unknown                                                     | 0.13 (-0.22–0.48)                  | -0.08 (-1.11–1.95)       | 0.13 (-0.24–0.49)        | -0.02 (-0.66–0.62)             |
| HIV status                                                  |                                    |                          |                          |                                |
| Negative                                                    | Ref.                               | Ref.                     | Ref.                     | Ref.                           |
| Positive                                                    | -0.18 (-0.32–-0.04)*               | -0.22 (-0.40–-0.03)*     | -0.26 (-0.38–-0.14)***   | -0.44 (-0.66–-0.23)***         |
| Unknown                                                     | 0.05 (-0.26–0.35)                  | -0.22 (-0.61–0.17)       | 0.02 (-0.22–0.26)        | -0.11 (-0.47–0.24)             |
| Acetylator status, t <sub>1/2</sub> phenotype <sup>¶¶</sup> |                                    |                          |                          |                                |
| Slow                                                        | 0.67 (0.55–0.78)***                | n/a                      | n/a                      | n/a                            |
| Intermediate                                                | Ref.                               | n/a                      | n/a                      | n/a                            |
| Rapid                                                       | -0.46 (-0.62–-0.30)***             | n/a                      | n/a                      | n/a                            |
| Unknown                                                     | 0.30 (0.00–0.61)*                  | n/a                      | n/a                      | n/a                            |
| Random effects                                              |                                    |                          |                          |                                |
| σ <sup>2</sup>                                              | 0.36 (0.60) <sup>§</sup>           | 0.48 (0.69) <sup>§</sup> | 0.19 (0.44) <sup>§</sup> | 0.37 (0.61) <sup>§</sup>       |
| τ <sub>00</sub> studies                                     | 0.10 (0.31) <sup>§</sup>           | 0.19 (0.43) <sup>§</sup> | 0.03 (0.19) <sup>§</sup> | 0.01 (0.05) <sup>§</sup>       |
| τ <sub>11</sub> studies*doses                               | 0.01 (0.12) <sup>§</sup>           | n/a                      | 0.01 (0.08) <sup>§</sup> | n/a                            |
| ρ <sub>01</sub> studies                                     | -0.64                              | n/a                      | 0.38                     | n/a                            |
| ICC                                                         | 0.21                               | 0.28                     | 0.19                     | 0.01                           |
| N studies                                                   | 24                                 | 21                       | 20                       | 11                             |
| Observations                                                | 577                                | 524                      | 450                      | 184                            |
| Conditional R <sup>2</sup>                                  | 0.57                               | 0.46                     | 0.35                     | 0.19                           |

Data are presented as fixed-effects coefficients (beta coefficients) and 95% confidence intervals (CI), unless stated otherwise: <sup>§</sup>mean and standard deviation. AUC<sub>0-24</sub>: area under the plasma concentration-time curve from 0 to 24 hours after dosing; HIV: human immunodeficiency virus; σ<sup>2</sup>: residual variance, τ<sub>00</sub>: random intercept variance, τ<sub>11</sub>: random slope variance, ρ<sub>01</sub>: random slope-intercept correlation, ICC: intraclass correlation coefficient, N: number of included studies, conditional R<sup>2</sup>: the proportion of variance explained by both the fixed and random effects. <sup>¶</sup>Drug dose was mean-centred by subtracting the mean from each data point, then standardized by dividing each point by the standard deviation. <sup>§§</sup>Moderate malnutrition was defined as a weight-for-age or height-for-age Z-score ≥-3 but <-2; and severe malnutrition was defined as a weight-for-age or height-for-age Z-score <-3. <sup>¶¶</sup>Details are described in Appendix 4. \*\*\*p<0.001, \*\*p<0.01, \*p<0.05, #p<0.1.

**Table E16. Multivariate linear mixed-effects analyses of factors associated with log-transformed  $C_{\max}$  values for first-line antituberculosis drugs in children under 5 years of age with tuberculosis**

|                                                      | Fixed-effects coefficient (95% CI) |                          |                          |                          |
|------------------------------------------------------|------------------------------------|--------------------------|--------------------------|--------------------------|
|                                                      | Isoniazid                          | Rifampicin               | Pyrazinamide             | Ethambutol               |
| (Intercept)                                          | 1.38 (1.15–1.61)***                | 1.95 (1.71–2.19)***      | 3.53 (3.42–3.63)***      | 0.32 (0.002–0.63)*       |
| Dose, mg/kg <sup>¶</sup>                             | 0.38 (0.27–0.50)***                | 0.30 (0.22–0.38)***      | 0.20 (0.13–0.27)***      | 0.14 (0.04–0.24)**       |
| Age                                                  |                                    |                          |                          |                          |
| <2 years                                             | -0.22 (-0.33–-0.11)***             | -0.27 (-0.40–-0.14)***   | -0.03 (-0.10–0.05)       | -0.36 (-0.56–-0.15)**    |
| 2–4 years                                            | Ref.                               | Ref.                     | Ref.                     | Ref.                     |
| Sex                                                  |                                    |                          |                          |                          |
| Female                                               | Ref.                               | Ref.                     | Ref.                     | Ref.                     |
| Male                                                 | 0.03 (-0.07–0.13)                  | 0.06 (-0.06–0.19)        | -0.04 (-0.11–0.03)       | 0.07 (-0.14–0.28)        |
| Malnourished <sup>§§</sup>                           |                                    |                          |                          |                          |
| No                                                   | Ref.                               | Ref.                     | Ref.                     | Ref.                     |
| Yes, moderate                                        | -0.13 (-0.26–0.01) <sup>#</sup>    | -0.13 (-0.28–0.03)       | -0.05 (-0.14–0.04)       | 0.005 (-0.27–0.28)       |
| Yes, severe                                          | -0.09 (-0.22–0.03)                 | -0.11 (-0.28–0.06)       | -0.07 (-0.16–0.02)       | -0.04 (-0.28–0.20)       |
| Unknown                                              | -0.01 (-0.39–0.37)                 | -0.15 (-1.22–0.92)       | -0.05 (-0.35–0.24)       | -0.36 (-1.07–0.35)       |
| HIV status                                           |                                    |                          |                          |                          |
| Negative                                             | Ref.                               | Ref.                     | Ref.                     | Ref.                     |
| Positive                                             | -0.20 (-0.34–-0.06)**              | -0.25 (-0.44–-0.06)**    | -0.18 (-0.27–-0.08)***   | -0.43 (-0.69–-0.17)***   |
| Unknown                                              | 0.19 (-0.12–0.50)                  | 0.04 (-0.34–0.43)        | 0.08 (-0.12–0.27)        | 0.10 (-0.36–0.56)        |
| Acetylator status, $t_{1/2}$ phenotype <sup>¶¶</sup> |                                    |                          |                          |                          |
| Slow                                                 | 0.23 (0.12–0.35)***                | n/a                      | n/a                      | n/a                      |
| Intermediate                                         | Ref.                               | n/a                      | n/a                      | n/a                      |
| Rapid                                                | -0.19 (-0.36–-0.03)*               | n/a                      | n/a                      | n/a                      |
| Unknown                                              | -0.36 (-0.62–-0.10)**              | n/a                      | n/a                      | n/a                      |
| Random effects                                       |                                    |                          |                          |                          |
| $\sigma^2$                                           | 0.35 (0.59) <sup>§</sup>           | 0.52 (0.72) <sup>§</sup> | 0.14 (0.37) <sup>§</sup> | 0.50 (0.71) <sup>§</sup> |
| $\tau_{00}$ studies                                  | 0.16 (0.40) <sup>§</sup>           | 0.20 (0.45) <sup>§</sup> | 0.02 (0.14) <sup>§</sup> | 0.11 (0.33) <sup>§</sup> |
| $\tau_{11}$ studies*doses                            | 0.03 (0.18) <sup>§</sup>           | n/a                      | 0.01 (0.10) <sup>§</sup> | n/a                      |
| $\rho_{01}$ studies                                  | -0.47                              | n/a                      | 0.47                     | n/a                      |
| ICC                                                  | 0.33                               | 0.28                     | 0.20                     | 0.18                     |
| N studies                                            | 24                                 | 21                       | 20                       | 11                       |
| Observations                                         | 589                                | 549                      | 470                      | 208                      |
| Conditional $R^2$                                    | 0.52                               | 0.43                     | 0.41                     | 0.29                     |

Data are presented as fixed-effects coefficients (beta coefficients) and 95% confidence intervals (CI), unless stated otherwise: <sup>§</sup>mean and standard deviation.  $C_{\max}$ : peak plasma concentration; HIV: human immunodeficiency virus;  $\sigma^2$ : residual variance,  $\tau_{00}$ : random intercept variance,  $\tau_{11}$ : random slope variance,  $\rho_{01}$ : random slope-intercept correlation, ICC: intraclass correlation coefficient, N: number of included studies, conditional  $R^2$ : the proportion of variance explained by both the fixed and random effects. <sup>¶</sup>Drug dose was mean-centred by subtracting the mean from each data point, then standardized by dividing each point by the standard deviation. <sup>§§</sup>Moderate malnutrition was defined as a weight-for-age or height-for-age Z-score  $\geq -3$  but  $< -2$ ; and severe malnutrition was defined as a weight-for-age or height-for-age Z-score  $< -3$ . <sup>¶¶</sup>Details are described in Appendix 4. \*\*\* $p < 0.001$ , \*\* $p < 0.01$ , \* $p < 0.05$ , # $p < 0.1$ .

**Table E17. Multivariate linear mixed-effects analyses of factors associated with log-transformed AUC<sub>0-24</sub> values for first-line antituberculosis drugs in children under 2 years of age with tuberculosis.**

|                                                            | Fixed-effects coefficient (95% CI) |                          |                                 |                          |
|------------------------------------------------------------|------------------------------------|--------------------------|---------------------------------|--------------------------|
|                                                            | Isoniazid                          | Rifampicin               | Pyrazinamide                    | Ethambutol               |
| (Intercept)                                                | 2.45 (1.64–3.25)***                | 2.80 (1.86–3.75)***      | 4.99 (4.40–5.57)***             | 1.78 (0.36–3.21)*        |
| Dose, mg/kg <sup>¶</sup>                                   | 0.42 (0.29–0.55)***                | 0.32 (0.22–0.42)***      | 0.12 (-0.02–0.27) <sup>#</sup>  | 0.33 (0.16–0.50)***      |
| Age                                                        | 0.19 (-0.49–0.86)                  | -0.42 (-1.31–0.47)       | -0.74 (-1.24–-0.24)**           | -0.17 (-1.27–0.93)       |
| Sex                                                        |                                    |                          |                                 |                          |
| Female                                                     | Ref.                               | Ref.                     | Ref.                            | Ref.                     |
| Male                                                       | 0.19 (0.05–0.34)*                  | -0.06 (-0.13–0.24)       | -0.11 (-0.23–0.00) <sup>#</sup> | 0.11 (-0.16–0.37)        |
| Malnourished <sup>§§</sup>                                 |                                    |                          |                                 |                          |
| No                                                         | Ref.                               | Ref.                     | Ref.                            | Ref.                     |
| Yes, moderate                                              | -0.14 (-0.33–0.05)                 | -0.02 (-0.21–0.24)       | -0.04 (-0.18–0.10)              | -0.11 (-0.44–0.22)       |
| Yes, severe                                                | -0.19 (-0.36–-0.02)*               | -0.12 (-0.36–0.11)       | 0.00 (-0.14–0.14)               | -0.11 (-0.41–0.20)       |
| Unknown                                                    | -0.12 (-0.76–0.51)                 | n/a                      | -0.25 (-0.91–0.41)              | -0.34 (-0.62–-0.06)**    |
| HIV status                                                 |                                    |                          |                                 |                          |
| Negative                                                   | Ref.                               | Ref.                     | Ref.                            | Ref.                     |
| Positive                                                   | -0.24 (-0.43–-0.05)*               | -0.16 (-0.43–0.10)       | -0.24 (-0.39–-0.09)**           | -0.34 (-0.62–-0.06)*     |
| Unknown                                                    | 0.10 (-0.30–0.50)                  | 0.03 (-0.47–0.53)        | 0.11 (-0.20–0.41)               | -0.20 (-0.76–0.36)       |
| Acetylase status, t <sub>1/2</sub> phenotype <sup>¶¶</sup> |                                    |                          |                                 |                          |
| Slow                                                       | 0.66 (0.49–0.82)***                | n/a                      | n/a                             | n/a                      |
| Intermediate                                               | Ref.                               | n/a                      | n/a                             | n/a                      |
| Rapid                                                      | -0.53 (-0.77–-0.30)***             | n/a                      | n/a                             | n/a                      |
| Unknown                                                    | -0.14 (-0.62–0.33)                 | n/a                      | n/a                             | n/a                      |
| Random effects                                             |                                    |                          |                                 |                          |
| σ <sup>2</sup>                                             | 0.35 (0.59) <sup>§</sup>           | 0.54 (0.73) <sup>§</sup> | 0.17 (0.41) <sup>§</sup>        | 0.30 (0.54) <sup>§</sup> |
| τ <sub>00</sub> studies                                    | 0.11 (0.34) <sup>§</sup>           | 0.08 (0.28) <sup>§</sup> | 0.14 (0.38) <sup>§</sup>        | 0.04 (0.20) <sup>§</sup> |
| τ <sub>11</sub> studies*doses                              | 0.02 (0.14) <sup>§</sup>           | n/a                      | 0.05 (0.22) <sup>§</sup>        | n/a                      |
| ρ <sub>01</sub> studies                                    | -0.49                              | n/a                      | -0.32                           | n/a                      |
| ICC                                                        | 0.26                               | 0.13                     | 0.54                            | 0.12                     |
| N studies                                                  | 23                                 | 20                       | 20                              | 8                        |
| Observations                                               | 289                                | 263                      | 244                             | 90                       |
| Conditional R <sup>2</sup>                                 | 0.62                               | 0.33                     | 0.59                            | 0.30                     |

Data are presented as fixed-effects coefficients (beta coefficients) and 95% confidence intervals (CI), unless stated otherwise: <sup>§</sup>mean and standard deviation. AUC<sub>0-24</sub>: area under the plasma concentration-time curve from 0 to 24 hours after dosing; HIV: human immunodeficiency virus; σ<sup>2</sup>: residual variance, τ<sub>00</sub>: random intercept variance, τ<sub>11</sub>: random slope variance, ρ<sub>01</sub>: random slope-intercept correlation, ICC: intraclass correlation coefficient, N: number of included studies, conditional R<sup>2</sup>: the proportion of variance explained by both the fixed and random effects. <sup>¶</sup>Drug dose was mean-centred by subtracting the mean from each data point, then standardized by dividing each point by the standard deviation. <sup>§§</sup>Moderate malnutrition was defined as a weight-for-age or height-for-age Z-score ≥-3 but <-2; and severe malnutrition was defined as a weight-for-age or height-for-age Z-score <-3. <sup>¶¶</sup>Details are described in Appendix 4. \*\*\*p<0.001, \*\*p<0.01, \*p<0.05, #p<0.1.

**Table E18. Multivariate linear mixed-effects analyses of factors associated with log-transformed  $C_{\max}$  values for first-line antituberculosis drugs in children under 2 years of age with tuberculosis.**

|                                                     | Fixed-effects coefficient (95% CI) |                                |                          |                          |
|-----------------------------------------------------|------------------------------------|--------------------------------|--------------------------|--------------------------|
|                                                     | Isoniazid                          | Rifampicin                     | Pyrazinamide             | Ethambutol               |
| (Intercept)                                         | 1.27 (0.45–2.09)**                 | 1.79 (0.78–2.80)**             | 3.38 (2.87–3.88)***      | 0.32 (-1.36–2.00)        |
| Dose, mg/kg <sup>¶</sup>                            | 0.44 (0.30–0.57)***                | 0.28 (0.16–0.39)***            | 0.21 (0.11–0.31)***      | 0.15 (0.02–0.28)*        |
| Age                                                 | 0.06 (-0.62–0.74)                  | 0.06 (-0.87–1.00)              | -0.13 (-0.59–0.32)       | 0.29 (-1.00–1.58)        |
| Sex                                                 |                                    |                                |                          |                          |
| Female                                              | Ref.                               | Ref.                           | Ref.                     | Ref.                     |
| Male                                                | 0.15 (0.002–0.29)*                 | 0.11 (-0.09–0.30)              | -0.00 (-0.10–0.10)       | 0.16 (-0.16–0.47)        |
| Malnourished <sup>§§</sup>                          |                                    |                                |                          |                          |
| No                                                  | Ref.                               | Ref.                           | Ref.                     | Ref.                     |
| Yes, moderate                                       | -0.08 (-0.27–0.11)                 | -0.18 (-0.42–0.06)             | -0.09 (-0.21–0.04)       | -0.07 (-0.45–0.31)       |
| Yes, severe                                         | -0.15 (-0.32–0.02) <sup>#</sup>    | -0.26 (-0.51–-0.01)*           | -0.10 (-0.22–0.03)       | -0.08 (-0.44–0.27)       |
| Unknown                                             | 0.32 (-0.30–0.95)                  | n/a                            | -0.30 (-0.75–0.16)       | -1.00 (-2.43–0.42)       |
| HIV status                                          |                                    |                                |                          |                          |
| Negative                                            | Ref.                               | Ref.                           | Ref.                     | Ref.                     |
| Positive                                            | -0.21 (-0.41–-0.02)*               | -0.21 (-0.49–0.07)             | -0.13 (-0.27–-0.001)*    | -0.40 (-0.75–-0.05)*     |
| Unknown                                             | 0.12 (-0.27–0.51)                  | 0.32 (-0.22–0.86) <sup>#</sup> | 0.19 (-0.07–0.46)        | 0.39 (-0.22–1.00)        |
| Acetylase status, $t_{1/2}$ phenotype <sup>¶¶</sup> |                                    |                                |                          |                          |
| Slow                                                | 0.37 (0.19–0.56)***                | n/a                            | n/a                      | n/a                      |
| Intermediate                                        | Ref.                               | n/a                            | n/a                      | n/a                      |
| Rapid                                               | 0.01 (-0.23–0.24)                  | n/a                            | n/a                      | n/a                      |
| Unknown                                             | -0.30 (-0.56–-0.04)*               | n/a                            | n/a                      | n/a                      |
| Random effects                                      |                                    |                                |                          |                          |
| $\sigma^2$                                          | 0.36 (0.60) <sup>§</sup>           | 0.62 (0.79) <sup>§</sup>       | 0.14 (0.38) <sup>§</sup> | 0.45 (0.67) <sup>§</sup> |
| $\tau_{00}$ studies                                 | 0.10 (0.31) <sup>§</sup>           | 0.27 (0.52) <sup>§</sup>       | 0.04 (0.21) <sup>§</sup> | 0.16 (0.41) <sup>§</sup> |
| $\tau_{11}$ studies*doses                           | 0.03 (0.16) <sup>§</sup>           | n/a                            | 0.02 (0.14) <sup>§</sup> | n/a                      |
| $\rho_{01}$ studies                                 | -0.34                              | n/a                            | 0.34                     | n/a                      |
| ICC                                                 | 0.25                               | 0.30                           | 0.35                     | 0.26                     |
| N studies                                           | 23                                 | 21                             | 20                       | 10                       |
| Observations                                        | 294                                | 278                            | 254                      | 102                      |
| Conditional R <sup>2</sup>                          | 0.55                               | 0.41                           | 0.51                     | 0.37                     |

Data are presented as fixed-effects coefficients (beta coefficients) and 95% confidence intervals (CI), unless stated otherwise: <sup>§</sup>mean and standard deviation.  $C_{\max}$ : peak plasma concentration; HIV: human immunodeficiency virus;  $\sigma^2$ : residual variance,  $\tau_{00}$ : random intercept variance,  $\tau_{11}$ : random slope variance,  $\rho_{01}$ : random slope-intercept correlation, ICC: intraclass correlation coefficient, N: number of included studies, conditional R<sup>2</sup>: the proportion of variance explained by both the fixed and random effects. <sup>¶</sup>Drug dose was mean-centred by subtracting the mean from each data point, then standardized by dividing each point by the standard deviation. <sup>§§</sup>Moderate malnutrition was defined as a weight-for-age or height-for-age Z-score  $\geq -3$  but  $< -2$ ; and severe malnutrition was defined as a weight-for-age or height-for-age Z-score  $< -3$ . <sup>¶¶</sup>Details are described in Appendix 4. \*\*\* $p < 0.001$ , \*\* $p < 0.01$ , \* $p < 0.05$ , <sup>#</sup> $p < 0.1$ .

**Table E19. Multivariate linear mixed-effects analyses of factors associated with log-transformed AUC<sub>0-24</sub> values for first-line antituberculosis drugs in children and adolescents with tuberculosis who had pharmacokinetic sampling at steady state or approaching steady state.**

|                                                             | Fixed-effects coefficient (95% CI) |                                 |                          |                                 |
|-------------------------------------------------------------|------------------------------------|---------------------------------|--------------------------|---------------------------------|
|                                                             | Isoniazid                          | Rifampicin                      | Pyrazinamide             | Ethambutol                      |
| (Intercept)                                                 | 2.56 (2.36–2.77)***                | 3.83 (3.62–4.03)***             | 6.08 (5.93–6.22)***      | 2.48 (2.20–2.77)***             |
| Dose, mg/kg <sup>¶</sup>                                    | 0.43 (0.34–0.53)***                | 0.65 (0.44–0.86)***             | 0.16 (0.09–0.24)***      | 0.23 (0.11–0.34)***             |
| Age                                                         |                                    |                                 |                          |                                 |
| <2 years                                                    | -0.31 (-0.43–0.18)***              | -0.49 (-0.65–0.33)***           | -0.34 (-0.45–0.23)***    | -0.53 (-0.75–0.32)***           |
| 2–4 years                                                   | -0.10 (-0.21–0.02)                 | -0.36 (-0.51–0.21)***           | -0.26 (-0.37–0.16)***    | -0.37 (-0.58–0.17)***           |
| 5–9 years                                                   | -0.06 (-0.16–0.05)                 | -0.13 (-0.27–0.01) <sup>#</sup> | -0.16 (-0.26–0.07)**     | -0.16 (-0.35–0.02) <sup>#</sup> |
| 10–14 years                                                 | Ref.                               | Ref.                            | Ref.                     | Ref.                            |
| 15–18 years                                                 | 0.08 (-0.26–0.42)                  | 0.27 (-0.16–0.71)               | -0.04 (-0.37–0.29)       | 0.31 (-0.26–0.87)               |
| Sex                                                         |                                    |                                 |                          |                                 |
| Female                                                      | Ref.                               | Ref.                            | Ref.                     | Ref.                            |
| Male                                                        | -0.03 (-0.11–0.04)                 | -0.05 (-0.14–0.04) <sup>#</sup> | -0.06 (-0.13–0.002)*     | -0.06 (-0.19–0.08)              |
| Malnourished <sup>§§</sup>                                  |                                    |                                 |                          |                                 |
| No                                                          | Ref.                               | Ref.                            | Ref.                     | Ref.                            |
| Yes, moderate                                               | -0.12 (-0.21–0.02)*                | -0.01 (-0.10–0.12)              | -0.03 (-0.11–0.05)       | -0.09 (-0.26–0.07)              |
| Yes, severe                                                 | -0.16 (-0.25–0.06)**               | -0.03 (-0.15–0.09)              | -0.08 (-0.16–0.003)*     | -0.09 (-0.26–0.08)              |
| Unknown                                                     | 0.08 (-0.21–0.37)                  | -0.11 (-0.74–0.51)              | -0.10 (-0.45–0.25)       | 0.13 (-0.63–0.89)               |
| HIV status                                                  |                                    |                                 |                          |                                 |
| Negative                                                    | Ref.                               | Ref.                            | Ref.                     | Ref.                            |
| Positive                                                    | -0.15 (-0.26–0.04)**               | -0.25 (-0.39–0.10)**            | -0.22 (-0.31–0.12)***    | 0.40 (-0.57–0.22)***            |
| Unknown                                                     | -0.11 (-0.38–0.17)                 | -0.38 (-0.72–0.04)*             | 0.02 (-0.21–0.25)        | -0.08 (-0.51–0.35)              |
| Acetylator status, t <sub>1/2</sub> phenotype <sup>¶¶</sup> |                                    |                                 |                          |                                 |
| Slow                                                        | 0.70 (0.62–0.78)***                | n/a                             | n/a                      | n/a                             |
| Intermediate                                                | Ref.                               | n/a                             | n/a                      | n/a                             |
| Rapid                                                       | -0.38 (-0.50–0.26)***              | n/a                             | n/a                      | n/a                             |
| Unknown                                                     | 0.47 (0.27–0.66)***                | n/a                             | n/a                      | n/a                             |
| Random effects                                              |                                    |                                 |                          |                                 |
| σ <sup>2</sup>                                              | 0.36 (0.60) <sup>§</sup>           | 0.48 (0.69) <sup>§</sup>        | 0.21 (0.45) <sup>§</sup> | 0.43 (0.65) <sup>§</sup>        |
| τ <sub>00</sub> studies                                     | 0.14 (0.38) <sup>§</sup>           | 0.09 (0.30) <sup>§</sup>        | 0.05 (0.23) <sup>§</sup> | 0.09 (0.30) <sup>§</sup>        |
| τ <sub>11</sub> studies*doses                               | 0.03 (0.17) <sup>§</sup>           | 0.12 (0.35) <sup>§</sup>        | 0.01 (0.11) <sup>§</sup> | n/a                             |
| ρ <sub>01</sub> studies                                     | -0.75                              | -0.33                           | -0.17                    | n/a                             |
| ICC                                                         | 0.28                               | 0.33                            | 0.24                     | 0.17                            |
| N studies                                                   | 23                                 | 20                              | 18                       | 10                              |
| Observations                                                | 1163                               | 1002                            | 869                      | 393                             |
| Conditional R <sup>2</sup>                                  | 0.59                               | 0.62                            | 0.37                     | 0.31                            |

Data are presented as fixed-effects coefficients (beta coefficients) and 95% confidence intervals (CI), unless stated otherwise: <sup>§</sup>mean and standard deviation. AUC<sub>0-24</sub>: area under the plasma concentration-time curve from 0 to 24 hours after dosing; HIV: human immunodeficiency virus; σ<sup>2</sup>: residual variance, τ<sub>00</sub>: random intercept variance, τ<sub>11</sub>: random slope variance, ρ<sub>01</sub>: random slope-intercept correlation, ICC: intraclass correlation coefficient, N: number of included studies, conditional R<sup>2</sup>: the proportion of variance explained by both the fixed and random effects. <sup>¶</sup>Drug dose was mean-centred by subtracting the mean from each data point, then standardized by dividing each point by the standard deviation. <sup>§§</sup>Moderate malnutrition was defined as a weigh-for-age or height-for-age Z-score ≥-3 but <-2 in children aged <5 years, and a height-for-age or body mass index-for-age Z-score ≥-3 but <-2 in children aged ≥5 years; and severe malnutrition was defined as a weigh-for-age or height-for-age Z-score <-3 in children aged <5 years, and a height-for-age or body mass index-for-age Z-score <-3 in children aged ≥5 years. <sup>¶¶</sup>Details are described in Appendix 4. \*\*\*p<0.001, \*\*p<0.01, \*p<0.05, #p<0.1.

**Table E20. Multivariate linear mixed-effects analyses of factors associated with log-transformed  $C_{\max}$  values for first-line antituberculosis drugs in children and adolescents with tuberculosis who had pharmacokinetic sampling at steady state or approaching steady state.**

|                                                      | Fixed-effects coefficient (95% CI) |                          |                                  |                          |
|------------------------------------------------------|------------------------------------|--------------------------|----------------------------------|--------------------------|
|                                                      | Isoniazid                          | Rifampicin               | Pyrazinamide                     | Ethambutol               |
| (Intercept)                                          | 1.46 (1.26–1.67)***                | 2.21 (2.00–2.42)***      | 3.75 (3.62–3.88)***              | 0.76 (0.50–1.02)***      |
| Dose, mg/kg <sup>¶</sup>                             | 0.42 (0.29–0.54)***                | 0.52 (0.32–0.73)***      | 0.16 (0.10–0.22)***              | 0.17 (0.07–0.27)**       |
| Age                                                  |                                    |                          |                                  |                          |
| <2 years                                             | -0.30 (-0.43–0.17)***              | -0.44 (-0.59–0.28)***    | -0.20 (-0.31–0.10)***            | -0.67 (-0.89–0.44)***    |
| 2–4 years                                            | -0.09 (-0.20–0.03)                 | -0.19 (-0.34–0.05)**     | -0.16 (-0.26–0.06)**             | -0.33 (-0.54–0.12)**     |
| 5–9 years                                            | -0.04 (-0.15–0.06)                 | -0.10 (-0.23–0.04)       | -0.13 (-0.21–0.04)**             | -0.09 (-0.28–0.09)       |
| 10–14 years                                          | Ref.                               | Ref.                     | Ref.                             | Ref.                     |
| 15–18 years                                          | -0.02 (-0.35–0.31)                 | 0.08 (-0.34–0.50)        | -0.06 (-0.36–0.25)               | 0.11 (-0.50–0.71)        |
| Sex                                                  |                                    |                          |                                  |                          |
| Female                                               | Ref.                               | Ref.                     | Ref.                             | Ref.                     |
| Male                                                 | -0.05 (-0.12–0.02)                 | -0.02 (-0.07–0.10)       | -0.06 (-0.12–0.002) <sup>#</sup> | -0.05 (-0.18–0.09)       |
| Malnourished <sup>§§</sup>                           |                                    |                          |                                  |                          |
| No                                                   | Ref.                               | Ref.                     | Ref.                             | Ref.                     |
| Yes, moderate                                        | -0.07 (-0.16–0.02)                 | -0.04 (-0.15–0.07)       | -0.02 (-0.09–0.06)               | -0.10 (-0.27–0.07)       |
| Yes, severe                                          | -0.09 (-0.18–0.01) <sup>#</sup>    | -0.13 (-0.24–0.01)*      | -0.10 (-0.18–0.02)*              | -0.11 (-0.28–0.06)       |
| Unknown                                              | 0.04 (-0.27–0.34)                  | -0.16 (-0.73–0.42)       | -0.07 (-0.39–0.25)               | -0.29 (-0.89–0.31)       |
| HIV status                                           |                                    |                          |                                  |                          |
| Negative                                             | Ref.                               | Ref.                     | Ref.                             | Ref.                     |
| Positive                                             | -0.17 (-0.28–0.06)**               | -0.24 (-0.38–0.10)**     | -0.11 (-0.20–0.02)*              | -0.39 (-0.57–0.20)***    |
| Unknown                                              | 0.02 (-0.26–0.29)                  | -0.22 (-0.55–0.11)       | -0.13 (-0.35–0.08)               | 0.04 (-0.34–0.42)        |
| Acetylator status, $t_{1/2}$ phenotype <sup>¶¶</sup> |                                    |                          |                                  |                          |
| Slow                                                 | 0.24 (0.15–0.32)***                | n/a                      | n/a                              | n/a                      |
| Intermediate                                         | Ref.                               | n/a                      | n/a                              | n/a                      |
| Rapid                                                | -0.12 (-0.24–0.001) <sup>#</sup>   | n/a                      | n/a                              | n/a                      |
| Unknown                                              | -0.35 (-0.51–0.20)***              | n/a                      | n/a                              | n/a                      |
| Random effects                                       |                                    |                          |                                  |                          |
| $\sigma^2$                                           | 0.37 (0.61) <sup>§</sup>           | 0.50 (0.71) <sup>§</sup> | 0.20 (0.44) <sup>§</sup>         | 0.52 (0.72) <sup>§</sup> |
| $\tau_{00}$ studies                                  | 0.15 (0.38) <sup>§</sup>           | 0.11 (0.34) <sup>§</sup> | 0.03 (0.18) <sup>§</sup>         | 0.06 (0.25) <sup>§</sup> |
| $\tau_{11}$ studies*doses                            | 0.05 (0.23) <sup>§</sup>           | 0.11 (0.33) <sup>§</sup> | 0.01 (0.09) <sup>§</sup>         | n/a                      |
| $\rho_{01}$ studies                                  | -0.33                              | -0.01                    | -0.10                            | n/a                      |
| ICC                                                  | 0.33                               | 0.33                     | 0.18                             | 0.11                     |
| N studies                                            | 23                                 | 20                       | 18                               | 10                       |
| Observations                                         | 1203                               | 1065                     | 924                              | 465                      |
| Conditional R <sup>2</sup>                           | 0.52                               | 0.56                     | 0.30                             | 0.26                     |

Data are presented as fixed-effects coefficients (beta coefficients) and 95% confidence intervals (CI), unless stated otherwise: <sup>§</sup>mean and standard deviation.  $C_{\max}$ : peak plasma concentration; HIV: human immunodeficiency virus;  $\sigma^2$ : residual variance,  $\tau_{00}$ : random intercept variance,  $\tau_{11}$ : random slope variance,  $\rho_{01}$ : random slope-intercept correlation, ICC: intraclass correlation coefficient, N: number of included studies, conditional R<sup>2</sup>: the proportion of variance explained by both the fixed and random effects. <sup>¶</sup>Drug dose was mean-centred by subtracting the mean from each data point, then standardized by dividing each point by the standard deviation. <sup>§§</sup>Moderate malnutrition was defined as a weigh-for-age or height-for-age Z-score  $\geq -3$  but  $< -2$  in children aged  $< 5$  years, and a height-for-age or body mass index-for-age Z-score  $\geq -3$  but  $< -2$  in children aged  $\geq 5$  years; and severe malnutrition was defined as a weigh-for-age or height-for-age Z-score  $< -3$  in children aged  $< 5$  years, and a height-for-age or body mass index-for-age Z-score  $< -3$  in children aged  $\geq 5$  years. <sup>¶¶</sup>Details are described in Appendix 4. \*\*\* $p < 0.001$ , \*\* $p < 0.01$ , \* $p < 0.05$ , <sup>#</sup> $p < 0.1$ .

**Table E21. Multivariate linear mixed-effects analyses of factors associated with log-transformed AUC<sub>0-24</sub> values for first-line antituberculosis drugs, in children and adolescents with tuberculosis who had pharmacokinetic sampling at steady state or approaching steady state, and who received daily dosing.**

|                                                             | Fixed-effects coefficient (95% CI) |                          |                                  |                                 |
|-------------------------------------------------------------|------------------------------------|--------------------------|----------------------------------|---------------------------------|
|                                                             | Isoniazid                          | Rifampicin               | Pyrazinamide                     | Ethambutol                      |
| (Intercept)                                                 | 2.50 (2.28–2.72)***                | 3.83 (3.61–4.05)***      | 6.11 (5.95–6.28)***              | 2.48 (2.20–2.77)***             |
| Dose, mg/kg <sup>¶</sup>                                    | 0.44 (0.33–0.55)***                | 0.62 (0.40–0.84)***      | 0.18 (0.08–0.27)***              | 0.23 (0.11–0.34)***             |
| Age                                                         |                                    |                          |                                  |                                 |
| <2 years                                                    | -0.27 (-0.40–-0.13)***             | -0.51 (-0.68–-0.34)***   | -0.32 (-0.44–-0.21)***           | -0.53 (-0.75–-0.32)***          |
| 2–4 years                                                   | -0.05 (-0.18–0.08)                 | -0.34 (-0.51–-0.18)***   | -0.25 (-0.36–-0.13)***           | -0.37 (-0.58–-0.17)***          |
| 5–9 years                                                   | -0.05 (-0.17–0.07)                 | -0.18 (-0.34–-0.02)*     | -0.19 (-0.29–-0.08)***           | -0.16 (-0.35–0.02) <sup>#</sup> |
| 10–14 years                                                 | Ref.                               | Ref.                     | Ref.                             | Ref.                            |
| 15–18 years                                                 | 0.03 (-0.36–0.42)                  | 0.24 (-0.27–0.74)        | -0.09 (-0.44–0.25)               | 0.31 (-0.26–0.87)               |
| Sex                                                         |                                    |                          |                                  |                                 |
| Female                                                      | Ref.                               | Ref.                     | Ref.                             | Ref.                            |
| Male                                                        | -0.04 (-0.12–0.04)                 | -0.04 (-0.13–0.06)       | -0.07 (-0.14–-0.01)*             | -0.06 (-0.19–0.08)              |
| Malnourished <sup>§§</sup>                                  |                                    |                          |                                  |                                 |
| No                                                          | Ref.                               | Ref.                     | Ref.                             | Ref.                            |
| Yes, moderate                                               | -0.14 (-0.24–-0.04)**              | -0.04 (-0.08–0.15)       | -0.06 (-0.14–0.02)               | -0.09 (-0.26–0.07)              |
| Yes, severe                                                 | -0.17 (-0.27–-0.07)**              | -0.01 (-0.14–0.12)       | -0.08 (-0.16–0.002) <sup>#</sup> | -0.09 (-0.26–0.08)              |
| Unknown                                                     | 0.08 (-0.22–0.38)                  | -0.09 (-0.70–0.52)       | -0.10 (-0.43–0.23)               | 0.13 (-0.63–0.89)               |
| HIV status                                                  |                                    |                          |                                  |                                 |
| Negative                                                    | Ref.                               | Ref.                     | Ref.                             | Ref.                            |
| Positive                                                    | -0.16 (-0.27–-0.05)**              | -0.24 (-0.38–-0.10)**    | -0.22 (-0.31–-0.13)***           | -0.40 (-0.57–-0.22)***          |
| Unknown                                                     | -0.12 (-0.39–0.16)                 | -0.37 (-0.71–-0.04)*     | 0.02 (-0.20–0.23)                | -0.08 (-0.51–0.35)              |
| Acetylator status, t <sub>1/2</sub> phenotype <sup>¶¶</sup> |                                    |                          |                                  |                                 |
| Slow                                                        | 0.73 (0.64–0.83)***                | n/a                      | n/a                              | n/a                             |
| Intermediate                                                | Ref.                               | n/a                      | n/a                              | n/a                             |
| Rapid                                                       | -0.38 (-0.51–-0.24)***             | n/a                      | n/a                              | n/a                             |
| Unknown                                                     | 0.46 (0.25–0.66)***                | n/a                      | n/a                              | n/a                             |
| Random effects                                              |                                    |                          |                                  |                                 |
| σ <sup>2</sup>                                              | 0.37 (0.60) <sup>§</sup>           | 0.46 (0.68) <sup>§</sup> | 0.18 (0.43) <sup>§</sup>         | 0.43 (0.65) <sup>§</sup>        |
| τ <sub>00</sub> studies                                     | 0.14 (0.38) <sup>§</sup>           | 0.10 (0.31) <sup>§</sup> | 0.06 (0.25) <sup>§</sup>         | 0.09 (0.09) <sup>§</sup>        |
| τ <sub>11</sub> studies*doses                               | 0.03 (0.18) <sup>§</sup>           | 0.11 (0.33) <sup>§</sup> | 0.02 (0.15) <sup>§</sup>         | n/a                             |
| ρ <sub>01</sub> studies                                     | -0.64                              | -0.16                    | -0.22                            | n/a                             |
| ICC                                                         | 0.30                               | 0.36                     | 0.32                             | 0.17                            |
| N studies                                                   | 21                                 | 19                       | 17                               | 10                              |
| Observations                                                | 971                                | 834                      | 727                              | 393                             |
| Conditional R <sup>2</sup>                                  | 0.61                               | 0.65                     | 0.45                             | 0.31                            |

Data are presented as fixed-effects coefficients (beta coefficients) and 95% confidence intervals (CI), unless stated otherwise: <sup>§</sup>mean and standard deviation. AUC<sub>0-24</sub>: area under the plasma concentration-time curve from 0 to 24 hours after dosing; HIV: human immunodeficiency virus; σ<sup>2</sup>: residual variance, τ<sub>00</sub>: random intercept variance, τ<sub>11</sub>: random slope variance, ρ<sub>01</sub>: random slope-intercept correlation, ICC: intraclass correlation coefficient, N: number of included studies, conditional R<sup>2</sup>: the proportion of variance explained by both the fixed and random effects. <sup>¶</sup>Drug dose was mean-centred by subtracting the mean from each data point, then standardized by dividing each point by the standard deviation. <sup>§§</sup>Moderate malnutrition was defined as a weigh-for-age or height-for-age Z-score ≥-3 but <-2 in children aged <5 years, and a height-for-age or body mass index-for-age Z-score ≥-3 but <-2 in children aged ≥5 years; and severe malnutrition was defined as a weigh-for-age or height-for-age Z-score <-3 in children aged <5 years, and a height-for-age or body mass index-for-age Z-score <-3 in children aged ≥5 years. <sup>¶¶</sup>Details are described in Appendix 4. \*\*\*p<0.001, \*\*p<0.01, \*p<0.05, <sup>#</sup>p<0.1.

**Table E22. Multivariate linear mixed-effects analyses of factors associated with log-transformed  $C_{max}$  values for first-line antituberculosis drugs, in children and adolescents with tuberculosis who had pharmacokinetic sampling at steady state or approaching steady state, and who received daily dosing.**

|                                                       | Fixed-effects coefficient (95% CI) |                          |                          |                          |
|-------------------------------------------------------|------------------------------------|--------------------------|--------------------------|--------------------------|
|                                                       | Isoniazid                          | Rifampicin               | Pyrazinamide             | Ethambutol               |
| (Intercept)                                           | 1.43 (1.20–1.66)***                | 2.23 (2.01–2.44)***      | 3.77 (3.63–3.92)***      | 0.74 (0.47–1.01)***      |
| Dose, mg/kg <sup>¶</sup>                              | 0.43 (0.28–0.58)***                | 0.51 (0.29–0.73)***      | 0.17 (0.09–0.25)***      | 0.16 (0.06–0.26)**       |
| Age                                                   |                                    |                          |                          |                          |
| <2 years                                              | -0.26 (-0.40–0.12)***              | -0.42 (-0.58–0.25)***    | -0.21 (-0.32–0.09)***    | -0.66 (-0.88–0.44)***    |
| 2–4 years                                             | -0.04 (-0.17–0.09)                 | -0.17 (-0.33–0.004)*     | -0.16 (-0.27–0.04)**     | -0.33 (-0.54–0.12)**     |
| 5–9 years                                             | -0.03 (-0.15–0.09)                 | -0.12 (-0.28–0.03)       | -0.17 (-0.27–0.07)**     | -0.10 (-0.29–0.08)       |
| 10–14 years                                           | Ref.                               | Ref.                     | Ref.                     | Ref.                     |
| 15–18 years                                           | -0.10 (-0.49–0.28)                 | 0.03 (-0.45–0.52)        | -0.11 (-0.44–0.21)       | 0.14 (-0.46–0.75)        |
| Sex                                                   |                                    |                          |                          |                          |
| Female                                                | Ref.                               | Ref.                     | Ref.                     | Ref.                     |
| Male                                                  | -0.05 (-0.13–0.03)                 | 0.01 (-0.09–0.10)        | -0.07 (-0.13–0.001)*     | -0.04 (-0.18–0.09)       |
| Malnourished <sup>§§</sup>                            |                                    |                          |                          |                          |
| No                                                    | Ref.                               | Ref.                     | Ref.                     | Ref.                     |
| Yes, moderate                                         | -0.09 (-0.19–0.01) <sup>#</sup>    | 0.002 (-0.12–0.12)       | -0.03 (-0.11–0.05)       | -0.10 (-0.27–0.07)       |
| Yes, severe                                           | -0.09 (-0.19–0.01) <sup>#</sup>    | -0.12 (-0.25–0.01)       | -0.10 (-0.19–0.02)*      | -0.11 (-0.28–0.06)       |
| Unknown                                               | 0.03 (-0.28–0.34)                  | -0.13 (-0.71–0.44)       | -0.06 (-0.38–0.27)       | -0.27 (-0.87–0.33)       |
| HIV status                                            |                                    |                          |                          |                          |
| Negative                                              | Ref.                               | Ref.                     | Ref.                     | Ref.                     |
| Positive                                              | -0.17 (-0.28–0.06)**               | -0.24 (-0.38–0.10)**     | -0.11 (-0.21–0.02)*      | -0.38 (-0.57–0.19)***    |
| Unknown                                               | 0.01 (-0.27–0.28)                  | -0.23 (-0.55–0.10)       | -0.13 (-0.34–0.09)       | 0.06 (-0.33–0.44)        |
| Acetylator status, $t_{1/2}$ phenotype <sup>**¶</sup> |                                    |                          |                          |                          |
| Slow                                                  | 0.26 (0.17–0.35)***                | n/a                      | n/a                      | n/a                      |
| Intermediate                                          | Ref.                               | n/a                      | n/a                      | n/a                      |
| Rapid                                                 | -0.08 (-0.22–0.05)                 | n/a                      | n/a                      | n/a                      |
| Unknown                                               | -0.36 (-0.53–0.20)***              | n/a                      | n/a                      | n/a                      |
| Random effects                                        |                                    |                          |                          |                          |
| $\sigma^2$                                            | 0.37 (0.61) <sup>§</sup>           | 0.49 (0.70) <sup>§</sup> | 0.20 (0.45) <sup>§</sup> | 0.52 (0.72) <sup>§</sup> |
| $\tau_{00}$ studies                                   | 0.15 (0.39) <sup>§</sup>           | 0.10 (0.32) <sup>§</sup> | 0.04 (0.20) <sup>§</sup> | 0.07 (0.26) <sup>§</sup> |
| $\tau_{11}$ studies*doses                             | 0.08 (0.28) <sup>§</sup>           | 0.10 (0.32) <sup>§</sup> | 0.01 (0.10) <sup>§</sup> | n/a                      |
| $\rho_{01}$ studies                                   | -0.22                              | 0.17                     | 0.00                     | n/a                      |
| ICC                                                   | 0.37                               | 0.35                     | 0.21                     | 0.12                     |
| N studies                                             | 21                                 | 19                       | 17                       | 10                       |
| Observations                                          | 1009                               | 890                      | 779                      | 463                      |
| Conditional $R^2$                                     | 0.55                               | 0.58                     | 0.33                     | 0.26                     |

Data are presented as fixed-effects coefficients (beta coefficients) and 95% confidence intervals (CI), unless stated otherwise: <sup>§</sup>mean and standard deviation.  $C_{max}$ : peak plasma concentration; HIV: human immunodeficiency virus;  $\sigma^2$ : residual variance,  $\tau_{00}$ : random intercept variance,  $\tau_{11}$ : random slope variance,  $\rho_{01}$ : random slope-intercept correlation, ICC: intraclass correlation coefficient, N: number of included studies, conditional  $R^2$ : the proportion of variance explained by both the fixed and random effects. <sup>¶</sup>Drug dose was mean-centred by subtracting the mean from each data point, then standardized by dividing each point by the standard deviation. <sup>§§</sup>Moderate malnutrition was defined as a weigh-for-age or height-for-age Z-score  $\geq -3$  but  $< -2$  in children aged  $< 5$  years, and a height-for-age or body mass index-for-age Z-score  $\geq -3$  but  $< -2$  in children aged  $\geq 5$  years; and severe malnutrition was defined as a weigh-for-age or height-for-age Z-score  $< -3$  in children aged  $< 5$  years, and a height-for-age or body mass index-for-age Z-score  $< -3$  in children aged  $\geq 5$  years. <sup>\*\*¶</sup>Details are described in Appendix 4. \*\*\* $p < 0.001$ , \*\* $p < 0.01$ , \* $p < 0.05$ , # $p < 0.1$ .

**Table E23. Multivariate linear mixed-effects analyses of factors associated with log-transformed AUC<sub>0-24</sub> values for first-line antituberculosis drugs in children and adolescents with tuberculosis, considering WHO region as a third-level clustering variable.**

|                                                             | Fixed-effects coefficient (95% CI) |                                 |                          |                          |
|-------------------------------------------------------------|------------------------------------|---------------------------------|--------------------------|--------------------------|
|                                                             | Isoniazid                          | Rifampicin                      | Pyrazinamide             | Ethambutol               |
| (Intercept)                                                 | 2.55 (2.37–2.74)***                | 3.86 (3.66–4.06)***             | 6.04 (5.90–6.17)***      | 2.44 (2.05–2.83)***      |
| Dose, mg/kg <sup>¶</sup>                                    | 0.42 (0.34–0.51)***                | 0.65 (0.44–0.85)***             | 0.17 (0.10–0.23)***      | 0.15 (0.06–0.24)**       |
| Age                                                         |                                    |                                 |                          |                          |
| <2 years                                                    | -0.28 (-0.40–0.16)***              | -0.48 (-0.64–0.33)***           | -0.28 (-0.38–0.17)***    | -0.56 (-0.78–0.34)***    |
| 2–4 years                                                   | -0.07 (-0.18–0.04)                 | -0.35 (-0.50–0.21)***           | -0.24 (-0.34–0.14)***    | -0.36 (-0.57–0.16)**     |
| 5–9 years                                                   | -0.04 (-0.14–0.06)                 | -0.12 (-0.26–0.01) <sup>#</sup> | -0.12 (-0.21–0.03)**     | -0.19 (-0.38–0.01)*      |
| 10–14 years                                                 | Ref.                               | Ref.                            | Ref.                     | Ref.                     |
| 15–18 years                                                 | 0.05 (-0.24–0.33)                  | 0.22 (-0.16–0.60)               | -0.004 (-0.27–0.26)      | 0.24 (-0.34–0.83)        |
| Sex                                                         |                                    |                                 |                          |                          |
| Female                                                      | Ref.                               | Ref.                            | Ref.                     | Ref.                     |
| Male                                                        | -0.03 (-0.10–0.04)                 | -0.05 (-0.13–0.04)              | -0.08 (-0.14–0.02)**     | 0.03 (-0.16–0.10)        |
| Malnourished <sup>§§</sup>                                  |                                    |                                 |                          |                          |
| No                                                          | Ref.                               | Ref.                            | Ref.                     | Ref.                     |
| Yes, moderate                                               | -0.10 (-0.19–0.01)*                | 0.02 (-0.09–0.12)               | -0.03 (-0.10–0.05)       | -0.09 (-0.25–0.08)       |
| Yes, severe                                                 | -0.15 (-0.24–0.06)**               | -0.02 (-0.13–0.10)              | -0.08 (-0.16–0.004)*     | -0.09 (-0.26–0.08)       |
| Unknown                                                     | 0.13 (-0.13–0.39)                  | -0.05 (-0.61–0.51)              | -0.002 (-0.23–0.23)      | -0.12 (-0.61–0.37)       |
| HIV status                                                  |                                    |                                 |                          |                          |
| Negative                                                    | Ref.                               | Ref.                            | Ref.                     | Ref.                     |
| Positive                                                    | -0.15 (-0.25–0.04)**               | -0.25 (-0.39–0.11)***           | -0.19 (-0.29–0.10)***    | -0.39 (-0.56–0.22)***    |
| Unknown                                                     | -0.06 (-0.30–0.18)                 | -0.33 (-0.64–0.01)*             | 0.01 (-0.18–0.20)        | -0.10 (-0.51–0.31)       |
| Acetylator status, t <sub>1/2</sub> phenotype <sup>¶¶</sup> |                                    |                                 |                          |                          |
| Slow                                                        | 0.70 (0.62–0.77)***                | n/a                             | n/a                      | n/a                      |
| Intermediate                                                | Ref.                               | n/a                             | n/a                      | n/a                      |
| Rapid                                                       | -0.39 (-0.50–0.28)***              | n/a                             | n/a                      | n/a                      |
| Unknown                                                     | 0.44 (0.25–0.63)***                | n/a                             | n/a                      | n/a                      |
| Random effects                                              |                                    |                                 |                          |                          |
| σ <sup>2</sup>                                              | 0.35 (0.59) <sup>§</sup>           | 0.47 (0.68) <sup>§</sup>        | 0.21 (0.46) <sup>§</sup> | 0.44 (0.66) <sup>§</sup> |
| τ <sub>00</sub> WHO regions:studies                         | 0.12 (0.35) <sup>§</sup>           | 0.11 (0.32) <sup>§</sup>        | 0.04 (0.21) <sup>§</sup> | 0.04 (0.20) <sup>§</sup> |
| τ <sub>00</sub> WHO regions                                 | 0.00 (0.04) <sup>§</sup>           | n/a                             | n/a                      | 0.07 (0.26) <sup>§</sup> |
| τ <sub>11</sub> WHO regions:studies*doses                   | 0.03 (0.16) <sup>§</sup>           | 0.12 (0.35) <sup>§</sup>        | 0.01 (0.10) <sup>§</sup> | n/a                      |
| ρ <sub>01</sub> WHO regions:studies                         | -0.74                              | -0.25                           | -0.15                    | n/a                      |
| ICC                                                         | 0.27                               | 0.35                            | 0.21                     | 0.19                     |
| N WHO regions                                               | 3                                  | 3                               | 3                        | 3                        |
| N studies                                                   | 27                                 | 22                              | 23                       | 11                       |
| Observations                                                | 1252                               | 1041                            | 962                      | 410                      |
| Conditional R <sup>2</sup>                                  | 0.58                               | 0.63                            | 0.34                     | 0.32                     |

Data are presented as fixed-effects coefficients (beta coefficients) and 95% confidence intervals (CI), unless stated otherwise: <sup>§</sup>mean and standard deviation. AUC<sub>0-24</sub>: area under the plasma concentration-time curve from 0 to 24 hours after dosing; HIV: human immunodeficiency virus; σ<sup>2</sup>: residual variance, τ<sub>00</sub>: random intercept variance, τ<sub>11</sub>: random slope variance, ρ<sub>01</sub>: random slope-intercept correlation, ICC: intraclass correlation coefficient, N: number of included studies, conditional R<sup>2</sup>: the proportion of variance explained by both the fixed and random effects. <sup>¶</sup>Drug dose was mean-centred by subtracting the mean from each data point, then standardized by dividing each point by the standard deviation. <sup>§§</sup>Moderate malnutrition was defined as a weigh-for-age or height-for-age Z-score ≥-3 but <-2 in children aged <5 years, and a height-for-age or body mass index-for-age Z-score ≥-3 but <-2 in children aged ≥5 years; and severe malnutrition was defined as a weigh-for-age or height-for-age Z-score <-3 in children aged <5 years, and a height-for-age or body mass index-for-age Z-score <-3 in children aged ≥5 years. <sup>¶¶</sup>Details are described in Appendix 4. \*\*\*p<0.001, \*\*p<0.01, \*p<0.05, #p<0.1.

**Table E24. Multivariate linear mixed-effects analyses of factors associated with log-transformed  $C_{max}$  values for first-line antituberculosis drugs in children and adolescents with tuberculosis, considering WHO region as a third-level clustering variable.**

|                                                      | Fixed-effects coefficient (95% CI) |                          |                                  |                       |
|------------------------------------------------------|------------------------------------|--------------------------|----------------------------------|-----------------------|
|                                                      | Isoniazid                          | Rifampicin               | Pyrazinamide                     | Ethambutol            |
| (Intercept)                                          | 1.42 (1.11–1.72)***                | 2.21 (2.01–2.41)***      | 3.73 (3.58–3.88)***              | 0.75 (0.49–1.00)***   |
| Dose, mg/kg <sup>¶</sup>                             | 0.41 (0.30–0.52)***                | 0.52 (0.33–0.72)***      | 0.16 (0.11–0.22)***              | 0.13 (0.05–0.22)**    |
| Age                                                  |                                    |                          |                                  |                       |
| <2 years                                             | -0.28 (-0.40–0.16)***              | -0.42 (-0.57–0.27)***    | -0.18 (-0.28–0.08)***            | -0.68 (-0.90–0.46)*** |
| 2–4 years                                            | -0.08 (-0.18–0.03)                 | -0.18 (-0.32–0.04)*      | -0.15 (-0.24–0.06)**             | -0.32 (-0.53–0.11)**  |
| 5–9 years                                            | -0.03 (-0.13–0.06)                 | -0.09 (-0.22–0.04)       | -0.10 (-0.18–0.02)*              | -0.12 (-0.31–0.06)    |
| 10–14 years                                          | Ref.                               | Ref.                     | Ref.                             | Ref.                  |
| 15–18 years                                          | -0.01 (-0.30–0.27)                 | 0.06 (-0.31–0.42)        | -0.01 (-0.26–0.23)               | 0.10 (-0.51–0.70)     |
| Sex                                                  |                                    |                          |                                  |                       |
| Female                                               | Ref.                               | Ref.                     | Ref.                             | Ref.                  |
| Male                                                 | -0.04 (-0.11–0.03)                 | -0.02 (-0.07–0.10)       | -0.05 (-0.11–0.001) <sup>#</sup> | -0.03 (-0.17–0.10)    |
| Malnourished <sup>§§</sup>                           |                                    |                          |                                  |                       |
| No                                                   | Ref.                               | Ref.                     | Ref.                             | Ref.                  |
| Yes, moderate                                        | -0.06 (-0.14–0.03)                 | -0.03 (-0.14–0.07)       | -0.02 (-0.09–0.05)               | -0.10 (-0.27–0.07)    |
| Yes, severe                                          | -0.09 (-0.18–0.003)*               | -0.12 (-0.24–0.01)*      | -0.10 (-0.18–0.03)**             | -0.12 (-0.29–0.06)    |
| Unknown                                              | 0.12 (-0.14–0.38)                  | -0.14 (-0.67–0.39)       | 0.05 (-0.16–0.26)                | -0.33 (-0.78–0.12)    |
| HIV status                                           |                                    |                          |                                  |                       |
| Negative                                             | Ref.                               | Ref.                     | Ref.                             | Ref.                  |
| Positive                                             | -0.18 (-0.28–0.07)**               | -0.25 (-0.39–0.11)***    | -0.11 (-0.20–0.02)*              | -0.35 (-0.53–0.17)*** |
| Unknown                                              | 0.06 (-0.18–0.29)                  | -0.19 (-0.49–0.11)       | -0.06 (-0.23–0.11)               | 0.04 (-0.34–0.43)     |
| Acetylator status, $t_{1/2}$ phenotype <sup>¶¶</sup> |                                    |                          |                                  |                       |
| Slow                                                 | 0.23 (0.16–0.31)***                | n/a                      | n/a                              | n/a                   |
| Intermediate                                         | Ref.                               | n/a                      | n/a                              | n/a                   |
| Rapid                                                | -0.13 (-0.25–0.02)*                | n/a                      | n/a                              | n/a                   |
| Unknown                                              | -0.38 (-0.53–0.22)***              | n/a                      | n/a                              | n/a                   |
| Random effects                                       |                                    |                          |                                  |                       |
| $\sigma^2$                                           | 0.35 (0.59) <sup>§</sup>           | 0.49 (0.70) <sup>§</sup> | 0.19 (0.44) <sup>§</sup>         | 0.53 (0.73)           |
| $\tau_{00}$ WHO regions:studies                      | 0.10 (0.31) <sup>§</sup>           | 0.11 (0.33) <sup>§</sup> | 0.03 (0.17) <sup>§</sup>         | 0.06 (0.24)           |
| $\tau_{00}$ WHO regions                              | 0.04 (0.20) <sup>§</sup>           | n/a                      | 0.01 (0.08) <sup>§</sup>         | n/a                   |
| $\tau_{11}$ WHO regions:studies*doses                | 0.04 (0.21) <sup>§</sup>           | 0.10 (0.32) <sup>§</sup> | 0.01 (0.09) <sup>§</sup>         | n/a                   |
| $\rho_{01}$ WHO regions:studies                      | -0.33                              | 0.02                     | -0.04                            | n/a                   |
| ICC                                                  | 0.33                               | 0.32                     | 0.19                             | 0.10                  |
| N WHO regions                                        | 3                                  | 3                        | 3                                | 3                     |
| N studies                                            | 27                                 | 22                       | 23                               | 11                    |
| Observations                                         | 1292                               | 1105                     | 1021                             | 483                   |
| Conditional R <sup>2</sup>                           | 0.52                               | 0.55                     | 0.31                             | 0.23                  |

Data are presented as fixed-effects coefficients (beta coefficients) and 95% confidence intervals (CI), unless stated otherwise: <sup>§</sup>mean and standard deviation. AUC<sub>0–24</sub>: area under the plasma concentration-time curve from 0 to 24 hours after dosing; HIV: human immunodeficiency virus;  $\sigma^2$ : residual variance,  $\tau_{00}$ : random intercept variance,  $\tau_{11}$ : random slope variance,  $\rho_{01}$ : random slope-intercept correlation, ICC: intraclass correlation coefficient, N: number of included studies, conditional R<sup>2</sup>: the proportion of variance explained by both the fixed and random effects. <sup>¶</sup>Drug dose was mean-centred by subtracting the mean from each data point, then standardized by dividing each point by the standard deviation. <sup>§§</sup>Moderate malnutrition was defined as a weigh-for-age or height-for-age Z-score  $\geq -3$  but  $< -2$  in children aged  $< 5$  years, and a height-for-age or body mass index-for-age Z-score  $\geq -3$  but  $< -2$  in children aged  $\geq 5$  years; and severe malnutrition was defined as a weigh-for-age or height-for-age Z-score  $< -3$  in children aged  $< 5$  years, and a height-for-age or body mass index-for-age Z-score  $< -3$  in children aged  $\geq 5$  years. <sup>¶¶</sup>Details are described in Appendix 4. \*\*\*p<0.001, \*\*p<0.01, \*p<0.05, #p<0.1.

**Table E25. Multivariate linear mixed-effects analyses on the effect of paediatric/adult dosing category on log-transformed AUC<sub>0-24</sub> values for isoniazid, rifampicin and pyrazinamide in tuberculosis patients weighing  $\geq 25$  kg, adjusted for at least age, sex, nutritional status, and HIV status.<sup>‡</sup>**

|                                                             | Fixed-effects coefficient (95% CI) |                          |                                |
|-------------------------------------------------------------|------------------------------------|--------------------------|--------------------------------|
|                                                             | Isoniazid                          | Rifampicin               | Pyrazinamide                   |
| (Intercept)                                                 | 2.98 (2.58–3.38)***                | 3.54 (3.09–3.98)***      | 5.81 (5.51–6.11)***            |
| Dose category <sup>†</sup>                                  |                                    |                          |                                |
| Paediatric dosing                                           | Ref.                               | Ref.                     | Ref.                           |
| Adult dosing                                                | -1.01 (-1.27–-0.76)***             | -0.35 (-0.63–-0.07)*     | -0.14 (-0.34–0.06)             |
| Age                                                         | -0.08 (-0.30–0.13)                 | 0.15 (-0.09–0.39)        | 0.13 (-0.02–0.28) <sup>#</sup> |
| Sex                                                         |                                    |                          |                                |
| Female                                                      | Ref.                               | Ref.                     | Ref.                           |
| Male                                                        | -0.12 (-0.32–0.07)                 | -0.17 (-0.40–0.05)       | -0.06 (-0.20–0.08)             |
| Malnourished <sup>§§</sup>                                  |                                    |                          |                                |
| No                                                          | Ref.                               | Ref.                     | Ref.                           |
| Yes, moderate                                               | -0.14 (-0.39–0.11)                 | 0.14 (-0.13–0.41)        | 0.05 (-0.11–0.21)              |
| Yes, severe                                                 | -0.42 (-0.75–-0.09)*               | -0.12 (-0.49–0.24)       | 0.07 (-0.14–0.29)              |
| Unknown                                                     | -0.07 (-0.66–0.51)                 | n/a                      | -0.57 (-1.10–-0.05)*           |
| HIV status                                                  |                                    |                          |                                |
| Negative                                                    | Ref.                               | Ref.                     | Ref.                           |
| Positive                                                    | -0.27 (-0.65–0.10)                 | -0.44 (-0.82–-0.06)*     | -0.17 (-0.43–0.09)             |
| Unknown                                                     | 0.34 (-0.46–1.13)                  | 0.12 (-0.81–1.04)        | 0.02 (-0.41–0.45)              |
| Acetylator status, t <sub>1/2</sub> phenotype <sup>¶¶</sup> |                                    |                          |                                |
| Slow                                                        | 0.82 (0.59–1.05)***                | n/a                      | n/a                            |
| Intermediate                                                | Ref.                               | n/a                      | n/a                            |
| Rapid                                                       | -0.45 (-0.85–-0.06)*               | n/a                      | n/a                            |
| Unknown                                                     | 0.52 (0.08–0.97)*                  | n/a                      | n/a                            |
| Random effects                                              |                                    |                          |                                |
| $\sigma^2$                                                  | 0.45 (0.67) <sup>§</sup>           | 0.47 (0.68) <sup>§</sup> | 0.16 (0.40) <sup>§</sup>       |
| $\tau_{00}$ studies                                         | 0.12 (0.34) <sup>§</sup>           | 0.08 (0.29) <sup>§</sup> | 0.06 (0.23) <sup>§</sup>       |
| ICC                                                         | 0.21                               | 0.15                     | 0.25                           |
| N studies                                                   | 24                                 | 17                       | 20                             |
| Observations                                                | 213                                | 160                      | 160                            |
| Conditional R <sup>2</sup>                                  | 0.57                               | 0.28                     | 0.34                           |

Data are presented as fixed-effects coefficients (beta coefficients) and 95% confidence intervals (CI), unless stated otherwise: <sup>§</sup>mean and standard deviation. AUC<sub>0-24</sub>: area under the plasma concentration-time curve from 0 to 24 hours after dosing; HIV: human immunodeficiency virus;  $\sigma^2$ : residual variance,  $\tau_{00}$ : random intercept variance,  $\tau_{11}$ : random slope variance,  $\rho_{01}$ : random slope-intercept correlation, ICC: intraclass correlation coefficient, N: number of included studies, conditional R<sup>2</sup>: the proportion of variance explained by both the fixed and random effects. <sup>‡</sup>Current paediatric and adult dosing for ethambutol overlap significantly (15-25 mg/kg vs 15-20 mg/kg, respectively), and therefore the data for ethambutol were not analysed. <sup>†</sup>Drug doses were categorized as adult dosing (i.e., isoniazid <7 mg/kg, rifampicin <10 mg/kg, and pyrazinamide <30 mg/kg) and paediatric dosing (i.e., isoniazid 7-15 mg/kg, rifampicin 10-20 mg/kg, and pyrazinamide 30-40 mg/kg). <sup>¶</sup>Drug dose was mean-centred by subtracting the mean from each data point, then standardized by dividing each point by the standard deviation. <sup>§§</sup>Moderate malnutrition was defined as a height-for-age or body mass index-for-age Z-score  $\geq -3$  but <-2, and severe malnutrition was defined as a height-for-age or body mass index-for-age Z-score <-3. <sup>¶¶</sup>Further details are described in Appendix 4. \*\*\*p<0.001, \*\*p<0.01, \*p<0.05, <sup>#</sup>p<0.1.

**Table E26. Multivariate linear mixed-effects analyses on the effect of paediatric/adult dosing category on log-transformed  $C_{\max}$  values for isoniazid, rifampicin and pyrazinamide in tuberculosis patients weighing  $\geq 25$  kg, adjusted for at least age, sex, nutritional status, and HIV status.<sup>‡</sup>**

|                                                      | Fixed-effects coefficient (95% CI) |                                  |                                  |
|------------------------------------------------------|------------------------------------|----------------------------------|----------------------------------|
|                                                      | Isoniazid                          | Rifampicin                       | Pyrazinamide                     |
| (Intercept)                                          | 1.80 (1.41–2.19) <sup>***</sup>    | 2.02 (1.66–2.39) <sup>***</sup>  | 3.49 (3.16–3.81) <sup>***</sup>  |
| Dose category <sup>†</sup>                           |                                    |                                  |                                  |
| Paediatric dosing                                    | Ref.                               | Ref.                             | Ref.                             |
| Adult dosing                                         | -0.97 (-1.22–-0.73) <sup>***</sup> | -0.30 (-0.53–-0.06) <sup>*</sup> | -0.21 (-0.42–-0.01) <sup>#</sup> |
| Age                                                  | -0.01 (-0.23–0.20)                 | 0.01 (-0.19–0.21)                | 0.17 (0.01–0.34) <sup>*</sup>    |
| Sex                                                  |                                    |                                  |                                  |
| Female                                               | Ref.                               | Ref.                             | Ref.                             |
| Male                                                 | -0.17 (-0.36–0.02) <sup>#</sup>    | -0.001 (-0.19–0.19)              | -0.06 (-0.21–0.09)               |
| Malnourished <sup>§§</sup>                           |                                    |                                  |                                  |
| No                                                   | Ref.                               | Ref.                             | Ref.                             |
| Yes, moderate                                        | -0.11 (-0.35–0.13)                 | 0.09 (-0.15–0.33)                | 0.03 (-0.15–0.21)                |
| Yes, severe                                          | -0.35 (-0.67–-0.03) <sup>*</sup>   | -0.26 (-0.57–0.04) <sup>#</sup>  | -0.08 (-0.32–0.16)               |
| Unknown                                              | -0.01 (-0.57–0.55)                 | n/a                              | -0.24 (-0.81–0.32)               |
| HIV status                                           |                                    |                                  |                                  |
| Negative                                             | Ref.                               | Ref.                             | Ref.                             |
| Positive                                             | -0.28 (-0.64–0.09)                 | -0.43 (-0.74–-0.13) <sup>*</sup> | -0.06 (-0.35–0.23)               |
| Unknown                                              | 0.66 (-0.04–1.36)                  | 0.14 (-0.64–0.93)                | 0.08 (-0.39–0.54)                |
| Acetylator status, $t_{1/2}$ phenotype <sup>¶¶</sup> |                                    |                                  |                                  |
| Slow                                                 | 0.22 (-0.001–0.45) <sup>#</sup>    | n/a                              | n/a                              |
| Intermediate                                         | Ref.                               | n/a                              | n/a                              |
| Rapid                                                | -0.25 (-0.64–0.14)                 | n/a                              | n/a                              |
| Unknown                                              | -0.70 (-1.06–-0.34) <sup>***</sup> | n/a                              | n/a                              |
| Random effects                                       |                                    |                                  |                                  |
| $\sigma^2$                                           | 0.44 (0.66) <sup>§</sup>           | 0.39 (0.62) <sup>§</sup>         | 0.21 (0.46) <sup>§</sup>         |
| $\tau_{00}$ studies                                  | 0.11 (0.34) <sup>§</sup>           | 0.03 (0.16) <sup>§</sup>         | 0.06 (0.24) <sup>§</sup>         |
| ICC                                                  | 0.21                               | 0.07                             | 0.21                             |
| N studies                                            | 24                                 | 17                               | 20                               |
| Observations                                         | 223                                | 173                              | 173                              |
| Conditional $R^2$                                    | 0.53                               | 201                              | 0.27                             |

Data are presented as fixed-effects coefficients (beta coefficients) and 95% confidence intervals (CI), unless stated otherwise: <sup>§</sup>mean and standard deviation.  $C_{\max}$ : peak plasma concentration; HIV: human immunodeficiency virus;  $\sigma^2$ : residual variance,  $\tau_{00}$ : random intercept variance,  $\tau_{11}$ : random slope variance,  $\rho_{01}$ : random slope-intercept correlation, ICC: intraclass correlation coefficient, N: number of included studies, conditional  $R^2$ : the proportion of variance explained by both the fixed and random effects. <sup>‡</sup>Current paediatric and adult dosing for ethambutol overlap significantly (15–25 mg/kg vs 15–20 mg/kg, respectively), and therefore the data for ethambutol were not analysed. <sup>†</sup>Drug doses were categorized as adult dosing (i.e., isoniazid <7 mg/kg, rifampicin <10 mg/kg, and pyrazinamide <30 mg/kg) and paediatric dosing (i.e., isoniazid 7–15 mg/kg, rifampicin 10–20 mg/kg, and pyrazinamide 30–40 mg/kg). <sup>¶</sup>Drug dose was mean-centred by subtracting the mean from each data point, then standardized by dividing each point by the standard deviation. <sup>§§</sup>Moderate malnutrition was defined as WFAZ or HFAZ  $\geq -3$  but <-2, and severe malnutrition was defined as WFAZ or HFAZ <-3. <sup>¶¶</sup>Further details are described in Appendix 4. <sup>\*\*\*</sup> $p < 0.001$ , <sup>\*\*</sup> $p < 0.01$ , <sup>\*</sup> $p < 0.05$ , <sup>#</sup> $p < 0.1$ .

**Table E27. Summary estimates of  $T_{\max}$ ,  $t_{1/2}$ , and  $K_e$  for first-line antituberculosis drugs in children and adolescents with tuberculosis.**

|                         | No. of studies | No. of observations | Summary estimates (95% CI) | Heterogeneity $I^2$ statistics |
|-------------------------|----------------|---------------------|----------------------------|--------------------------------|
| Isoniazid               |                |                     |                            |                                |
| § $T_{\max}$ , h        | 24             | 1219                | 1.6 (1.4–1.8)              | 99.0%                          |
| $t_{1/2}$ , h           | 27             | 1203                | 2.2 (2.0–2.5)              | 97.9%                          |
| $K_e$ , h <sup>-1</sup> | 27             | 1203                | 0.31 (0.27–0.35)           | 97.9%                          |
| Rifampicin              |                |                     |                            |                                |
| § $T_{\max}$ , h        | 22             | 1037                | 2.3 (2.0–2.5)              | 93.2%                          |
| $t_{1/2}$ , h           | 22             | 814                 | 2.1 (1.9–2.3)              | 94.1%                          |
| $K_e$ , h <sup>-1</sup> | 22             | 814                 | 0.33 (0.30–0.37)           | 94.0%                          |
| Pyrazinamide            |                |                     |                            |                                |
| § $T_{\max}$ , h        | 22             | 1001                | 1.9 (1.6–2.2)              | 98.4%                          |
| $t_{1/2}$ , h           | 23             | 872                 | 6.1 (5.7–6.6)              | 83.1%                          |
| $K_e$ , h <sup>-1</sup> | 23             | 872                 | 0.11 (0.11–0.12)           | 83.0%                          |
| Ethambutol              |                |                     |                            |                                |
| § $T_{\max}$ , h        | 11             | 483                 | 2.6 (2.3–3.0)              | 90.8%                          |
| $t_{1/2}$ , h           | 10             | 321                 | 3.4 (2.5–4.6)              | 98.8%                          |
| $K_e$ , h <sup>-1</sup> | 10             | 321                 | 0.20 (0.15–0.27)           | 98.8%                          |

Data are presented as geometric mean, unless stated otherwise: §mean.  $T_{\max}$ : time to maximum concentration in plasma;  $t_{1/2}$ : elimination half-life;  $K_e$ : elimination rate constant.

## References for supplementary appendix:

- 1 Sterne JA, Hernán MA, Reeves BC, *et al.* ROBINS-I: A tool for assessing risk of bias in non-randomised studies of interventions. *BMJ* 2016; 355: 1–7.
- 2 Soliman ABE, Pawluk SA, Wilby KJ, Rachid O. The use of a modified Delphi technique to develop a critical appraisal tool for clinical pharmacokinetic studies. *Int J Clin Pharm* 2022. DOI:10.1007/s11096-022-01390-y.
- 3 Schaaf HS, Parkin DP, Seifart HI, *et al.* Isoniazid pharmacokinetics in children treated for respiratory tuberculosis. *Arch Dis Child* 2005; 90: 614–8.
- 4 McIlleron H, Willemse M, Werely CJJ, *et al.* Isoniazid plasma concentrations in a cohort of South African children with tuberculosis: implications for international pediatric dosing guidelines. *Clin Infect Dis* 2009; 48: 1547–53.
- 5 Thee S, Seddon JA, Donald PR, *et al.* Pharmacokinetics of isoniazid, rifampin, and pyrazinamide in children younger than two years of age with tuberculosis: Evidence for implementation of revised World Health Organization recommendations. *Antimicrob Agents Chemother* 2011; 55: 5560–7.
- 6 Verhagen LM, Lopez D, Hermans PWM, *et al.* Pharmacokinetics of anti-tuberculosis drugs in Venezuelan children younger than 16 years of age: Supportive evidence for the implementation of revised WHO dosing recommendations. *Trop Med Int Heal* 2012; 17: 1449–56.
- 7 Ibrahim M, Engidawork E, Yimer G, Bobosha K. Pharmacokinetics of isoniazid in Ethiopian children with tuberculosis in relation to the N-acetyltransferase 2 (NAT2) genotype. *Afr J Pharm Pharmacol* 2013; 7: 1124–30.
- 8 Denti P, Wasmann RE, van Rie A, *et al.* Optimizing dosing and fixed-dose combinations of rifampicin, isoniazid, and pyrazinamide in pediatric patients with tuberculosis: a prospective population pharmacokinetic study. *Clin Infect Dis* 2022; 75: 141–151.
- 9 Stephens M, Donnelly P. A Comparison of Bayesian Methods for Haplotype Reconstruction from Population Genotype Data. *Am J Hum Genet* 2003; 73: 1162–9.
- 10 Parkin DP, Vandenplas S, Botha FJH, *et al.* Trimodality of isoniazid elimination - Phenotype and genotype in patients with tuberculosis. *Am J Respir Crit Care Med* 1997; 155: 1717–22.
- 11 Arylamine N-acetyltransferase Gene Nomenclature Committee. Consensus Human Arylamine N-acetyltransferase Gene Nomenclature. <http://nat.mbg.duth.gr>.
- 12 Vatsis KP, Weber WW, Bell DA, *et al.* Nomenclature for N-acetyltransferases. *Pharmacogenetics* 1995; 5: 1–17.
- 13 Antwi S, Yang H, Enimil A, *et al.* Pharmacokinetics of the first-line antituberculosis drugs in Ghanaian children with tuberculosis with or without HIV coinfection. *Antimicrob Agents Chemother* 2017; 61: e01701-16.
- 14 Van Aartsen D, Justine M, Mduma E, *et al.* Enteropathogen spectrum and effect on antimycobacterial pharmacokinetics among children with tuberculosis in rural Tanzania : a prospective cohort study. *Lancet Microbe* 2022; : S2666-5247(21)00308-6.
- 15 Hein DW, Doll MA. Accuracy of various human NAT2 SNP genotyping panels to infer rapid, intermediate and slow acetylator phenotypes. *Pharmacogenomics* 2012; 13: 31–41.
- 16 Seifart HI, Donald PR, de Villiers JN, Parkin DP, Jaarsveld PP. Isoniazid elimination kinetics in children with protein-energy malnutrition treated for tuberculous meningitis with a four-component antimicrobial regimen. *Ann Trop Paediatr* 1995; 15: 249–54.
- 17 Dayal R, Singh Y, Agarwal D, *et al.* Pharmacokinetic study of isoniazid and pyrazinamide in children : impact of age and nutritional status. *Arch Dis Child* 2018; 103: 1150–4.
- 18 Garcia-Prats AJ, Svensson EM, Winckler J, *et al.* Pharmacokinetics and safety of high-dose rifampicin in children with TB: the Opti-Rif trial. *J Antimicrob Chemother* 2021; 76: 3237–46.
- 19 Graham SM, Bell DJ, Nyirongo S, Hartkoorn R, Ward SA, Molyneux EM. Low levels of pyrazinamide

- and ethambutol in children with tuberculosis and impact of age, nutritional status, and human immunodeficiency virus infection. *Antimicrob Agents Chemother* 2006; 50: 407–13.
- 20 Gupta P, Roy V, Sethi GR, Mishra TK. Pyrazinamide blood concentrations in children suffering from tuberculosis: A comparative study at two doses. *Br J Clin Pharmacol* 2008; 65: 423–7.
  - 21 Martial LC, Kerkhoff J, Martinez N, *et al.* Evaluation of dried blood spot sampling for pharmacokinetic research and therapeutic drug monitoring of anti-tuberculosis drugs in children. *Int J Antimicrob Agents* 2018; 52: 109–13.
  - 22 Mave V, Kinikar A, Kagal A, *et al.* Isoniazid concentrations in hair and plasma area-under-the-curve exposure among children with tuberculosis. *PLoS One* 2017; 12.
  - 23 McIlleron H, Willemse M, Schaaf HS, Smith PJ, Donald PR. Pyrazinamide plasma concentrations in young children with tuberculosis. *Pediatr Infect Dis J* 2011; 30: 262–5.
  - 24 Mlotha R, Waterhouse D, Dzinjalama F, *et al.* Pharmacokinetics of anti-TB drugs in Malawian children: reconsidering the role of ethambutol. *J Antimicrob Chemother* 2015; 70: 1798–803.
  - 25 Mukherjee A, Velpandian T, Singla M, Kanhiya K, Kabra SK, Lodha R. Pharmacokinetics of isoniazid, rifampicin, pyrazinamide and ethambutol in Indian children. *BMC Infect Dis* 2015; 15: 126.
  - 26 Mukherjee A, Velpandian T, Singla M, Kanhiya K, Kabra SK, Lodha R. Pharmacokinetics of isoniazid, rifampicin, pyrazinamide and ethambutol in HIV-infected Indian children. *Int J Tuberc Lung Dis* 2016; 20: 666–72.
  - 27 Ramachandran G, Hemanth Kumar AK, Bhavani PK, *et al.* Age, nutritional status and INH acetylase status affect pharmacokinetics of anti-tuberculosis drugs in children. *Int J Tuberc Lung Dis* 2013; 17: 800–6.
  - 28 Ramachandran G, Kumar AKH, Bhavani PK, *et al.* Pharmacokinetics of first-line antituberculosis drugs in HIV-infected children with tuberculosis treated with intermittent regimens in India. *Antimicrob Agents Chemother* 2015; 59: 1162–7.
  - 29 Rangari GM, Roy V, Sethi GR, Mishra TK, Khanna A. Blood levels of isoniazid in Indian children with tuberculosis. *Indian J Tuberc* 2015; 62: 80–5.
  - 30 Ranjalkar J, Mathew SK, Philip V, *et al.* Isoniazid and rifampicin concentrations in children with tuberculosis with either a daily or intermittent regimen: implications for the revised RNTCP 2012 doses in India. *Int J Antimicrob Agents* 2018; 51: 663–9.
  - 31 Roy V, Tekur U, Chopra K. Pharmacokinetics of isoniazid in pulmonary tuberculosis - a comparative study at two dose levels. *Indian Pediatr* 1996; 33: 287–91.
  - 32 Roy V, Tekur U, Chopra K. Pharmacokinetics of pyrazinamide in children suffering from pulmonary tuberculosis. *Int J Tuberc Lung Dis* 1999; 3: 133–7.
  - 33 Roy V, Gupta D, Gupta P, Sethi GR, Mishra TK. Pharmacokinetics of isoniazid in moderately malnourished children with tuberculosis. *Int J Tuberc Lung Dis* 2010; 14: 374–6.
  - 34 Roy V, Sahni P, Gupta P, Sethi GR, Khanna A. Blood levels of pyrazinamide in children at doses administered under the revised national tuberculosis control program. *Indian Pediatr* 2012; 49: 721–5.
  - 35 Ruslami R, Gafar F, Yunivita V, *et al.* Pharmacokinetics and safety/tolerability of isoniazid, rifampicin and pyrazinamide in children and adolescents treated for tuberculous meningitis. *Arch Dis Child* 2022; 107: 70–7.
  - 36 Schaaf HS, Willemse M, Cilliers K, *et al.* Rifampin pharmacokinetics in children, with and without human immunodeficiency virus infection, hospitalized for the management of severe forms of tuberculosis. *BMC Med* 2009; 7: 19.
  - 37 Shah I, Jadhao N, Deshpande S, Gogtay N, Thatte U. Pharmacokinetics of isoniazid in Indian children with tuberculosis on daily treatment. *Int J Tuberc Lung Dis* 2019; 23: 52–7.
  - 38 Shah I, Kumar Das S, Shetty NS, Kannan T, Ramachandran G, Kumar AH. Pharmacokinetics of isoniazid in children with tuberculosis-A comparative study at two doses. *Pediatr Pulmonol* 2020; 55: 660–5.

- 39 Zhu M, Starke JR, Burman WJ, *et al.* Population pharmacokinetic modeling of pyrazinamide in children and adults with tuberculosis. *Pharmacotherapy* 2002; 22: 686–95.
- 40 Zhu M, Burman WJ, Starke JR, *et al.* Pharmacokinetics of ethambutol in children and adults with tuberculosis. *Int J Tuberc Lung Dis* 2004; 8: 1360–7.
- 41 Tikiso T, McIlleron H, Abdelwahab MT, *et al.* Population pharmacokinetics of ethambutol in African children: a pooled analysis. *J Antimicrob Chemother* 2022; : dkac127. doi: 10.1093/jac/dkac127.
- 42 Arya A, Roy V, Lomash A, Kapoor S, Khanna A, Rangari G. Rifampicin pharmacokinetics in children under the Revised National Tuberculosis Control Programme, India, 2009. *Int J Tuberc Lung Dis* 2015; 19: 440–5.
- 43 Chabala C, Turkova A, Hesselning AC, *et al.* Pharmacokinetics of first-line drugs in children with tuberculosis, using World Health Organization–recommended weight band doses and formulations. *Clin Infect Dis* 2022; 74: 1767–75.
- 44 Justine M, Yeconia A, Nicodemu I, *et al.* Pharmacokinetics of first-line drugs among children with tuberculosis in rural Tanzania. *J Pediatric Infect Dis Soc* 2020; 9: 14–20.
- 45 Mlotha R, Waterhouse D, Dzinjalama F, *et al.* Pharmacokinetics of first-line antituberculosis drugs in Malawian children. Unpublished data (Blantyre, Malawi). 2015.
- 46 Pouplin T, Bang ND, Toi P Van, *et al.* Naïve-pooled pharmacokinetic analysis of pyrazinamide, isoniazid and rifampicin in plasma and cerebrospinal fluid of Vietnamese children with tuberculous meningitis. *BMC Infect Dis* 2016; 16: 114.
- 47 Schipani A, Pertinez H, Mlota R, *et al.* A simultaneous population pharmacokinetic analysis of rifampicin in Malawian adults and children. *Br J Clin Pharmacol* 2016; 81: 679–87.
- 48 Donald PR, Gent WL, Seifart HI, Lamprecht JH, Parkin DP. Cerebrospinal fluid isoniazid concentrations in children with tuberculous meningitis: the influence of dosage and acetylation status. *Pediatrics* 1992; 89: 247–50.
- 49 Rey E, Pons G, Cremier O, *et al.* Isoniazid dose adjustment in a pediatric population. *Ther Drug Monit* 1998; 20: 50–5.
- 50 Hiruy H, Rogers Z, Mbowane C, *et al.* Subtherapeutic concentrations of first-line anti-TB drugs in South African children treated according to current guidelines: The PHATISA study. *J Antimicrob Chemother* 2015; 70: 1115–23.
- 51 Arya DS, Ojha SK, Semwal OP, Nandave M. Pharmacokinetics of pyrazinamide in children with primary progressive disease of lungs. *Indian J Med Res* 2008; 128: 611–5.
- 52 Arya D, Ojha S. Pharmacokinetics of pyrazinamide in pediatric patients of tuberculosis meningitis. *World J Med Sci* 2009; 4: 128–34.
- 53 Seth V, Beotra A, Seth SD, *et al.* Serum concentrations of rifampicin and isoniazid in tuberculosis. *Indian Pediatr* 1993; 30: 1091–8.
- 54 Seth V, Seth SD, Beotra A, Semwal OP, D’monty V, Mukhopadhyaya S. Isoniazid and acetylisoniazid kinetics in serum and urine in pulmonary primary complex with intermittent regimen. *Indian Pediatr* 1994; 31: 279–85.
- 55 Donald PR, Seifart HI, Parkin DP, van Jaarsveld PP. Hydrazine production in children receiving isoniazid for the treatment of tuberculous meningitis. *Ann Pharmacother* 1994; 28: 1340–3.
- 56 Mahajan M, Rohatgi D, Talwar V, Patni SK, Mahajan P, Agarwal DS. Serum and cerebrospinal fluid concentrations of rifampicin at two dose levels in children with tuberculous meningitis. *J Commun Dis* 1997; 29: 269–74.
- 57 Minchev P, Svinarov D. Monitoring Tubocin (Rifampicin) treatment in children with tuberculosis. *Acta Medica Bulg* 2005; 32: 3–9.
- 58 Rey E, Gendrel D, Treluyer JM, *et al.* Isoniazid pharmacokinetics in children according to acetylase phenotype. *Fundam Clin Pharmacol* 2001; 15: 355–9.

- 59 Thee S, Detjen AA, Wahn U, Magdorf K. Isoniazid pharmacokinetic studies of the 1960s: considering a higher isoniazid dose in childhood tuberculosis. *Scand J Infect Dis* 2010; 42: 294–8.
- 60 Thee S, Detjen A, Wahn U, Magdorf K. Rifampicin serum levels in childhood tuberculosis. *Int J Tuberc Lung Dis* 2009; 13: 1106–11.
- 61 Thee S, Detjen A, Wahn U, Magdorf K. Pyrazinamide serum levels in childhood tuberculosis. *Int J Tuberc Lung Dis* 2008; 12: 1099–101.
- 62 Thee S, Detjen A, Quarcoo D, Wahn U, Magdorf K. Ethambutol in paediatric tuberculosis: aspects of ethambutol serum concentration, efficacy and toxicity in children. *Int J Tuberc Lung Dis* 2007; 11: 965–71.
- 63 Stewart LA, Clarke M, Rovers M, *et al.* Preferred reporting items for a systematic review and meta-analysis of individual participant data: The PRISMA-IPD statement. *JAMA* 2015; 313: 1657–65.
